# Supplementary material
Source: PubMed Central journal article supplement (PMC2957797)
Supplement: baeb0d0002897455de999b51cef3f24c_tableS1-S6.pdf [file baeb0d0002897455de999b51cef3f24c_tableS1-S6.pdf]

**Supplementary Table 1:** Estimated Parameters Values for the Sinusoidal Curve  $Asin(Bt+C)+\text{mean}$  for Individual Probe Sets Mined for Circadian Oscillations in Expression

| <b>Probe set ID</b> | <b>Mean</b> | <b>A</b> | <b>B</b> | <b>C</b> |
|---------------------|-------------|----------|----------|----------|
| 1367850_at          | 1.05223     | -0.635   | 0.261    | -7.829   |
| 1370510_a_at        | 1.04551     | -0.822   | 0.259    | -8.129   |
| 1398246_s_at        | 1.18976     | -0.724   | 0.26     | -7.793   |
| 1378745_at          | 1.42316     | -1.274   | 0.265    | -4.852   |
| 1390430_at          | 1.20192     | -0.984   | 0.265    | -4.736   |
| 1373542_at          | 0.9774      | -0.309   | 0.265    | -7.998   |
| 1367771_at          | 0.94425     | -0.438   | 0.262    | -6.331   |
| 1370541_at          | 1.31286     | -1.073   | 0.267    | -4.869   |
| 1368303_at          | 0.99448     | -0.841   | 0.264    | -5.938   |
| 1383439_at          | 1.05091     | -1.063   | 0.258    | -8.62    |
| 1393730_at          | 0.96453     | -0.527   | 0.27     | -8.404   |
| 1392640_at          | 1.0874      | -0.655   | 0.255    | -7.039   |
| 1373114_at          | 1.08016     | -0.571   | 0.262    | -8.768   |
| 1392579_at          | 1.04434     | -0.437   | 0.262    | -7.54    |
| 1377635_at          | 1.04532     | -0.568   | 0.265    | -5.783   |
| 1398877_at          | 1.03279     | -0.266   | 0.257    | -7.208   |
| 1390819_at          | 1.09304     | -0.566   | 0.266    | -5.316   |
| 1383518_at          | 0.99252     | -0.414   | 0.263    | -8.505   |
| 1378156_at          | 1.02711     | -0.433   | 0.267    | -5.996   |
| 1398365_at          | 1.0729      | -0.43    | 0.258    | -6.795   |
| 1370445_at          | 1.00351     | -0.173   | 0.262    | -6.283   |
| 1369919_at          | 1.03053     | -0.76    | 0.264    | -4.332   |
| 1388002_at          | 1.00018     | 0.416    | 0.26     | -6.078   |
| 1381469_a_at        | 1.01618     | -0.272   | 0.259    | -3.621   |
| 1388898_at          | 0.98988     | -0.411   | 0.261    | -7.273   |
| 1398370_at          | 1.0214      | -0.368   | 0.265    | -5.777   |
| 1368486_at          | 1.04896     | -0.388   | 0.259    | -7.57    |
| 1382266_at          | 1.16805     | -0.565   | 0.265    | -5.193   |
| 1382031_at          | 1.16793     | -0.827   | 0.266    | -5.79    |
| 1368571_at          | 1.05103     | -0.388   | 0.266    | -8.549   |
| 1371832_at          | 0.9998      | -0.281   | 0.259    | -7.73    |
| 1393917_at          | 1.0273      | -0.54    | 0.26     | -6.165   |
| 1382192_at          | 1.02074     | -0.412   | 0.263    | -6.092   |
| 1370816_at          | 1.69352     | -2.082   | 0.269    | -4.269   |
| 1387874_at          | 1.6992      | -1.757   | 0.271    | -5.063   |
| 1374681_at          | 0.97447     | -0.39    | 0.266    | -8.802   |
| 1370912_at          | 0.96294     | -0.698   | 0.266    | -6.783   |
| 1370991_at          | 1.05929     | -0.766   | 0.26     | -6.11    |
| 1373708_at          | 1.09612     | -0.509   | 0.256    | -6.68    |
| 1395629_at          | 1.07616     | -0.566   | 0.26     | -8.881   |

**Supplementary Table 1:** Estimated Parameters Values for the Sinusoidal Curve  $Asin(Bt+C)+\text{mean}$  for Individual Probe Sets Mined for Circadian Oscillations in Expression

| <b>Probe set ID</b> | <b>Mean</b> | <b>A</b> | <b>B</b> | <b>C</b> |
|---------------------|-------------|----------|----------|----------|
| 1370570_at          | 0.99115     | 0.366    | 0.256    | -6.127   |
| 1371913_at          | 1.00896     | -0.31    | 0.258    | -5.615   |
| 1391208_at          | 0.96044     | -0.445   | 0.259    | -5.458   |
| 1368488_at          | 1.16014     | -0.754   | 0.258    | -7.57    |
| 1393696_at          | 1.04659     | -0.291   | 0.262    | -7.016   |
| 1368304_at          | 1.0274      | -0.416   | 0.261    | -5.587   |
| 1370266_at          | 1.07763     | 0.44     | 0.26     | -6.066   |
| 1376071_at          | 1.00697     | -0.269   | 0.272    | -8.685   |
| 1389456_at          | 0.9924      | -0.248   | 0.266    | -8.483   |
| 1393075_at          | 0.93575     | -0.516   | 0.262    | -7.258   |
| 1385973_at          | 1.31634     | -1.742   | 0.267    | -5.828   |
| 1398255_at          | 0.99539     | -0.324   | 0.262    | -5.051   |
| 1388901_at          | 1.10115     | -0.576   | 0.265    | -5.823   |
| 1398597_at          | 1.02881     | 0.535    | 0.265    | -12.287  |
| 1385585_at          | 0.95737     | -0.412   | 0.258    | -5.715   |
| 1368177_at          | 0.98212     | -0.352   | 0.265    | -6.908   |
| 1383263_at          | 0.97478     | 0.29     | 0.268    | -6.688   |
| 1370209_at          | 1.07424     | -0.383   | 0.262    | -4.911   |
| 1373718_at          | 1.06798     | -0.336   | 0.26     | -8.293   |
| 1371505_at          | 1.04004     | -0.183   | 0.261    | -7.242   |
| 1371583_at          | 1.04961     | -0.256   | 0.26     | -4.875   |
| 1380611_at          | 1.16407     | -0.754   | 0.265    | -6.011   |
| 1388525_at          | 0.9999      | -0.34    | 0.259    | -4.92    |
| 1372390_at          | 1.09522     | -0.485   | 0.27     | -4.591   |
| 1376858_at          | 1.07823     | -0.333   | 0.261    | -7.088   |
| 1370954_at          | 1.04357     | -0.368   | 0.258    | -6.852   |
| 1388064_a_at        | 1.01883     | 0.332    | 0.262    | -6.423   |
| 1384106_at          | 1.00068     | -0.184   | 0.264    | -5.917   |
| 1389844_at          | 1.00091     | -0.267   | 0.257    | -6.918   |
| 1380306_at          | 0.99794     | -0.607   | 0.26     | -5.487   |
| 1371367_at          | 1.03775     | -0.256   | 0.26     | -6.928   |
| 1398662_at          | 1.08225     | -0.364   | 0.255    | -6.959   |
| 1390628_at          | 1.04797     | -0.371   | 0.267    | -8.204   |
| 1396417_at          | 0.98065     | -0.25    | 0.259    | -6.396   |
| 1392927_at          | 1.0464      | -0.257   | 0.257    | -5.988   |
| 1392149_at          | 1.19505     | -0.669   | 0.268    | -4.867   |
| 1368882_at          | 1.04199     | -0.331   | 0.259    | -8.944   |
| 1380598_at          | 1.07036     | -0.231   | 0.255    | -7.071   |
| 1391187_at          | 1.02054     | -0.585   | 0.266    | -5.431   |
| 1387631_at          | 0.98767     | -0.287   | 0.264    | -8.15    |

**Supplementary Table 1:** Estimated Parameters Values for the Sinusoidal Curve  $Asin(Bt+C)+\text{mean}$  for Individual Probe Sets Mined for Circadian Oscillations in Expression

| <b>Probe set ID</b> | <b>Mean</b> | <b>A</b> | <b>B</b> | <b>C</b> |
|---------------------|-------------|----------|----------|----------|
| 1397766_at          | 1.0062      | -0.267   | 0.272    | -5.599   |
| 1388949_at          | 1.00741     | -0.231   | 0.262    | -5.161   |
| 1394824_at          | 1.04398     | -0.354   | 0.261    | -6.754   |
| 1384209_at          | 0.95798     | -0.391   | 0.267    | -5.355   |
| 1368189_at          | 1.05848     | -0.413   | 0.252    | -8.354   |
| 1368200_at          | 1.01318     | -0.38    | 0.261    | -8.185   |
| 1372091_at          | 1.05924     | -0.45    | 0.261    | -7.333   |
| 1384110_at          | 1.01726     | -0.393   | 0.262    | -5.671   |
| 1395859_at          | 1.00919     | -0.349   | 0.267    | -6.234   |
| 1376440_at          | 1.01862     | -0.186   | 0.258    | -6.002   |
| 1368249_at          | 0.98404     | -0.388   | 0.266    | -5.253   |
| 1376465_at          | 1.01258     | 0.191    | 0.253    | -8.24    |
| 1373158_at          | 1.1756      | -0.52    | 0.266    | -5.168   |
| 1374706_at          | 0.98895     | -0.136   | 0.255    | -6.097   |
| 1398434_at          | 0.93521     | -0.24    | 0.259    | -6.432   |
| 1376177_at          | 0.99288     | -0.265   | 0.262    | -5.452   |
| 1375908_at          | 1.04631     | -0.392   | 0.271    | -8.849   |
| 1379051_at          | 0.9883      | -0.329   | 0.264    | -6.139   |
| 1398819_at          | 1.03607     | -0.318   | 0.261    | -6.788   |
| 1377982_at          | 0.95347     | -0.361   | 0.266    | -8.756   |
| 1370963_at          | 1.04483     | -0.322   | 0.264    | -6.646   |
| 1395377_at          | 1.00659     | 0.235    | 0.259    | -6.647   |
| 1392557_at          | 0.98268     | -0.344   | 0.265    | -5.815   |
| 1381157_at          | 0.96005     | -0.236   | 0.254    | -5.77    |
| 1382732_at          | 0.97269     | -0.406   | 0.266    | -6.13    |
| 1389020_at          | 1.02018     | -0.315   | 0.248    | -6.244   |
| 1368862_at          | 1.00063     | -0.217   | 0.257    | -6.327   |
| 1382118_at          | 1.06549     | -0.492   | 0.264    | -4.032   |
| 1385229_at          | 0.96668     | -0.373   | 0.258    | -5.056   |
| 1372491_at          | 0.99425     | -0.172   | 0.253    | -6.344   |
| 1376947_at          | 1.02754     | -0.241   | 0.266    | -6.316   |
| 1393610_at          | 1.03663     | -0.218   | 0.266    | -4.227   |
| 1385374_at          | 1.01984     | -0.326   | 0.261    | -5.543   |
| 1395663_at          | 1.01307     | -0.233   | 0.271    | -8.507   |
| 1374855_at          | 1.6325      | -1.586   | 0.274    | -5.301   |
| 1381528_at          | 0.99163     | -0.201   | 0.252    | -6.489   |
| 1374531_at          | 1.04828     | -0.346   | 0.268    | -5.915   |
| 1374307_at          | 0.99413     | -0.241   | 0.254    | -5.94    |
| 1383004_at          | 0.97005     | 0.283    | 0.256    | -6.084   |
| 1378038_at          | 1.06179     | 0.25     | 0.257    | -6.427   |

**Supplementary Table 1:** Estimated Parameters Values for the Sinusoidal Curve  $Asin(Bt+C)+\text{mean}$  for Individual Probe Sets Mined for Circadian Oscillations in Expression

| <b>Probe set ID</b> | <b>Mean</b> | <b>A</b> | <b>B</b> | <b>C</b> |
|---------------------|-------------|----------|----------|----------|
| 1375209_at          | 1.05799     | -0.207   | 0.269    | -5.153   |
| 1381409_at          | 1.04718     | -0.353   | 0.273    | -8.586   |
| 1389199_at          | 1.04121     | -0.315   | 0.259    | -7.645   |
| 1392510_at          | 1.05296     | -0.307   | 0.259    | -5.467   |
| 1385904_at          | 1.01718     | -0.298   | 0.263    | -3.978   |
| 1377608_a_at        | 0.99119     | -0.15    | 0.259    | -6.794   |
| 1379477_at          | 1.00437     | -0.343   | 0.262    | -6.172   |
| 1389911_at          | 1.10474     | -0.358   | 0.271    | -4.835   |
| 1367568_a_at        | 1.00403     | -0.315   | 0.254    | -6.116   |
| 1388674_at          | 1.00673     | -0.271   | 0.266    | -7.724   |
| 1371864_at          | 1.06572     | -0.374   | 0.263    | -5.144   |
| 1379971_at          | 1.02905     | -0.244   | 0.262    | -4.05    |
| 1383610_at          | 1.02034     | -0.299   | 0.262    | -5.671   |
| 1392996_at          | 1.05473     | -0.396   | 0.27     | -4.909   |
| 1373093_at          | 1.06974     | -0.38    | 0.265    | -5.45    |
| 1379467_at          | 0.9975      | -0.478   | 0.272    | -6.009   |
| 1386641_at          | 0.98566     | -0.451   | 0.262    | -5.76    |
| 1367857_at          | 1.00194     | -0.224   | 0.26     | -7.495   |
| 1373960_at          | 1.09109     | -0.345   | 0.268    | -4.966   |
| 1381840_at          | 0.99561     | 0.264    | 0.256    | -6.501   |
| 1391577_at          | 1.00172     | -0.1     | 0.259    | -7.086   |
| 1393647_at          | 0.99717     | 0.117    | 0.256    | -8.54    |
| 1397409_s_at        | 0.9525      | -0.385   | 0.269    | -6.052   |
| 1373566_at          | 0.99195     | -0.202   | 0.26     | -6.898   |
| 1379369_at          | 1.03285     | -0.265   | 0.258    | -6.116   |
| 1368852_at          | 1.07713     | -0.307   | 0.261    | -6.999   |
| 1370540_at          | 1.13376     | -0.876   | 0.267    | -4.619   |
| 1385382_at          | 1.10625     | -0.7     | 0.263    | -9.017   |
| 1386832_a_at        | 1.01213     | -0.308   | 0.261    | -9.273   |
| 1386097_at          | 0.98884     | -0.269   | 0.26     | -3.808   |
| 1383533_at          | 1.02577     | 0.13     | 0.269    | -7.869   |
| 1389284_at          | 1.08446     | -0.522   | 0.273    | -8.813   |
| 1374036_at          | 0.97687     | -0.22    | 0.258    | -5.99    |
| 1386566_at          | 0.97553     | -0.195   | 0.252    | -9.232   |
| 1388945_at          | 1.04156     | -0.21    | 0.264    | -5.85    |
| 1368681_at          | 0.97782     | -0.495   | 0.261    | -6.051   |
| 1372086_at          | 0.99493     | -0.295   | 0.269    | -7.968   |
| 1372426_at          | 0.99596     | -0.267   | 0.252    | -5.867   |
| 1379716_at          | 1.12279     | -0.676   | 0.258    | -6.138   |
| 1391553_at          | 1.09565     | 0.318    | 0.252    | -6.134   |

**Supplementary Table 1:** Estimated Parameters Values for the Sinusoidal Curve  $A\sin(Bt+C)+\text{mean}$  for Individual Probe Sets Mined for Circadian Oscillations in Expression

| <b>Probe set ID</b> | <b>Mean</b> | <b>A</b> | <b>B</b> | <b>C</b> |
|---------------------|-------------|----------|----------|----------|
| 1370847_at          | 1.08249     | -0.479   | 0.273    | -8.733   |
| 1384386_at          | 1.03432     | -0.4     | 0.264    | -3.368   |
| 1369433_at          | 0.87794     | -0.302   | 0.265    | -4.214   |
| 1391808_at          | 1.03517     | -0.233   | 0.267    | -8.143   |
| 1392344_at          | 1.03717     | -0.183   | 0.265    | -4.471   |
| 1368527_at          | 1.07347     | -0.505   | 0.268    | -5.559   |
| 1373399_at          | 1.00788     | -0.24    | 0.268    | -9.317   |
| 1397251_at          | 1.0099      | 0.212    | 0.26     | -6.525   |
| 1375692_at          | 1.00898     | 0.102    | 0.264    | -8.501   |
| 1378105_at          | 0.98863     | -0.182   | 0.259    | -5.466   |
| 1386833_at          | 1.00047     | -0.265   | 0.259    | -9.029   |
| 1398635_at          | 1.12246     | -0.379   | 0.271    | -5.461   |
| 1385149_at          | 1.01192     | -0.224   | 0.252    | -6.372   |
| 1373816_at          | 0.99407     | -0.126   | 0.261    | -6.686   |
| 1393568_at          | 0.99349     | 0.149    | 0.258    | -11.309  |
| 1373239_at          | 1.06366     | -0.287   | 0.266    | -4.172   |
| 1375760_at          | 0.98482     | -0.264   | 0.259    | -5.099   |
| 1370283_at          | 1.00278     | -0.167   | 0.256    | -7.232   |
| 1373403_at          | 1.03119     | -0.275   | 0.254    | -5.902   |
| 1396053_at          | 0.98887     | 0.22     | 0.257    | -11.259  |
| 1372590_at          | 1.04354     | -0.237   | 0.261    | -4.16    |
| 1377772_at          | 0.99616     | -0.393   | 0.267    | -4.611   |
| 1397225_at          | 1.03662     | -0.51    | 0.259    | -5.483   |
| 1371090_at          | 0.96785     | -0.283   | 0.249    | -8.82    |
| 1373139_at          | 0.97924     | -0.196   | 0.27     | -5.753   |
| 1373950_at          | 1.01793     | -0.2     | 0.26     | -5.768   |
| 1375355_at          | 0.98721     | -0.396   | 0.256    | -3.349   |
| 1390828_at          | 0.95103     | -0.316   | 0.259    | -5.32    |
| 1378043_at          | 1.51691     | -1.412   | 0.253    | -2.697   |
| 1390010_at          | 0.99451     | -0.141   | 0.26     | -5.856   |

**Supplementary Table 2: Functional Categorizations of Probe Sets Showing Circadian Oscillations in Expression in Adipose Tissue**

| Probe ID     | Cluster | Accession No. | Symbol               | Gene Name                                               | Gene Function                                                         |
|--------------|---------|---------------|----------------------|---------------------------------------------------------|-----------------------------------------------------------------------|
| 1370510_a_at | 1       | AB012600      | <i>Arntl, Bmal1</i>  | Aryl hydrocarbon receptor nuclear translocator-like     | Circadian rhythm, E-box element binding                               |
| 1393568_at   | 1       | BF404793      | <i>Cugbp1</i>        | CUG triplet repeat, RNA binding protein 1               | pre-mRNA alternative splicing, mRNA editing, & translation            |
| 1368488_at   | 1       | NM_053727     | <i>Nfj13</i>         | Nuclear factor, interleukin 3 regulated                 | Transcription regulation, D box element binding                       |
| 1371832_at   | 1       | AW526333      | <i>Leo1</i>          | Leo1, Paf1/RNA polymerase II complex component, homolog | PAF protein complex, associates with RNA polymerase II                |
| 1390628_at   | 1       | AI010275      | <i>Cpeb2</i>         | Cytoplasmic polyadenylation element binding protein 2   | Regulates translation of target RNA                                   |
| 1383439_at   | 2       | BI278550      | <i>Npas2</i>         | Neuronal PAS domain protein 2                           | Circadian rhythm, E-box element binding                               |
| 1386833_at   | 2       | BF554138      | <i>Bcl6b*</i>        | B-cell CLL/lymphoma 6 member B                          | Sequence-specific transcriptional repressor associated with BCL6      |
| 1386832_a_at | 3       | BF554138      | <i>Bcl6b*</i>        | B-cell CLL/lymphoma 6 member B                          | Sequence-specific transcriptional repressor associated with BCL6      |
| 1378038_at   | 3       | BF393884      | <i>Ptbp2</i>         | Polypyrimidine tract binding protein 2                  | Regulation of Pre-mRNA splicing and translation                       |
| 1370209_at   | 4       | BE101336      | <i>Bteb1, Klf 9*</i> | Basic transcription element binding protein 1           | Progesterone & thyroid hormone transcriptional signaling              |
| 1370816_at   | 4       | M25804        | <i>Nr1d1</i>         | Nuclear receptor subfamily 1, group D, member 1         | Circadian rhythm, Steroid hormone receptor                            |
| 1370540_at   | 4       | U15660        | <i>Nr1d2*</i>        | Nuclear receptor subfamily 1, group D, member 2         | Circadian rhythm, Steroid hormone receptor                            |
| 1390430_at   | 4       | BF284190      | <i>Nr1d2*</i>        | Nuclear receptor subfamily 1, group D, member 2         | Circadian rhythm, Steroid hormone receptor                            |
| 1370541_at   | 4       | U20796        | <i>Nr1d2*</i>        | Nuclear receptor subfamily 1, group D, member 2         | Circadian rhythm, Steroid hormone receptor                            |
| 1378745_at   | 4       | BG374483      | <i>Per3</i>          | Period homolog 3                                        | Circadian rhythm, regulation of clock controlled genes                |
| 1369919_at   | 4       | NM_019194     | <i>TEF</i>           | Thyrotroph embryonic factor                             | Binds to and transactivates the TSHB promoter                         |
| 1383533_at   | 4       | AI715743      | <i>Rcor3</i>         | REST corepressor 3                                      | Transcription repression                                              |
| 1385904_at   | 4       | BG153342      | <i>Cirbp</i>         | Cold inducible RNA binding protein                      | Functions as an RNA chaperone under cold stress                       |
| 1392996_at   | 4       | BG668435      | <i>Cpeb1</i>         | Cytoplasmic polyadenylation element binding protein 1   | Translational activation of dormant RNAs                              |
| 1392149_at   | 4       | AA997766      | <i>Elf4</i>          | Eukaryotic translation initiation factor 4B             | Component of EIF4F complex - translation                              |
| 1371583_at   | 4       | AI598399      | <i>Rbm3</i>          | RNA binding motif (RNP1, RRM) protein 3                 | Functions as RNA chaperone                                            |
| 1371864_at   | 5       | AW524563      | <i>Bteb1, Klf 9*</i> | basic transcription element binding protein 1           | Progesterone & thyroid hormone transcriptional signaling              |
| 1390819_at   | 5       | BF419374      | <i>Tef*</i>          | Thyrotroph embryonic factor                             | Binds to and transactivates the TSHB promoter                         |
| 1385374_at   | 5       | AA997236      | <i>Tef*</i>          | Thyrotroph embryonic factor                             | Binds to and transactivates the TSHB promoter                         |
| 1387874_at   | 5       | AI230048      | <i>Dbbp</i>          | D site albumin promoter binding protein                 | Modulates the expression of clock output genes                        |
| 1393647_at   | 5       | BI285581      | <i>Hat1</i>          | Histone aminotransferase 1                              | Type B histone acetyltransferases                                     |
| 1368249_at   | 5       | NM_053536     | <i>Klf15</i>         | Kruppel-like factor 15                                  | Regulates cell proliferation, differentiation, & development          |
| 1390010_at   | 5       | AI454081      | <i>Ncoo1</i>         | Nuclear receptor coactivator 1                          | Coactivation of nuclear receptors                                     |
| 1374855_at   | 5       | BI279017      | <i>Per1</i>          | period homolog 1                                        | Circadian rhythm, regulation of clock controlled genes                |
| 1368303_at   | 5       | NM_031678     | <i>Per2</i>          | period homolog 2                                        | Circadian rhythm, regulation of clock controlled genes                |
| 1373950_at   | 5       | AI598911      | <i>Zfp496</i>        | Zinc finger protein 496                                 | Transcription regulation                                              |
| 1386641_at   | 5       | BF546770      | <i>Hlf*</i>          | Hepatic leukemia factor                                 | Regulates clock controlled genes through D-box element                |
| 1385585_at   | 5       | AI111674      | <i>Hlf*</i>          | Hepatic leukemia factor                                 | Regulates clock controlled genes through D-box element                |
| 1380306_at   | 5       | AW435415      | <i>Zbtb16</i>        | Zinc finger and BTB domain containing 16                | Zinc finger transcription factor - cell cycle progression             |
| 1398370_at   | 5       | AW522471      | <i>Adarb1</i>        | Adenosine deaminase, RNA-specific, B1                   | pre-mRNA editing, site-specific deamination of adenosines             |
| 1392557_at   | 5       | BF389151      | <i>Bicc1</i>         | Bicaudal C homolog 1                                    | RNA-binding protein, cell differentiation                             |
| 1383610_at   | 5       | BF386078      | <i>Eya2</i>          | Eyes absent 2, homolog                                  | Transcription activator, regulation of DNA repair process             |
| 1370991_at   | 6       | AF187814      | <i>Cmi3</i>          | Camello-like 3                                          | N-acetyltransferase regulating cell adhesion                          |
| 1367771_at   | 6       | NM_031345     | <i>Dsipi, Gilz</i>   | Delta sleep inducing peptide, immunoreact               | Negative regulator of adipogenesis                                    |
| 1385149_at   | 6       | AI502063      | <i>Mettl3</i>        | Methyltransferase-like 3                                | Posttranscriptional methylation of internal adenosines                |
| 1379369_at   | 6       | AI171526      | <i>Prickle1</i>      | Prickle-like 1                                          | Nuclear receptor for transcription factors                            |
| 1381157_at   | 6       | BF396928      | <i>Bnc 2</i>         | Basonuclin 2                                            | Nuclear processing of mRNA                                            |
| 1392640_at   | 7       | AI412155      | <i>Cry1</i>          | Cryptochrome 1                                          | Regulator of the circadian feedback loop                              |
| 1371505_at   | 7       | BG381750      | <i>Hnrpc</i>         | Heterogeneous nuclear ribonucleoprotein C               | Nuclear RNP; mRNA processing, metabolism & transport                  |
| 1377608_a_at | 7       | BM392298      | <i>Tardbp*</i>       | TAR DNA binding protein                                 | Regulation of transcription and mRNA splicing                         |
| 1371367_at   | 7       | BE107459      | <i>Tardbp*</i>       | TAR DNA binding protein                                 | Regulation of transcription and mRNA splicing                         |
| 1373708_at   | 7       | BG378168      | <i>Tut1</i>          | Terminal uridylyl transferase 1                         | Terminal uridylyltransferase & poly(A) polymerase; cell proliferation |
| 1373566_at   | 7       | AI103026      | <i>Irf2bp2*</i>      | Interferon regulatory factor 2 binding protein 2        | Interacts with transcriptional repression domain of IRF1              |
| 1380598_at   | 7       | AI101569      | <i>Irf2bp2*</i>      | Interferon regulatory factor 2 binding protein 2        | Interacts with transcriptional repression domain of IRF2              |

**Supplementary Table 2: Functional Categorizations of Probe Sets Showing Circadian Oscillations in Expression in Adipose Tissue**

| Probe ID                              | Cluster | Accession No. | Symbol                | Gene Name                                                              | Gene Function                                                    |
|---------------------------------------|---------|---------------|-----------------------|------------------------------------------------------------------------|------------------------------------------------------------------|
| <b>Signal Transduction</b>            |         |               |                       |                                                                        |                                                                  |
| 1377982_at                            | 1       | AW915930      | <i>Dtx4*</i>          | Deltex 4 homolog                                                       | Regulator of Notch signaling                                     |
| 1368486_at                            | 1       | NM_032074     | <i>Irs 3</i>          | Insulin receptor substrate 3                                           | Insulin signal transduction                                      |
| 1396053_at                            | 1       | BF555968      | <i>Ned9</i>           | Neural precursor cell expressed, developmentally down-regulated gene 9 | Tyrosine-kinase-based signaling related to cell adhesion         |
| 1373542_at                            | 1       | BW386306      | <i>Sphk2</i>          | Sphingosine kinase 2                                                   | Phosphorylation of sphingosine to sphingosine-1-phosphate        |
| 1374681_at                            | 1       | AW914967      | <i>Adcyap1r1</i>      | Adenylate cyclase activating polypeptide 1 receptor 1                  | Mediates biological actions of ADCYAP1                           |
| 1391808_at                            | 1       | AI535140      | <i>Arrdc4</i>         | Arrestin domain containing 4                                           | Inhibition of glucose uptake                                     |
| 1373114_at                            | 2       | AI408442      | <i>Dtx4*</i>          | Deltex 4 homolog                                                       | Regulator of Notch signaling                                     |
| 1373399_at                            | 2       | BI291997      | <i>Wdr6</i>           | WD repeat domain 6                                                     | Insulin/IGF-1 signaling                                          |
| 1370570_at                            | 3       | AF016296      | <i>Nrp1</i>           | Neuropilin 1                                                           | Membrane bound co-receptor for VEGF & semaphorin                 |
| 1383263_at                            | 3       | BG664221      | <i>Ogn</i>            | Osteoglycin                                                            | Regulates type I collagen fibrillogenesis                        |
| 1381469_a_at                          | 3       | AW526967      | <i>Perq1</i>          | PERQ amino acid rich, with GYF domain 1                                | Regulates tyrosine kinase receptor signaling                     |
| 1384386_at                            | 3       | BF287084      | <i>Rasa2</i>          | RAS p21 protein activator 2                                            | Suppressor of RAS function                                       |
| 1388002_at                            | 3       | AF084205      | <i>Taok1</i>          | TAO kinase 1                                                           | Phosphorylates MKK3 & activates p38 MAP kinase pathway           |
| 1386566_at                            | 3       | BF558962      | <i>Ppp2r3c</i>        | Protein phosphatase 2, regulatory subunit B, gamma                     | Regulates MCM3AP phosphorylation                                 |
| 1377772_at                            | 4       | BI295864      | <i>Tmeff1</i>         | Transmembrane protein with EGF-like and two follistatin-like domains 1 | Inhibits NODAL & BMP signaling                                   |
| 1372590_at                            | 4       | BW386449      | <i>C1qtnf1, Ctrp1</i> | C1q-tumor necrosis factor related protein 1                            | Adiponectin-like function                                        |
| 1375692_at                            | 5       | AI229025      | <i>Mgk1</i>           | Mitogen activated protein kinase 1                                     | Signalling - many cellular processes                             |
| 1390828_at                            | 5       | BI395810      | <i>Npy1r</i>          | Neuropeptide Y receptor Y1                                             | Receptor for neuropeptide Y & peptide YY                         |
| 1374307_at                            | 6       | AI236027      | <i>Camk2n1</i>        | CaM-kinase II inhibitor alpha                                          | Specific inhibitor of CaM-kinase II                              |
| 1374706_at                            | 6       | BF407916      | <i>Gdf11</i>          | Growth differentiation factor 11                                       | Regulator of cell growth & differentiation                       |
| 1368681_at                            | 6       | NM_012636     | <i>Pthlh</i>          | Parathyroid hormone-like peptide                                       | Trans epithelial calcium transport; tissue proliferation         |
| 1392927_at                            | 6       | BG381724      | <i>Paq4</i>           | Progesterin and adipooQ receptor family member IV                      | Mediator of non-genomic steroid action & adiponectin activity    |
| 1368662_at                            | 6       | NM_033230     | <i>Akt1</i>           | v-akt murine thymoma viral oncogene homolog 1                          | Critical regulator of cell survival pathways & insulin signaling |
| 1373403_at                            | 6       | AI230625      | <i>C8orf4</i>         | Chromosome 8 open reading frame 4                                      | Positive regulator of Wnt/beta-catenin signaling pathway         |
| 1391577_at                            | 7       | BI293450      | <i>Pgam5</i>          | Phosphoglycerate mutase family member 5                                | protein serine/threonine phosphatase, activates ASK1             |
| <b>Inflammation / Immune Response</b> |         |               |                       |                                                                        |                                                                  |
| 1387631_at                            | 1       | NM_024390     | <i>Hpgd</i>           | 15-hydroxyprostaglandin dehydrogenase                                  | Prostaglandin inactivation                                       |
| 1368200_at                            | 1       | NM_134455     | <i>Cx3cl1</i>         | Chemokine (C-X3-C motif) ligand 1                                      | Chemoattracts T cells and monocytes                              |
| 1375908_at                            | 1       | BI282616      | <i>Eva</i>            | Epithelial V-like antigen                                              | Adhesion molecule - thymus development                           |
| 1367850_at                            | 1       | NM_053843     | <i>Fcgr 2*</i>        | Fc gamma receptor II                                                   | Low affinity receptor for IgG molecules                          |
| 1398246_s_at                          | 1       | NM_053843     | <i>Fcgr 2*</i>        | Fc gamma receptor II                                                   | Low affinity receptor for IgG molecules                          |
| 1368527_at                            | 5       | U03389        | <i>Ptgs2</i>          | Prostaglandin-endoperoxide synthase 2                                  | Prostaglandin biosynthesis,                                      |
| 1393917_at                            | 6       | BF555488      | <i>CD163*</i>         | CD 163 antigen                                                         | Scavenger receptor for Hb-Hp, activated macrophage marker        |
| 1379716_at                            | 6       | AA956555      | <i>CD163*</i>         | CD 163 antigen                                                         | Scavenger receptor for Hb-Hp, activated macrophage marker        |
| 1370445_at                            | 6       | D88666        | <i>Psplg1</i>         | Phosphatidylserine-specific phospholipase A1                           | Stimulates histamine production                                  |
| <b>Cell Cycle / Apoptosis</b>         |         |               |                       |                                                                        |                                                                  |
| 1388674_at                            | 1       | AI010427      | <i>Cdkn1a, p21</i>    | Cyclin-dependent kinase inhibitor 1A                                   | Negative regulation of cell cycle                                |
| 1376071_at                            | 1       | BW389326      | <i>Mcc</i>            | Mutated in colorectal cancers                                          | Tumor suppressor, negative regulator of cell cycle progression   |
| 1395377_at                            | 3       | BE107113      | <i>Bfar</i>           | Bifunctional apoptosis regulator                                       | Blocks both the extrinsic & intrinsic apoptosis pathways         |
| 1382118_at                            | 4       | BE104676      | <i>Peg3*</i>          | paternally expressed 3                                                 | Tumor suppressor activity & apoptosis inducer                    |
| 1372390_at                            | 4       | AI710604      | <i>Peg3*</i>          | paternally expressed 3                                                 | Tumor suppressor activity & apoptosis inducer                    |
| 1375760_at                            | 4       | AI070270      | <i>Tob2</i>           | Transducer of ERBB2, 2                                                 | Inhibits cell cycle progression from G0/G1 to S phases           |
| 1397409_s_at                          | 5       | BE113999      | <i>Wee1*</i>          | Wee 1 homolog                                                          | Critical regulator of G2-to-M transition                         |
| 1385973_at                            | 5       | AI717265      | <i>Wee1*</i>          | Wee 1 homolog                                                          | Critical regulator of G2-to-M transition                         |
| 1398434_at                            | 6       | BE107465      | <i>Datf1</i>          | Death associated transcription factor 1                                | Tumor suppressor gene with pro-apoptotic property                |

**Supplementary Table 2: Functional Categorizations of Probe Sets Showing Circadian Oscillations in Expression in Adipose Tissue**

| Probe ID                            | Cluster | Accession No. | Symbol                | Gene Name                                                                                  | Gene Function                                                    |
|-------------------------------------|---------|---------------|-----------------------|--------------------------------------------------------------------------------------------|------------------------------------------------------------------|
| <b>Cell Cycle / Apoptosis</b>       |         |               |                       |                                                                                            |                                                                  |
| 1370963_at                          | 6       | AI131902      | <i>Gas7</i>           | Growth arrest specific 7                                                                   | Maturation & differentiation of cerebellar neurons               |
| 1374036_at                          | 6       | AI229508      | <i>Mcm2</i>           | Minichromosome maintenance deficient 2 mitotin                                             | Initiation of eukaryotic genome replication                      |
| 1376947_at                          | 6       | AI178158      | <i>Rbbp6</i>          | Retinoblastoma binding protein 6                                                           | Negative regulator of p53                                        |
| 1376440_at                          | 6       | BF391522      | <i>Rnf139</i>         | Ring finger protein 139                                                                    | Tumor suppressor                                                 |
| 1372426_at                          | 6       | AI411997      | <i>Tsrc1</i>          | Thrombospondin repeat-containing protein 1                                                 | Positive regulation of apoptosis                                 |
| <b>Protein Processing</b>           |         |               |                       |                                                                                            |                                                                  |
| 1368882_at                          | 2       | NM_019123     | <i>Siat7c</i>         | Sialyltransferase 7c                                                                       | Sialylation of glycoproteins in Golgi                            |
| 1398597_at                          | 2       | AI044699      | <i>Rnf144a*</i>       | Ring finger protein 144A                                                                   | Ubiquitin proteasome pathway                                     |
| 1395629_at                          | 2       | BE105336      | <i>Rnf144a*</i>       | ring finger protein 144A                                                                   | Ubiquitin proteasome pathway                                     |
| 1388901_at                          | 5       | AW534837      | <i>Fkbp5*</i>         | FK506 binding protein 5                                                                    | Protein folding and trafficking                                  |
| 1380611_at                          | 5       | BI284255      | <i>Fkbp5*</i>         | FK506 binding protein 5                                                                    | Protein folding and trafficking                                  |
| 1398819_at                          | 7       | NM_022954     | <i>Dnaja1, Hsp40*</i> | DnaJ-like protein                                                                          | Protein translation, folding, translocation & degradation        |
| 1366882_at                          | 7       | BG668811      | <i>Dnaja1, Hsp40*</i> | DnaJ-like protein                                                                          | Protein translation, folding, translocation & degradation        |
| 1389844_at                          | 7       | BE113154      | <i>Fkbp4, Hsp56</i>   | FK506 binding protein 4                                                                    | Protein folding and trafficking                                  |
| 1370912_at                          | 7       | BI278231      | <i>Hspa1b, Hsp72</i>  | Heat shock 70kD protein 1B                                                                 | Protein stabilization & folding                                  |
| 1370283_at                          | 7       | M14050        | <i>Hspa5</i>          | Heat shock 70kD protein 5                                                                  | Protein folding and trafficking                                  |
| 1388898_at                          | 7       | AI236601      | <i>Hsp105</i>         | Heat shock protein 105                                                                     | Prevents aggregation of denatured proteins, cell stress          |
| 1398877_at                          | 7       | BI283691      | <i>Stip1</i>          | Stress-induced-phosphoprotein 1                                                            | Mediates association of molecular chaperones HSC70 and HSP90     |
| 1381528_at                          | 7       | BF387076      | <i>St3gal2</i>        | ST3 beta-galactoside alpha-2,3-sialyltransferase 2                                         | Sialylation of glycoproteins in golgi                            |
| <b>Lipid Metabolism</b>             |         |               |                       |                                                                                            |                                                                  |
| 1368189_at                          | 1       | NM_022389     | <i>Dhcr7</i>          | 7-dehydrocholesterol reductase                                                             | Cholesterol biosynthesis                                         |
| 1367857_at                          | 1       | NM_053445     | <i>Fads1</i>          | Fatty acid desaturase 1                                                                    | Biosynthesis of highly unsaturated fatty acids                   |
| 1381840_at                          | 3       | BF402893      | <i>Etfb</i>           | Electron-transfer-flavoprotein, beta polypeptide                                           | Mitochondrial fatty acid & amino acid catabolism                 |
| 1375355_at                          | 3       | AI763565      | <i>Mgll</i>           | Monoglyceride lipase                                                                       | Hydrolyze intracellular triglyceride                             |
| 1375209_at                          | 5       | AA893228      | <i>Osbp11</i>         | Oxysterol binding protein-like 11                                                          | Involved in lipid & carbohydrate metabolism                      |
| 1368177_at                          | 7       | NM_057107     | <i>Acs13</i>          | Acyl-CoA synthetase long-chain family member 3                                             | Lipid biosynthesis & fatty acid degradation                      |
| <b>Cytoskeleton / Extracellular</b> |         |               |                       |                                                                                            |                                                                  |
| 1368571_at                          | 1       | NM_021997     | <i>Cyln2</i>          | Cytoplasmic linker 2                                                                       | Regulates microtubule dynamics & dynein transport                |
| 1373718_at                          | 1       | BM384071      | <i>Tubb2a</i>         | Tubulin, beta 2a                                                                           | Major constituent of microtubules                                |
| 1370847_at                          | 1       | AA801238      | <i>Spond2</i>         | Spondin 2                                                                                  | Extracellular matrix protein                                     |
| 1393730_at                          | 1       | BI277836      | <i>Adamts4</i>        | Disintegrin-like & metalloproteinase (reprolysin type) with thrombospondin type 1 motif, 4 | Degradation of protein aggregates                                |
| 1371090_at                          | 2       | BM387006      | <i>Scamp2</i>         | Secretory carrier membrane protein 2                                                       | Carriers to cell surface in post-Golgi recycling pathways        |
| 1385382_at                          | 2       | BI294158      | <i>Adam19</i>         | Disintegrin and metalloproteinase domain 19                                                | Cell-cell & cell-matrix interaction                              |
| 1370266_at                          | 3       | BE115857      | <i>Parva</i>          | Parvin, alpha                                                                              | Actin-binding proteins associated with focal contacts            |
| 1391187_at                          | 5       | BI303019      | <i>Ppl</i>            | Periplakin                                                                                 | Component of desmosomes                                          |
| 1385229_at                          | 5       | AW524146      | <i>Pcdh20*</i>        | Protocadherin 20                                                                           | Calcium-dependent cell-adhesion                                  |
| 1391208_at                          | 5       | BG379836      | <i>Pcdh20*</i>        | Protocadherin 20                                                                           | Calcium-dependent cell-adhesion                                  |
| 1371913_at                          | 5       | BG379319      | <i>Tgfb1</i>          | Transforming growth factor, beta induced                                                   | Binds to type I, II, and IV collagens; cell-collagen interaction |
| 1382732_at                          | 6       | BE116084      | <i>Xlkad1*</i>        | Extra cellular link domain-containing 1                                                    | Binds to both soluble & immobilized hyaluronan                   |
| 1382192_at                          | 6       | AI179260      | <i>Xlkad1*</i>        | Extra cellular link domain-containing 1                                                    | Binds to both soluble & immobilized hyaluronan                   |
| 1394824_at                          | 7       | BF398348      | <i>Igfa11</i>         | Integrin, alpha 11                                                                         | Binding to collagen                                              |



**Supplementary Table 2: Functional Categorizations of Probe Sets Showing Circadian Oscillations in Expression in Adipose Tissue**

| Probe ID                            | Cluster     | Accession No. | Symbol                        | Gene Name                                                  | Gene Function                                                |
|-------------------------------------|-------------|---------------|-------------------------------|------------------------------------------------------------|--------------------------------------------------------------|
| <b>Cytoskeleton / Extracellular</b> |             |               |                               |                                                            |                                                              |
| 1373816_at                          | 7           | BW3883443     | <i>Ap1g1</i>                  | Adaptor-related protein complex 1, gamma 1 subunit         | Protein sorting in late-Golgi/trans-Golgi network            |
| 1372091_at                          | 7           | BI275959      | <i>Mig12</i>                  | MID1 interacting G12-like protein                          | Stabilization of microtubules                                |
| 1370954_at                          | 7           | BI274401      | <i>P4ha1</i>                  | Prolyl 4-hydroxylase, alpha 1 subunit                      | Post-translational formation of 4-hydroxyproline in collagen |
| <b>Transport</b>                    |             |               |                               |                                                            |                                                              |
| 1388064_a_at                        | 3           | AF265360      | <i>Slc1a3</i>                 | Solute carrier family 1, member 3                          | Transports L-glutamate & L- and D-aspartate                  |
| 1398255_at                          | 5           | NM_031672     | <i>Slc15a2</i> , <i>Pept2</i> | Solute carrier family 15, member 2                         | Proton-coupled intake of oligopeptides                       |
| 1398635_at                          | 5           | BF565662      | <i>Slc10a6</i>                | Solute carrier family 10, member 6                         | Transport of steroid sulfates                                |
| 1374531_at                          | 5           | AA926305      | <i>Slc6a6</i>                 | Solute carrier family 6, member 6                          | Uptake of taurine                                            |
| <b>Miscellaneous</b>                |             |               |                               |                                                            |                                                              |
| 1392579_at                          | 1           | BI295501      | <i>Obfc2a</i>                 | Oligonucleotide/oligosaccharide-binding fold containing 2A | Single-stranded nucleic acid binding                         |
| 1377635_at                          | 5           | BW389350      | <i>Fmo2*</i>                  | Flavin containing monooxygenase 2                          | Oxidation of drugs and xenobiotics                           |
| 1379467_at                          | 5           | BF284065      | <i>Fmo2*</i>                  | Flavin containing monooxygenase 2                          | Oxidation of drugs and xenobiotics                           |
| 1382031_at                          | 5           | AA859079      | <i>Fmo2*</i>                  | Flavin containing monooxygenase 2                          | Oxidation of drugs and xenobiotics                           |
| 1368304_at                          | 5           | NM_053433     | <i>Fmo3</i>                   | Flavin containing monooxygenase 3                          | Oxidation of drugs and xenobiotics                           |
| 1384106_at                          | 5           | AW141276      | <i>SGMS1</i>                  | Sphingomyelin synthase 1                                   | Sphingomyelin production                                     |
| 1373139_at                          | 5           | AI012608      | <i>Vkorc11</i>                | Vitamin K epoxide reductase complex, subunit 1-like 1      | Vitamin K metabolism                                         |
| 1397766_at                          | 5           | BI291982      | <i>Sgms2</i>                  | Sphingomyelin synthase 2                                   | Sphingomyelin production                                     |
| 1367568_a_at                        | 6           | NM_012862     | <i>Mgp</i>                    | Matrix Gla protein                                         | Inhibitor of bone formation                                  |
| 1393075_at                          | 7           | BF386199      | <i>Lomr3</i>                  | LON peptidase N-terminal domain and ring finger 3          | Protein-protein and protein-DNA interactions                 |
| <b>EST/Unknown</b>                  |             |               |                               |                                                            |                                                              |
| 1389284_at                          | 1           | BI275747      | <i>EST</i>                    | ---                                                        | ---                                                          |
| 1383518_at                          | 1           | AI137914      | <i>EST</i>                    | ---                                                        | ---                                                          |
| 1381409_at                          | 1           | AA963978      | <i>EST</i>                    | ---                                                        | ---                                                          |
| 1389199_at                          | 1           | AI407536      | <i>EST</i>                    | ---                                                        | ---                                                          |
| 1389456_at                          | 1           | BI296591      | <i>EST</i>                    | ---                                                        | ---                                                          |
| 1395663_at                          | 1           | BW390763      | <i>Mall mal</i>               | Mal, T-cell differentiation protein-like                   | ---                                                          |
| 1372086_at                          | 1           | BW387251      | <i>Fhdcl</i>                  | FH2 domain containing 1                                    | ---                                                          |
| 1378043_at                          | 2           | AW532890      | <i>EST</i>                    | ---                                                        | ---                                                          |
| 1391553_at                          | 3           | AA956757      | <i>EST</i>                    | ---                                                        | ---                                                          |
| 1383004_at                          | 3           | BF397074      | <i>Ahcy1</i>                  | S-adenosylhomocysteine hydrolase-like 1                    | ---                                                          |
| 1397251_at                          | 3           | BF389812      | <i>Ammeccr1</i>               | AMME chromosomal region gene 1-like                        | ---                                                          |
| 1369433_at                          | Unclustered | NM_021741     | <i>Cep78</i>                  | Centrosomal protein 78kDa                                  | ---                                                          |
| 1386097_at                          | Unclustered | AW527230      | <i>Ankrd12</i>                | Ankyrin repeat domain 12                                   | ---                                                          |
| 1392344_at                          | 4           | AI709455      | <i>EST</i>                    | ---                                                        | ---                                                          |
| 1389911_at                          | 4           | BW389126      | <i>Metrl</i>                  | Metetrin, glial cell differentiation regulator-like        | ---                                                          |
| 1388525_at                          | 4           | BE112999      | <i>Pik3ip1</i>                | Phosphoinositide-3-kinase interacting protein 1            | ---                                                          |
| 1373239_at                          | 4           | BW390617      | <i>Sh3px3</i> , <i>Snx33</i>  | Sorting nexin 33                                           | ---                                                          |
| 1393610_at                          | 4           | AI137173      | <i>Fam 76A</i>                | Family with sequence similarity 76, member A               | ---                                                          |
| 1373960_at                          | 4           | AI235631      | <i>Tnrm120a</i>               | Transmembrane protein 120A                                 | ---                                                          |
| 1379971_at                          | 4           | BE102241      | <i>Zc3h6</i>                  | Zinc finger CCHH type containing 6                         | ---                                                          |
| 1397225_at                          | 5           | AA875647      | <i>EST</i>                    | ---                                                        | ---                                                          |

**Supplementary Table 2: Functional Categorizations of Probe Sets Showing Circadian Oscillations in Expression in Adipose Tissue**

| Probe ID           | Cluster | Accession No. | Symbol       | Gene Name                                                          | Gene Function |
|--------------------|---------|---------------|--------------|--------------------------------------------------------------------|---------------|
| <b>EST/Unknown</b> |         |               |              |                                                                    |               |
| 1388949_at         | 5       | BI297693      | EST          | ---                                                                | ---           |
| 1378105_at         | 5       | BF289201      | EST          | ---                                                                | ---           |
| 1384209_at         | 5       | BI295835      | EST          | ---                                                                | ---           |
| 1373158_at         | 5       | AI170446      | EST          | ---                                                                | ---           |
| 1388945_at         | 5       | BM385779      | EST          | ---                                                                | ---           |
| 1384110_at         | 5       | AI045668      | EST          | ---                                                                | ---           |
| 1378156_at         | 5       | BE109002      | LOC690489    | Similar to cystin 1                                                | ---           |
| 1376465_at         | 5       | BI295240      | ZNF704, Gig1 | Glucocorticoid-induced gene 1                                      | ---           |
| 1373093_at         | 5       | AI169756      | Errf1        | ERBB receptor feedback inhibitor 1                                 | ---           |
| 1382266_at         | 5       | AI500893      | Gpr146       | Orphan receptor                                                    | ---           |
| 1392510_at         | 5       | BF283618      | Fam180a      | Family with sequence similarity 180, member A                      | ---           |
| 1376177_at         | 5       | AI179609      | Fam117a      | Family with sequence similarity 117, member A                      | ---           |
| 1396417_at         | 6       | BF390967      | EST          | ---                                                                | ---           |
| 1395859_at         | 6       | BI293415      | EST          | ---                                                                | ---           |
| 1379477_at         | 6       | AI555261      | EST          | ---                                                                | ---           |
| 1379051_at         | 6       | AW528292      | EST          | ---                                                                | ---           |
| 1372491_at         | 6       | AI229647      | EST          | ---                                                                | ---           |
| 1389020_at         | 6       | BM389149      | LOC686539    | Immunoglobulin superfamily containing leucine-rich repeat          | ---           |
| 1398662_at         | 7       | AA901088      | EST          | ---                                                                | ---           |
| 1393696_at         | 7       | AA818846      | EST          | ---                                                                | ---           |
| 1376858_at         | 7       | BI281836      | LOC686809    | Similar to protein 7 transactivated by hepatitis B virus X antigen | ---           |
| 1398365_at         | 7       | AI171466      | Tppp3        | Tubulin polymerization-promoting protein family member 3           | ---           |

\* Genes represented by multiple probe sets.

Supplementary Table 3: Mean Normalized Intensities of Individual Probe Sets Mined for Circadian Oscillations.

| Time (Hr)           | 0.25 | 1    | 2    | 4    | 6    | 8    | 10   | 11   |
|---------------------|------|------|------|------|------|------|------|------|
| <b>Probe set ID</b> |      |      |      |      |      |      |      |      |
| 1398877_at          | 1.22 | 1.22 | 1.22 | 0.91 | 0.88 | 0.82 | 0.69 | 0.88 |
| 1398819_at          | 1.33 | 1.22 | 0.94 | 0.76 | 0.68 | 0.71 | 0.79 | 0.93 |
| 1398662_at          | 1.24 | 1.23 | 1.05 | 0.97 | 0.89 | 0.86 | 0.85 | 0.64 |
| 1398635_at          | 1.00 | 0.87 | 0.68 | 0.79 | 0.71 | 0.97 | 1.34 | 1.31 |
| 1398597_at          | 0.96 | 1.25 | 1.43 | 1.95 | 1.42 | 1.39 | 1.07 | 0.90 |
| 1398434_at          | 0.98 | 0.96 | 0.68 | 0.87 | 0.70 | 0.69 | 0.71 | 0.79 |
| 1398370_at          | 0.69 | 0.91 | 0.78 | 0.67 | 0.67 | 0.78 | 0.89 | 1.20 |
| 1398365_at          | 1.14 | 1.21 | 1.10 | 0.91 | 0.58 | 0.83 | 0.61 | 0.89 |
| 1398255_at          | 0.69 | 0.63 | 0.57 | 0.91 | 0.75 | 0.92 | 1.15 | 1.48 |
| 1398246_s_at        | 1.94 | 2.02 | 1.69 | 1.74 | 0.99 | 0.60 | 0.61 | 0.68 |
| 1397766_at          | 0.90 | 0.87 | 0.80 | 0.81 | 0.64 | 0.98 | 1.15 | 1.18 |
| 1397409_s_at        | 0.97 | 0.91 | 0.61 | 0.61 | 0.39 | 0.57 | 0.80 | 1.15 |
| 1397251_at          | 0.99 | 0.93 | 1.08 | 1.16 | 1.30 | 1.21 | 1.15 | 1.20 |
| 1397225_at          | 0.48 | 0.61 | 0.71 | 0.52 | 0.59 | 0.91 | 0.92 | 1.46 |
| 1396417_at          | 0.98 | 1.03 | 0.86 | 0.64 | 0.80 | 0.77 | 0.85 | 0.84 |
| 1396053_at          | 1.15 | 1.34 | 1.31 | 1.34 | 0.93 | 0.81 | 0.91 | 0.86 |
| 1395859_at          | 1.09 | 1.05 | 0.63 | 0.71 | 0.58 | 0.73 | 0.87 | 1.01 |
| 1395663_at          | 1.14 | 1.16 | 1.18 | 1.34 | 1.02 | 1.03 | 0.94 | 0.90 |
| 1395629_at          | 1.18 | 1.43 | 1.77 | 1.96 | 1.59 | 1.33 | 1.09 | 0.70 |
| 1395377_at          | 1.05 | 0.79 | 1.08 | 1.18 | 1.21 | 1.35 | 1.13 | 1.20 |
| 1394824_at          | 1.05 | 1.03 | 1.04 | 0.95 | 0.80 | 0.82 | 0.69 | 0.86 |
| 1393917_at          | 0.79 | 0.89 | 0.57 | 0.80 | 0.48 | 0.53 | 0.73 | 0.98 |
| 1393730_at          | 1.28 | 1.32 | 1.26 | 1.39 | 1.21 | 0.95 | 0.75 | 0.54 |
| 1393696_at          | 1.37 | 1.18 | 0.99 | 0.87 | 0.84 | 0.90 | 0.77 | 0.87 |
| 1393647_at          | 0.85 | 0.88 | 0.87 | 0.93 | 0.92 | 0.93 | 0.95 | 1.09 |
| 1393610_at          | 0.85 | 0.93 | 0.87 | 1.11 | 1.11 | 1.12 | 1.26 | 1.16 |
| 1393568_at          | 1.19 | 1.09 | 1.25 | 0.98 | 1.11 | 0.95 | 0.86 | 0.90 |
| 1393075_at          | 1.47 | 0.92 | 1.09 | 1.06 | 0.76 | 0.52 | 0.50 | 0.28 |
| 1392996_at          | 0.76 | 0.82 | 0.90 | 0.90 | 0.75 | 1.14 | 1.28 | 1.59 |
| 1392927_at          | 0.90 | 0.94 | 0.77 | 0.92 | 0.74 | 0.90 | 0.92 | 0.91 |
| 1392640_at          | 1.43 | 1.43 | 1.37 | 0.87 | 0.59 | 0.43 | 0.45 | 0.50 |
| 1392579_at          | 1.27 | 1.26 | 1.58 | 1.13 | 0.83 | 0.80 | 0.61 | 0.61 |
| 1392557_at          | 0.71 | 0.99 | 0.57 | 0.72 | 0.62 | 0.81 | 0.89 | 1.07 |
| 1392510_at          | 0.85 | 0.66 | 0.73 | 0.80 | 0.94 | 0.88 | 1.16 | 1.13 |
| 1392344_at          | 0.81 | 0.83 | 0.97 | 0.99 | 0.97 | 1.24 | 1.30 | 1.33 |
| 1392149_at          | 0.71 | 0.61 | 0.50 | 0.80 | 0.84 | 1.39 | 1.70 | 2.32 |
| 1391808_at          | 1.24 | 1.29 | 0.94 | 1.20 | 1.21 | 0.98 | 0.98 | 0.86 |
| 1391577_at          | 1.09 | 1.08 | 1.04 | 0.96 | 0.94 | 0.88 | 0.82 | 0.94 |
| 1391553_at          | 1.25 | 1.38 | 1.22 | 1.20 | 1.46 | 1.41 | 1.37 | 1.20 |
| 1391208_at          | 0.64 | 0.48 | 0.37 | 0.78 | 0.54 | 0.97 | 1.17 | 0.89 |
| 1391187_at          | 0.53 | 0.64 | 0.40 | 0.58 | 0.51 | 0.70 | 1.21 | 1.64 |
| 1390828_at          | 0.66 | 0.73 | 0.53 | 0.71 | 0.66 | 0.94 | 0.93 | 1.37 |

Supplementary Table 2: Mean Normalized Intensities of Individual Probe Sets Mined for Circadian Oscillations.

| Time (Hr)           | 0.25 | 1    | 2    | 4    | 6    | 8    | 10   | 11   |
|---------------------|------|------|------|------|------|------|------|------|
| <b>Probe set ID</b> |      |      |      |      |      |      |      |      |
| 1390819_at          | 0.69 | 0.54 | 0.62 | 0.52 | 0.63 | 1.04 | 1.24 | 1.56 |
| 1390628_at          | 1.14 | 1.21 | 1.82 | 1.27 | 1.10 | 0.97 | 0.69 | 0.67 |
| 1390430_at          | 0.26 | 0.34 | 0.41 | 0.55 | 0.95 | 2.02 | 1.88 | 2.25 |
| 1390010_at          | 0.97 | 0.93 | 0.80 | 0.82 | 0.86 | 0.95 | 1.01 | 0.96 |
| 1389911_at          | 0.75 | 0.78 | 0.72 | 0.94 | 0.88 | 1.22 | 1.46 | 1.75 |
| 1389844_at          | 1.15 | 1.16 | 1.03 | 0.87 | 0.72 | 0.87 | 0.60 | 0.78 |
| 1389456_at          | 1.29 | 1.10 | 1.17 | 1.15 | 1.07 | 1.15 | 0.81 | 0.89 |
| 1389284_at          | 0.97 | 1.59 | 1.36 | 1.89 | 1.20 | 1.26 | 0.76 | 0.99 |
| 1389199_at          | 1.63 | 1.46 | 0.99 | 1.12 | 1.04 | 0.89 | 0.73 | 0.76 |
| 1389020_at          | 0.84 | 0.88 | 0.84 | 0.93 | 0.66 | 0.72 | 0.79 | 0.99 |
| 1388949_at          | 0.64 | 0.97 | 0.75 | 0.88 | 0.80 | 0.99 | 1.18 | 1.18 |
| 1388945_at          | 0.98 | 0.96 | 0.81 | 0.82 | 0.77 | 0.93 | 1.06 | 1.07 |
| 1388901_at          | 0.65 | 0.79 | 0.77 | 0.64 | 0.64 | 0.72 | 0.83 | 1.21 |
| 1388898_at          | 1.39 | 1.48 | 1.25 | 0.78 | 0.65 | 0.64 | 0.55 | 0.62 |
| 1388674_at          | 1.34 | 1.09 | 1.21 | 1.20 | 1.00 | 0.83 | 0.62 | 0.60 |
| 1388525_at          | 0.52 | 0.69 | 0.70 | 0.61 | 0.75 | 1.32 | 1.31 | 1.29 |
| 1388064_a_at        | 0.90 | 1.10 | 1.23 | 1.25 | 1.27 | 1.42 | 1.15 | 1.25 |
| 1388002_at          | 1.18 | 1.05 | 1.34 | 1.38 | 1.48 | 1.46 | 0.98 | 0.92 |
| 1387874_at          | 0.31 | 0.28 | 0.27 | 0.27 | 0.56 | 1.79 | 2.51 | 4.25 |
| 1387631_at          | 1.18 | 1.52 | 1.12 | 1.09 | 1.07 | 1.02 | 0.91 | 0.72 |
| 1386833_at          | 1.18 | 1.20 | 1.04 | 1.46 | 1.18 | 1.09 | 1.16 | 1.12 |
| 1386832_a_at        | 1.18 | 1.11 | 1.05 | 1.46 | 1.24 | 1.20 | 1.14 | 1.22 |
| 1386641_at          | 0.52 | 0.53 | 0.97 | 0.54 | 0.65 | 0.89 | 0.82 | 0.87 |
| 1386566_at          | 1.06 | 1.19 | 1.03 | 1.16 | 1.08 | 1.14 | 1.15 | 1.01 |
| 1386097_at          | 0.83 | 0.91 | 0.93 | 1.12 | 1.15 | 1.28 | 1.24 | 1.16 |
| 1385973_at          | 0.32 | 0.21 | 0.18 | 0.08 | 0.17 | 0.11 | 0.41 | 1.85 |
| 1385904_at          | 0.77 | 0.72 | 0.91 | 1.18 | 1.26 | 1.31 | 1.18 | 1.47 |
| 1385585_at          | 0.51 | 0.64 | 0.80 | 0.47 | 0.55 | 0.84 | 0.73 | 1.01 |
| 1385382_at          | 1.15 | 1.61 | 1.52 | 2.08 | 2.21 | 1.72 | 0.98 | 0.67 |
| 1385374_at          | 0.74 | 0.79 | 0.75 | 0.61 | 0.66 | 0.98 | 0.98 | 1.30 |
| 1385229_at          | 0.59 | 0.46 | 0.46 | 0.89 | 0.54 | 1.10 | 1.18 | 1.24 |
| 1385149_at          | 1.11 | 0.89 | 0.92 | 0.75 | 0.74 | 0.94 | 0.89 | 0.92 |
| 1384386_at          | 0.97 | 0.99 | 0.92 | 1.45 | 1.59 | 1.61 | 1.40 | 1.01 |
| 1384209_at          | 0.86 | 0.57 | 0.49 | 0.59 | 0.87 | 0.73 | 1.31 | 1.39 |
| 1384110_at          | 0.73 | 0.83 | 0.61 | 0.63 | 0.51 | 1.10 | 0.93 | 1.15 |
| 1384106_at          | 0.95 | 0.92 | 0.85 | 0.78 | 0.77 | 0.98 | 0.97 | 1.04 |
| 1383610_at          | 0.79 | 0.93 | 0.60 | 0.76 | 0.78 | 0.89 | 0.90 | 1.13 |
| 1383533_at          | 0.86 | 0.90 | 0.89 | 0.93 | 0.96 | 1.20 | 1.15 | 1.25 |
| 1383518_at          | 1.27 | 1.36 | 1.45 | 1.30 | 1.08 | 1.01 | 0.78 | 0.83 |
| 1383439_at          | 2.45 | 1.58 | 2.12 | 2.06 | 2.04 | 1.20 | 0.80 | 0.51 |
| 1383263_at          | 0.72 | 0.96 | 1.10 | 1.21 | 1.21 | 1.16 | 1.25 | 1.24 |
| 1383004_at          | 1.15 | 1.08 | 1.14 | 1.20 | 1.31 | 1.12 | 1.10 | 1.07 |

Supplementary Table 2: Mean Normalized Intensities of Individual Probe Sets Mined for Circadian Oscillations.

| Time (Hr)           | 0.25 | 1    | 2    | 4    | 6    | 8    | 10   | 11   |
|---------------------|------|------|------|------|------|------|------|------|
| <b>Probe set ID</b> |      |      |      |      |      |      |      |      |
| 1382732_at          | 0.82 | 1.03 | 0.59 | 0.70 | 0.56 | 0.54 | 0.75 | 1.15 |
| 1382266_at          | 0.69 | 0.57 | 0.70 | 0.80 | 0.68 | 1.28 | 1.40 | 1.72 |
| 1382192_at          | 0.84 | 0.97 | 0.65 | 0.75 | 0.59 | 0.66 | 0.80 | 1.16 |
| 1382118_at          | 0.61 | 0.55 | 0.82 | 1.47 | 1.30 | 1.55 | 1.69 | 1.53 |
| 1382031_at          | 1.08 | 0.38 | 0.48 | 0.41 | 0.53 | 0.51 | 0.94 | 1.35 |
| 1381840_at          | 0.98 | 1.05 | 0.99 | 1.20 | 1.20 | 1.39 | 1.24 | 1.03 |
| 1381528_at          | 0.91 | 1.05 | 0.94 | 0.81 | 0.86 | 0.82 | 0.75 | 0.92 |
| 1381469_a_at        | 0.99 | 0.90 | 0.99 | 1.19 | 1.18 | 1.36 | 1.28 | 1.23 |
| 1381409_at          | 1.15 | 1.24 | 1.34 | 1.62 | 1.17 | 1.26 | 0.76 | 0.68 |
| 1381157_at          | 0.84 | 0.73 | 0.66 | 0.77 | 0.77 | 0.84 | 0.94 | 1.12 |
| 1380611_at          | 0.72 | 0.93 | 0.69 | 0.57 | 0.57 | 0.65 | 0.73 | 1.13 |
| 1380598_at          | 1.28 | 1.25 | 1.00 | 1.07 | 0.90 | 0.84 | 0.80 | 0.94 |
| 1380306_at          | 0.36 | 0.46 | 0.56 | 0.50 | 0.54 | 0.67 | 0.95 | 1.38 |
| 1379971_at          | 1.03 | 0.73 | 0.97 | 0.99 | 1.10 | 1.40 | 1.31 | 1.28 |
| 1379716_at          | 0.68 | 0.84 | 0.66 | 0.80 | 0.53 | 0.62 | 0.78 | 1.00 |
| 1379477_at          | 0.87 | 0.81 | 0.93 | 0.76 | 0.60 | 0.71 | 0.78 | 1.11 |
| 1379467_at          | 1.10 | 0.59 | 0.74 | 0.59 | 0.68 | 0.64 | 0.74 | 0.99 |
| 1379369_at          | 1.02 | 0.86 | 0.87 | 0.72 | 0.78 | 0.94 | 0.87 | 0.99 |
| 1379051_at          | 0.80 | 0.83 | 0.96 | 0.72 | 0.63 | 0.73 | 0.98 | 1.01 |
| 1378745_at          | 0.20 | 0.26 | 0.22 | 0.60 | 1.07 | 1.89 | 2.20 | 3.04 |
| 1378156_at          | 0.95 | 0.73 | 0.80 | 0.64 | 0.69 | 0.66 | 0.99 | 0.94 |
| 1378105_at          | 0.84 | 0.83 | 0.81 | 0.76 | 0.79 | 0.93 | 0.99 | 1.24 |
| 1378043_at          | 2.00 | 2.01 | 3.76 | 2.81 | 3.50 | 2.57 | 1.57 | 1.01 |
| 1378038_at          | 1.02 | 1.13 | 1.10 | 1.25 | 1.37 | 1.36 | 1.22 | 1.24 |
| 1377982_at          | 1.11 | 1.28 | 1.09 | 1.53 | 1.28 | 0.99 | 0.78 | 0.83 |
| 1377772_at          | 0.63 | 0.61 | 0.52 | 0.93 | 0.75 | 1.71 | 1.30 | 1.34 |
| 1377635_at          | 1.03 | 0.52 | 0.49 | 0.47 | 0.60 | 0.70 | 0.99 | 1.18 |
| 1377608_a_at        | 1.07 | 1.01 | 1.04 | 0.85 | 0.83 | 0.96 | 0.80 | 0.87 |
| 1376947_at          | 1.04 | 1.11 | 0.84 | 0.78 | 0.72 | 0.86 | 0.87 | 0.98 |
| 1376858_at          | 1.39 | 1.30 | 0.94 | 0.94 | 1.03 | 0.80 | 0.85 | 0.81 |
| 1376465_at          | 0.75 | 0.80 | 0.76 | 0.91 | 0.84 | 1.07 | 1.09 | 1.21 |
| 1376440_at          | 0.91 | 0.87 | 0.94 | 0.87 | 0.79 | 1.01 | 0.92 | 0.98 |
| 1376177_at          | 0.73 | 0.77 | 0.77 | 0.81 | 0.66 | 0.88 | 1.06 | 1.26 |
| 1376071_at          | 1.14 | 1.23 | 1.05 | 1.36 | 1.19 | 1.05 | 0.93 | 0.88 |
| 1375908_at          | 1.12 | 1.23 | 1.38 | 1.61 | 1.12 | 1.34 | 0.99 | 0.84 |
| 1375760_at          | 0.73 | 0.62 | 0.75 | 0.91 | 0.82 | 1.02 | 0.95 | 1.25 |
| 1375692_at          | 0.91 | 0.93 | 0.95 | 0.86 | 0.92 | 1.10 | 0.99 | 1.02 |
| 1375355_at          | 0.88 | 0.87 | 1.41 | 1.15 | 1.54 | 1.07 | 1.52 | 1.20 |
| 1375209_at          | 0.88 | 0.87 | 0.83 | 0.89 | 0.84 | 1.05 | 1.18 | 1.33 |
| 1374855_at          | 0.67 | 0.58 | 0.60 | 0.28 | 0.36 | 0.70 | 2.29 | 3.81 |
| 1374706_at          | 0.96 | 0.92 | 0.84 | 0.90 | 0.83 | 0.95 | 0.90 | 0.91 |
| 1374681_at          | 1.11 | 1.29 | 1.17 | 1.63 | 1.33 | 1.02 | 0.91 | 0.76 |

Supplementary Table 2: Mean Normalized Intensities of Individual Probe Sets Mined for Circadian Oscillations.

| Time (Hr)           | 0.25 | 1    | 2    | 4    | 6    | 8    | 10   | 11   |
|---------------------|------|------|------|------|------|------|------|------|
| <b>Probe set ID</b> |      |      |      |      |      |      |      |      |
| 1374531_at          | 0.97 | 0.87 | 0.80 | 0.71 | 0.72 | 0.82 | 0.98 | 1.25 |
| 1374307_at          | 0.81 | 0.88 | 0.79 | 0.79 | 0.72 | 0.87 | 0.87 | 1.07 |
| 1374036_at          | 0.76 | 0.98 | 0.72 | 0.84 | 0.84 | 0.82 | 0.83 | 0.95 |
| 1373960_at          | 0.78 | 0.76 | 0.74 | 0.86 | 0.83 | 1.21 | 1.27 | 1.62 |
| 1373950_at          | 0.88 | 0.81 | 0.92 | 0.81 | 0.90 | 0.97 | 0.96 | 1.00 |
| 1373816_at          | 1.05 | 1.04 | 0.99 | 0.87 | 0.87 | 0.86 | 0.83 | 1.01 |
| 1373718_at          | 1.29 | 1.34 | 1.55 | 1.59 | 1.17 | 0.81 | 0.74 | 0.89 |
| 1373708_at          | 1.15 | 1.06 | 1.08 | 0.82 | 0.71 | 0.73 | 0.65 | 0.79 |
| 1373566_at          | 1.05 | 1.16 | 1.00 | 0.91 | 0.79 | 0.76 | 0.86 | 0.83 |
| 1373542_at          | 1.21 | 1.21 | 1.19 | 1.24 | 1.08 | 0.79 | 0.70 | 0.72 |
| 1373403_at          | 0.80 | 0.83 | 0.83 | 0.80 | 0.74 | 1.02 | 1.02 | 0.92 |
| 1373399_at          | 1.01 | 1.07 | 1.03 | 1.41 | 1.26 | 1.17 | 0.99 | 0.96 |
| 1373239_at          | 1.05 | 0.85 | 0.84 | 1.05 | 1.09 | 1.30 | 1.51 | 1.45 |
| 1373158_at          | 0.82 | 0.72 | 0.62 | 0.76 | 0.79 | 1.20 | 1.42 | 1.76 |
| 1373139_at          | 0.87 | 0.88 | 0.88 | 0.79 | 0.70 | 0.87 | 0.96 | 1.10 |
| 1373114_at          | 1.29 | 1.82 | 1.42 | 1.79 | 1.45 | 1.38 | 0.92 | 0.83 |
| 1373093_at          | 0.83 | 0.87 | 0.55 | 0.64 | 0.73 | 0.86 | 1.11 | 1.33 |
| 1372590_at          | 0.96 | 0.87 | 0.84 | 1.14 | 1.20 | 1.08 | 1.25 | 1.20 |
| 1372491_at          | 0.95 | 1.00 | 0.91 | 0.82 | 0.79 | 0.94 | 0.84 | 0.90 |
| 1372426_at          | 0.71 | 0.84 | 0.80 | 0.83 | 0.64 | 0.84 | 0.86 | 1.10 |
| 1372390_at          | 0.65 | 0.79 | 0.59 | 0.91 | 0.99 | 1.42 | 1.65 | 1.85 |
| 1372091_at          | 0.99 | 1.16 | 1.59 | 1.18 | 0.95 | 0.59 | 0.53 | 0.68 |
| 1372086_at          | 1.29 | 1.14 | 1.22 | 1.49 | 0.97 | 0.71 | 0.70 | 0.66 |
| 1371913_at          | 0.69 | 0.87 | 0.64 | 0.81 | 0.61 | 0.84 | 1.00 | 1.26 |
| 1371864_at          | 0.64 | 0.76 | 0.70 | 0.73 | 0.70 | 1.15 | 1.08 | 1.43 |
| 1371832_at          | 1.16 | 1.20 | 1.34 | 1.10 | 1.02 | 0.78 | 0.61 | 0.85 |
| 1371583_at          | 0.66 | 0.89 | 0.77 | 1.07 | 0.91 | 1.02 | 1.25 | 1.32 |
| 1371505_at          | 1.26 | 1.25 | 1.01 | 1.03 | 0.91 | 0.86 | 0.84 | 0.92 |
| 1371367_at          | 1.20 | 1.31 | 0.92 | 0.89 | 0.84 | 0.78 | 0.77 | 0.87 |
| 1371090_at          | 1.24 | 1.30 | 1.26 | 1.24 | 1.07 | 1.08 | 1.10 | 1.00 |
| 1370991_at          | 0.63 | 0.79 | 0.93 | 0.17 | 0.12 | 0.56 | 0.89 | 0.99 |
| 1370963_at          | 1.08 | 1.12 | 0.94 | 1.01 | 0.64 | 0.74 | 0.71 | 1.01 |
| 1370954_at          | 1.14 | 1.22 | 1.08 | 0.86 | 0.73 | 0.65 | 0.74 | 0.93 |
| 1370912_at          | 1.38 | 1.06 | 0.99 | 0.38 | 0.45 | 0.46 | 0.44 | 0.43 |
| 1370847_at          | 1.19 | 1.37 | 1.39 | 1.63 | 1.11 | 1.15 | 0.96 | 0.99 |
| 1370816_at          | 0.25 | 0.16 | 0.55 | 0.72 | 2.00 | 4.60 | 4.44 | 4.20 |
| 1370570_at          | 1.07 | 1.11 | 1.29 | 1.39 | 1.33 | 1.19 | 1.32 | 1.14 |
| 1370541_at          | 0.39 | 0.41 | 0.44 | 0.57 | 0.85 | 1.93 | 2.01 | 2.64 |
| 1370540_at          | 0.27 | 0.43 | 0.30 | 0.69 | 0.95 | 2.25 | 1.76 | 1.86 |
| 1370510_a_at        | 2.18 | 1.76 | 1.77 | 1.53 | 1.38 | 0.89 | 0.46 | 0.35 |
| 1370445_at          | 0.94 | 1.02 | 0.95 | 0.82 | 0.82 | 0.85 | 0.93 | 1.00 |
| 1370283_at          | 1.07 | 1.23 | 1.07 | 1.08 | 0.79 | 0.80 | 0.78 | 0.92 |

Supplementary Table 2: Mean Normalized Intensities of Individual Probe Sets Mined for Circadian Oscillations.

| <b>Time (Hr)</b>    | <b>0.25</b> | <b>1</b> | <b>2</b> | <b>4</b> | <b>6</b> | <b>8</b> | <b>10</b> | <b>11</b> |
|---------------------|-------------|----------|----------|----------|----------|----------|-----------|-----------|
| <b>Probe set ID</b> |             |          |          |          |          |          |           |           |
| <b>1370266_at</b>   | 1.05        | 1.18     | 1.62     | 1.53     | 1.62     | 1.36     | 1.33      | 1.01      |
| <b>1370209_at</b>   | 0.57        | 0.66     | 0.77     | 0.80     | 0.81     | 1.25     | 1.21      | 1.59      |
| <b>1369919_at</b>   | 0.03        | 0.46     | 0.87     | 0.74     | 1.33     | 1.55     | 1.91      | 1.78      |
| <b>1369433_at</b>   | 0.54        | 0.90     | 0.82     | 0.76     | 1.05     | 0.89     | 1.32      | 1.18      |
| <b>1368882_at</b>   | 1.37        | 1.15     | 1.33     | 1.41     | 1.20     | 1.32     | 1.08      | 0.93      |
| <b>1368862_at</b>   | 0.94        | 0.97     | 0.96     | 0.79     | 0.80     | 0.79     | 0.80      | 0.90      |
| <b>1368852_at</b>   | 1.29        | 1.42     | 1.12     | 0.87     | 0.70     | 0.81     | 0.86      | 0.91      |
| <b>1368681_at</b>   | 0.65        | 0.96     | 0.63     | 0.44     | 0.50     | 0.72     | 0.58      | 1.03      |
| <b>1368571_at</b>   | 1.09        | 1.51     | 1.39     | 1.59     | 1.20     | 0.92     | 0.85      | 0.89      |
| <b>1368527_at</b>   | 0.67        | 0.90     | 0.61     | 0.49     | 0.51     | 0.91     | 1.20      | 1.19      |
| <b>1368488_at</b>   | 1.50        | 1.53     | 2.06     | 1.22     | 1.06     | 0.59     | 0.32      | 0.47      |
| <b>1368486_at</b>   | 1.33        | 1.35     | 1.31     | 1.26     | 0.85     | 0.77     | 0.67      | 0.74      |
| <b>1368304_at</b>   | 0.77        | 0.78     | 0.57     | 0.48     | 0.56     | 0.83     | 1.05      | 1.26      |
| <b>1368303_at</b>   | 0.78        | 0.57     | 0.28     | 0.13     | 0.19     | 0.38     | 0.69      | 1.05      |
| <b>1368249_at</b>   | 0.73        | 0.57     | 0.68     | 0.59     | 0.54     | 1.21     | 1.02      | 1.56      |
| <b>1368200_at</b>   | 1.63        | 1.22     | 1.22     | 1.34     | 1.29     | 0.98     | 0.84      | 0.40      |
| <b>1368189_at</b>   | 1.67        | 1.38     | 1.60     | 1.61     | 1.24     | 0.84     | 0.78      | 0.90      |
| <b>1368177_at</b>   | 1.20        | 1.03     | 1.05     | 0.79     | 0.75     | 0.74     | 0.60      | 0.70      |
| <b>1367857_at</b>   | 1.29        | 1.10     | 1.02     | 1.09     | 1.06     | 0.70     | 0.72      | 0.94      |
| <b>1367850_at</b>   | 1.87        | 1.69     | 1.62     | 1.46     | 0.93     | 0.57     | 0.58      | 0.66      |
| <b>1367771_at</b>   | 0.90        | 0.84     | 0.86     | 0.48     | 0.53     | 0.61     | 0.56      | 0.82      |
| <b>1367568_a_at</b> | 0.90        | 0.86     | 0.74     | 0.78     | 0.72     | 0.69     | 0.69      | 0.96      |

Supplementary Table 2: Mean Normalized Intensities of Individual Probe Sets Mined for Circadian Oscillations.

| Time (Hr)           | 11.75 | 12.25 | 13   | 14   | 16   | 18   | 20   | 22   |
|---------------------|-------|-------|------|------|------|------|------|------|
| <b>Probe set ID</b> |       |       |      |      |      |      |      |      |
| 1398877_at          | 0.77  | 0.88  | 0.83 | 0.90 | 1.05 | 1.13 | 1.21 | 1.21 |
| 1398819_at          | 0.87  | 0.79  | 1.08 | 0.95 | 1.26 | 1.31 | 1.15 | 1.22 |
| 1398662_at          | 0.67  | 0.69  | 0.86 | 1.26 | 1.11 | 1.30 | 1.36 | 1.40 |
| 1398635_at          | 1.79  | 1.42  | 1.78 | 1.44 | 1.20 | 1.30 | 0.88 | 0.98 |
| 1398597_at          | 1.03  | 0.68  | 0.67 | 0.53 | 0.58 | 0.68 | 0.76 | 0.90 |
| 1398434_at          | 0.83  | 0.97  | 1.06 | 0.97 | 1.11 | 1.16 | 1.10 | 1.07 |
| 1398370_at          | 1.31  | 1.20  | 1.40 | 1.28 | 1.50 | 1.24 | 1.08 | 1.06 |
| 1398365_at          | 0.80  | 0.75  | 0.80 | 1.10 | 1.33 | 1.41 | 1.41 | 1.53 |
| 1398255_at          | 1.49  | 1.29  | 1.31 | 1.20 | 1.17 | 1.06 | 0.89 | 0.87 |
| 1398246_s_at        | 0.55  | 0.42  | 0.49 | 0.55 | 0.85 | 1.26 | 1.33 | 1.80 |
| 1397766_at          | 1.29  | 1.16  | 1.40 | 1.15 | 1.36 | 1.05 | 1.02 | 0.83 |
| 1397409_s_at        | 1.10  | 1.19  | 1.45 | 1.34 | 1.16 | 1.16 | 1.06 | 0.94 |
| 1397251_at          | 1.16  | 0.92  | 0.97 | 0.88 | 0.85 | 0.92 | 0.88 | 0.91 |
| 1397225_at          | 1.84  | 1.48  | 1.06 | 1.42 | 1.30 | 1.49 | 1.44 | 1.08 |
| 1396417_at          | 0.92  | 0.98  | 1.09 | 0.95 | 1.12 | 1.26 | 1.26 | 1.08 |
| 1396053_at          | 0.83  | 0.70  | 0.80 | 0.84 | 0.77 | 1.01 | 0.97 | 1.14 |
| 1395859_at          | 1.04  | 1.07  | 1.25 | 1.30 | 1.40 | 1.14 | 1.28 | 1.05 |
| 1395663_at          | 0.92  | 0.73  | 0.65 | 0.64 | 0.78 | 1.09 | 1.05 | 1.26 |
| 1395629_at          | 0.87  | 0.64  | 0.68 | 0.73 | 0.61 | 0.70 | 0.93 | 0.94 |
| 1395377_at          | 1.03  | 1.10  | 0.98 | 1.04 | 0.88 | 0.83 | 0.82 | 0.82 |
| 1394824_at          | 0.82  | 0.82  | 0.77 | 1.00 | 1.42 | 1.47 | 1.50 | 1.21 |
| 1393917_at          | 1.25  | 0.84  | 1.21 | 1.30 | 1.63 | 1.54 | 1.52 | 1.26 |
| 1393730_at          | 0.48  | 0.40  | 0.34 | 0.38 | 0.47 | 0.87 | 1.10 | 1.38 |
| 1393696_at          | 0.75  | 0.82  | 0.82 | 1.10 | 1.07 | 1.33 | 1.41 | 1.20 |
| 1393647_at          | 1.12  | 1.06  | 1.13 | 1.10 | 1.09 | 1.10 | 1.02 | 0.91 |
| 1393610_at          | 1.45  | 1.31  | 1.09 | 1.17 | 0.95 | 0.81 | 0.88 | 0.83 |
| 1393568_at          | 0.85  | 0.89  | 0.90 | 0.88 | 0.81 | 0.85 | 1.12 | 0.99 |
| 1393075_at          | 0.29  | 0.56  | 0.51 | 0.96 | 0.89 | 1.40 | 1.26 | 1.68 |
| 1392996_at          | 1.61  | 1.42  | 1.68 | 1.17 | 1.50 | 0.90 | 0.54 | 0.71 |
| 1392927_at          | 1.12  | 1.10  | 1.27 | 1.26 | 1.28 | 1.20 | 1.22 | 1.23 |
| 1392640_at          | 0.54  | 0.66  | 0.86 | 0.95 | 1.03 | 1.34 | 1.50 | 1.67 |
| 1392579_at          | 0.56  | 0.70  | 0.67 | 0.66 | 1.00 | 1.27 | 1.24 | 1.62 |
| 1392557_at          | 1.02  | 1.26  | 1.48 | 1.24 | 1.33 | 1.26 | 1.03 | 0.91 |
| 1392510_at          | 0.98  | 1.54  | 1.36 | 1.39 | 1.22 | 1.32 | 1.19 | 0.96 |
| 1392344_at          | 1.31  | 1.06  | 1.05 | 1.12 | 1.09 | 1.05 | 0.89 | 0.82 |
| 1392149_at          | 2.49  | 1.92  | 1.48 | 1.45 | 1.49 | 1.08 | 0.74 | 0.80 |
| 1391808_at          | 0.68  | 0.68  | 0.81 | 0.78 | 0.87 | 1.14 | 1.09 | 1.22 |
| 1391577_at          | 0.91  | 0.95  | 1.03 | 1.01 | 0.97 | 1.05 | 1.05 | 1.08 |
| 1391553_at          | 1.05  | 1.19  | 0.82 | 0.98 | 0.93 | 0.82 | 0.81 | 0.83 |
| 1391208_at          | 1.13  | 1.21  | 1.50 | 1.55 | 1.33 | 1.28 | 1.11 | 0.91 |
| 1391187_at          | 1.46  | 1.36  | 1.59 | 2.17 | 1.36 | 1.19 | 0.77 | 0.75 |
| 1390828_at          | 1.41  | 1.15  | 1.22 | 1.14 | 1.07 | 1.04 | 1.23 | 1.00 |



Supplementary Table 2: Mean Normalized Intensities of Individual Probe Sets Mined for Circadian Oscillations.

| Time (Hr)           | 11.75 | 12.25 | 13   | 14   | 16   | 18   | 20   | 22   |
|---------------------|-------|-------|------|------|------|------|------|------|
| <b>Probe set ID</b> |       |       |      |      |      |      |      |      |
| 1390819_at          | 1.76  | 1.93  | 1.46 | 1.83 | 1.41 | 1.22 | 0.93 | 0.83 |
| 1390628_at          | 0.70  | 0.78  | 0.66 | 0.70 | 0.72 | 1.06 | 1.18 | 1.32 |
| 1390430_at          | 2.05  | 2.75  | 1.99 | 2.10 | 1.48 | 0.89 | 0.69 | 0.37 |
| 1390010_at          | 1.13  | 0.97  | 1.14 | 1.03 | 1.12 | 1.18 | 1.04 | 1.02 |
| 1389911_at          | 1.82  | 1.37  | 1.37 | 1.24 | 1.12 | 1.02 | 0.79 | 0.93 |
| 1389844_at          | 0.76  | 1.00  | 0.87 | 0.96 | 1.10 | 1.12 | 1.21 | 1.18 |
| 1389456_at          | 0.83  | 0.77  | 0.71 | 0.68 | 0.68 | 0.94 | 1.00 | 1.18 |
| 1389284_at          | 0.79  | 0.58  | 0.53 | 0.49 | 0.56 | 0.91 | 0.96 | 1.23 |
| 1389199_at          | 0.59  | 0.72  | 0.93 | 0.75 | 0.94 | 1.12 | 1.13 | 1.19 |
| 1389020_at          | 0.91  | 0.93  | 0.99 | 1.06 | 1.20 | 1.24 | 1.37 | 1.34 |
| 1388949_at          | 1.37  | 1.13  | 1.27 | 1.16 | 1.16 | 1.15 | 0.98 | 0.87 |
| 1388945_at          | 1.22  | 1.07  | 1.29 | 1.10 | 1.39 | 1.15 | 1.05 | 1.01 |
| 1388901_at          | 1.69  | 1.26  | 1.70 | 1.47 | 1.90 | 1.46 | 1.44 | 0.94 |
| 1388898_at          | 0.54  | 0.83  | 0.80 | 0.80 | 0.98 | 1.23 | 1.19 | 1.20 |
| 1388674_at          | 0.86  | 0.84  | 0.60 | 1.00 | 0.85 | 0.99 | 1.36 | 1.35 |
| 1388525_at          | 1.38  | 1.46  | 1.08 | 1.26 | 1.20 | 1.07 | 1.02 | 0.79 |
| 1388064_a_at        | 1.28  | 0.91  | 0.93 | 0.75 | 0.78 | 0.73 | 0.76 | 0.88 |
| 1388002_at          | 0.93  | 0.86  | 0.93 | 0.84 | 0.60 | 0.68 | 0.62 | 0.79 |
| 1387874_at          | 4.53  | 4.10  | 3.35 | 3.02 | 2.55 | 0.95 | 0.65 | 0.44 |
| 1387631_at          | 0.71  | 0.56  | 0.66 | 0.73 | 0.71 | 1.02 | 1.12 | 1.22 |
| 1386833_at          | 0.92  | 0.84  | 0.76 | 0.76 | 0.73 | 0.82 | 0.90 | 0.94 |
| 1386832_a_at        | 0.98  | 0.88  | 0.88 | 0.82 | 0.63 | 0.89 | 0.62 | 0.97 |
| 1386641_at          | 1.07  | 1.34  | 1.26 | 1.55 | 1.67 | 1.37 | 1.15 | 0.85 |
| 1386566_at          | 0.99  | 0.90  | 0.99 | 0.90 | 0.89 | 0.78 | 0.72 | 0.83 |
| 1386097_at          | 1.34  | 0.90  | 1.19 | 1.09 | 0.99 | 0.62 | 0.71 | 0.91 |
| 1385973_at          | 2.89  | 2.33  | 2.73 | 2.52 | 3.96 | 3.01 | 1.61 | 0.35 |
| 1385904_at          | 1.33  | 1.26  | 1.03 | 1.00 | 0.83 | 0.83 | 0.93 | 0.86 |
| 1385585_at          | 1.17  | 1.32  | 1.19 | 1.41 | 1.28 | 1.29 | 1.20 | 0.97 |
| 1385382_at          | 0.69  | 0.43  | 0.72 | 0.66 | 0.80 | 0.62 | 0.84 | 0.95 |
| 1385374_at          | 1.33  | 1.22  | 1.46 | 1.04 | 1.29 | 1.38 | 0.99 | 1.06 |
| 1385229_at          | 1.21  | 1.66  | 1.33 | 1.21 | 1.13 | 1.05 | 0.98 | 0.85 |
| 1385149_at          | 0.93  | 0.92  | 1.07 | 0.92 | 1.14 | 1.20 | 1.22 | 1.25 |
| 1384386_at          | 1.09  | 1.00  | 0.89 | 0.79 | 0.79 | 0.88 | 0.73 | 0.88 |
| 1384209_at          | 1.33  | 1.25  | 1.13 | 1.30 | 1.45 | 1.18 | 0.83 | 0.84 |
| 1384110_at          | 1.50  | 1.12  | 1.19 | 1.33 | 1.42 | 1.47 | 1.10 | 0.99 |
| 1384106_at          | 1.03  | 1.10  | 1.14 | 1.11 | 1.25 | 1.05 | 1.20 | 1.00 |
| 1383610_at          | 1.37  | 1.22  | 1.18 | 1.22 | 1.46 | 1.29 | 0.93 | 0.94 |
| 1383533_at          | 1.14  | 1.16  | 1.18 | 1.04 | 1.01 | 0.98 | 1.02 | 0.95 |
| 1383518_at          | 0.72  | 0.83  | 0.61 | 0.59 | 0.36 | 0.69 | 0.99 | 1.21 |
| 1383439_at          | 0.42  | 0.37  | 0.32 | 0.08 | 0.15 | 0.24 | 0.45 | 1.08 |
| 1383263_at          | 0.98  | 1.03  | 1.01 | 0.85 | 0.79 | 0.65 | 0.70 | 0.79 |
| 1383004_at          | 0.82  | 0.91  | 1.04 | 0.91 | 0.64 | 0.72 | 0.66 | 0.89 |

Supplementary Table 2: Mean Normalized Intensities of Individual Probe Sets Mined for Circadian Oscillations.

| Time (Hr)           | 11.75 | 12.25 | 13   | 14   | 16   | 18   | 20   | 22   |
|---------------------|-------|-------|------|------|------|------|------|------|
| <b>Probe set ID</b> |       |       |      |      |      |      |      |      |
| 1382732_at          | 1.04  | 0.93  | 1.33 | 1.28 | 1.52 | 1.26 | 1.14 | 0.98 |
| 1382266_at          | 1.73  | 1.65  | 1.98 | 1.40 | 1.96 | 1.18 | 0.98 | 0.81 |
| 1382192_at          | 1.12  | 1.01  | 1.23 | 1.22 | 1.61 | 1.41 | 1.21 | 1.07 |
| 1382118_at          | 1.73  | 1.08  | 1.27 | 0.94 | 1.15 | 0.79 | 0.65 | 0.78 |
| 1382031_at          | 2.11  | 1.76  | 1.86 | 2.04 | 1.93 | 1.57 | 1.51 | 1.00 |
| 1381840_at          | 1.24  | 0.96  | 1.01 | 0.81 | 0.90 | 0.83 | 0.82 | 0.74 |
| 1381528_at          | 0.89  | 0.87  | 1.05 | 0.97 | 1.14 | 1.14 | 1.13 | 1.19 |
| 1381469_a_at        | 1.20  | 1.01  | 1.10 | 1.01 | 0.87 | 0.86 | 0.71 | 0.77 |
| 1381409_at          | 0.73  | 0.71  | 0.47 | 0.75 | 0.86 | 1.09 | 1.06 | 1.35 |
| 1381157_at          | 0.89  | 0.95  | 1.10 | 1.12 | 1.16 | 1.26 | 1.08 | 1.11 |
| 1380611_at          | 1.54  | 1.08  | 2.11 | 1.64 | 2.14 | 1.87 | 1.53 | 1.19 |
| 1380598_at          | 0.95  | 0.84  | 0.95 | 0.93 | 1.14 | 1.20 | 1.16 | 1.20 |
| 1380306_at          | 1.75  | 1.50  | 1.32 | 1.75 | 1.11 | 1.55 | 1.44 | 0.90 |
| 1379971_at          | 1.24  | 1.23  | 1.12 | 0.95 | 1.08 | 0.86 | 0.87 | 0.82 |
| 1379716_at          | 1.31  | 1.09  | 1.03 | 1.06 | 2.31 | 1.86 | 1.71 | 1.51 |
| 1379477_at          | 1.12  | 1.03  | 1.03 | 1.01 | 1.55 | 1.41 | 1.17 | 1.08 |
| 1379467_at          | 1.56  | 1.27  | 1.27 | 1.50 | 1.49 | 1.35 | 1.28 | 0.94 |
| 1379369_at          | 0.92  | 1.16  | 1.06 | 1.26 | 1.27 | 1.36 | 1.06 | 1.30 |
| 1379051_at          | 0.87  | 1.12  | 1.06 | 1.18 | 1.34 | 1.39 | 1.31 | 1.00 |
| 1378745_at          | 3.03  | 3.05  | 2.68 | 2.23 | 2.09 | 1.04 | 0.83 | 0.51 |
| 1378156_at          | 1.20  | 1.35  | 1.26 | 1.47 | 1.46 | 1.37 | 1.34 | 1.09 |
| 1378105_at          | 1.12  | 1.14  | 1.19 | 1.02 | 1.19 | 1.01 | 1.13 | 0.93 |
| 1378043_at          | 1.43  | 0.80  | 0.56 | 0.73 | 0.60 | 0.82 | 0.81 | 0.59 |
| 1378038_at          | 1.22  | 0.94  | 0.99 | 0.93 | 0.98 | 0.93 | 0.83 | 0.89 |
| 1377982_at          | 0.75  | 0.63  | 0.59 | 0.50 | 0.94 | 0.55 | 0.85 | 1.06 |
| 1377772_at          | 1.47  | 1.34  | 1.37 | 0.98 | 1.36 | 0.94 | 0.53 | 0.64 |
| 1377635_at          | 1.51  | 1.47  | 1.61 | 1.42 | 1.51 | 1.53 | 1.25 | 0.99 |
| 1377608_a_at        | 0.82  | 0.98  | 0.99 | 0.99 | 1.03 | 1.11 | 1.16 | 1.07 |
| 1376947_at          | 1.02  | 1.10  | 1.21 | 1.09 | 1.31 | 1.13 | 1.24 | 1.05 |
| 1376858_at          | 0.75  | 0.66  | 0.83 | 1.02 | 1.23 | 1.42 | 1.38 | 1.28 |
| 1376465_at          | 1.14  | 1.20  | 1.22 | 1.06 | 1.10 | 1.19 | 1.08 | 0.99 |
| 1376440_at          | 0.94  | 1.04  | 1.13 | 1.17 | 1.19 | 1.24 | 1.19 | 1.02 |
| 1376177_at          | 1.28  | 1.09  | 1.37 | 1.11 | 1.24 | 1.24 | 0.91 | 0.89 |
| 1376071_at          | 0.81  | 0.70  | 0.65 | 0.70 | 0.69 | 1.00 | 1.06 | 1.18 |
| 1375908_at          | 0.78  | 0.71  | 0.64 | 0.52 | 0.59 | 1.09 | 0.88 | 1.24 |
| 1375760_at          | 1.54  | 1.07  | 1.16 | 1.23 | 1.18 | 1.12 | 1.09 | 0.79 |
| 1375692_at          | 1.10  | 1.11  | 1.15 | 1.10 | 1.12 | 1.07 | 1.00 | 0.90 |
| 1375355_at          | 1.04  | 1.05  | 1.01 | 0.94 | 0.78 | 0.66 | 0.60 | 0.72 |
| 1375209_at          | 1.41  | 1.29  | 1.37 | 1.17 | 1.06 | 1.03 | 0.99 | 0.94 |
| 1374855_at          | 4.28  | 3.78  | 3.76 | 3.04 | 1.83 | 1.36 | 0.93 | 0.48 |
| 1374706_at          | 0.96  | 1.03  | 1.03 | 1.06 | 1.15 | 1.08 | 1.08 | 1.10 |
| 1374681_at          | 0.76  | 0.63  | 0.64 | 0.58 | 0.56 | 0.92 | 0.77 | 1.13 |

Supplementary Table 2: Mean Normalized Intensities of Individual Probe Sets Mined for Circadian Oscillations.

| Time (Hr)           | 11.75 | 12.25 | 13   | 14   | 16   | 18   | 20   | 22   |
|---------------------|-------|-------|------|------|------|------|------|------|
| <b>Probe set ID</b> |       |       |      |      |      |      |      |      |
| 1374531_at          | 1.36  | 1.05  | 1.37 | 1.17 | 1.64 | 1.35 | 1.06 | 0.93 |
| 1374307_at          | 1.07  | 0.99  | 1.07 | 1.02 | 1.26 | 1.28 | 1.15 | 1.05 |
| 1374036_at          | 1.01  | 0.94  | 1.17 | 1.15 | 1.16 | 1.20 | 1.21 | 1.01 |
| 1373960_at          | 1.73  | 1.51  | 1.50 | 1.02 | 1.29 | 1.11 | 0.80 | 0.85 |
| 1373950_at          | 1.09  | 1.19  | 1.09 | 1.13 | 1.26 | 1.23 | 1.29 | 0.86 |
| 1373816_at          | 0.96  | 0.87  | 1.05 | 1.02 | 1.04 | 1.10 | 1.08 | 1.07 |
| 1373718_at          | 0.91  | 0.70  | 0.84 | 0.79 | 0.79 | 0.92 | 0.98 | 1.23 |
| 1373708_at          | 0.82  | 0.75  | 0.95 | 0.91 | 1.29 | 1.88 | 1.38 | 1.68 |
| 1373566_at          | 0.89  | 0.81  | 1.07 | 0.81 | 1.14 | 1.08 | 1.19 | 1.14 |
| 1373542_at          | 0.73  | 0.57  | 0.65 | 0.67 | 0.80 | 1.05 | 1.14 | 1.14 |
| 1373403_at          | 1.09  | 1.04  | 1.07 | 1.03 | 1.41 | 1.37 | 1.39 | 1.07 |
| 1373399_at          | 1.00  | 0.87  | 1.05 | 0.79 | 0.73 | 0.85 | 0.77 | 0.99 |
| 1373239_at          | 1.54  | 1.21  | 1.19 | 0.93 | 0.95 | 0.96 | 0.79 | 0.77 |
| 1373158_at          | 2.17  | 1.66  | 1.69 | 1.18 | 1.80 | 1.23 | 0.96 | 0.84 |
| 1373139_at          | 1.17  | 1.14  | 1.30 | 1.06 | 1.24 | 1.05 | 0.89 | 0.92 |
| 1373114_at          | 0.75  | 0.71  | 0.68 | 0.55 | 0.52 | 0.73 | 0.70 | 1.20 |
| 1373093_at          | 1.67  | 1.46  | 1.61 | 1.44 | 1.19 | 1.06 | 1.07 | 0.99 |
| 1372590_at          | 1.51  | 1.19  | 1.17 | 1.25 | 1.05 | 0.78 | 0.79 | 0.92 |
| 1372491_at          | 0.92  | 1.01  | 1.05 | 1.01 | 1.02 | 1.16 | 1.16 | 1.21 |
| 1372426_at          | 1.14  | 1.01  | 0.93 | 1.14 | 1.26 | 1.29 | 1.23 | 1.10 |
| 1372390_at          | 1.85  | 1.58  | 1.44 | 1.06 | 1.23 | 0.80 | 0.60 | 0.84 |
| 1372091_at          | 0.70  | 0.68  | 0.72 | 0.68 | 1.05 | 1.39 | 1.59 | 1.42 |
| 1372086_at          | 0.85  | 0.55  | 0.67 | 0.83 | 0.87 | 1.05 | 1.34 | 1.20 |
| 1371913_at          | 1.21  | 1.13  | 1.28 | 1.30 | 1.29 | 1.16 | 1.13 | 1.03 |
| 1371864_at          | 1.79  | 1.60  | 1.34 | 1.40 | 1.15 | 1.02 | 1.12 | 0.86 |
| 1371832_at          | 0.76  | 0.66  | 0.78 | 0.85 | 0.84 | 1.00 | 1.10 | 1.14 |
| 1371583_at          | 1.40  | 1.15  | 1.42 | 1.25 | 1.26 | 1.06 | 0.98 | 0.85 |
| 1371505_at          | 0.91  | 0.82  | 0.96 | 0.94 | 1.11 | 1.16 | 1.07 | 1.19 |
| 1371367_at          | 0.83  | 0.86  | 1.08 | 0.98 | 1.08 | 1.25 | 1.20 | 1.21 |
| 1371090_at          | 0.75  | 0.98  | 0.93 | 0.84 | 0.69 | 0.61 | 0.65 | 0.93 |
| 1370991_at          | 1.16  | 1.09  | 1.64 | 1.13 | 1.85 | 1.79 | 1.79 | 1.21 |
| 1370963_at          | 0.86  | 0.89  | 0.96 | 1.20 | 1.43 | 1.32 | 1.21 | 1.34 |
| 1370954_at          | 0.82  | 0.79  | 0.83 | 0.77 | 1.40 | 1.37 | 1.33 | 1.25 |
| 1370912_at          | 0.48  | 0.61  | 0.68 | 1.23 | 1.56 | 1.99 | 1.33 | 1.38 |
| 1370847_at          | 0.68  | 0.74  | 0.52 | 0.56 | 0.54 | 0.73 | 0.97 | 1.42 |
| 1370816_at          | 4.21  | 3.33  | 2.31 | 1.61 | 1.02 | 0.31 | 0.22 | 0.24 |
| 1370570_at          | 1.04  | 0.87  | 0.84 | 0.70 | 0.67 | 0.70 | 0.80 | 0.79 |
| 1370541_at          | 2.04  | 2.95  | 2.38 | 2.48 | 1.66 | 1.02 | 0.69 | 0.40 |
| 1370540_at          | 1.65  | 2.25  | 2.47 | 2.27 | 0.50 | 0.64 | 1.02 | 0.14 |
| 1370510_a_at        | 0.26  | 0.34  | 0.27 | 0.37 | 0.34 | 0.73 | 1.13 | 1.31 |
| 1370445_at          | 0.96  | 1.01  | 1.02 | 1.15 | 1.13 | 1.22 | 1.09 | 1.09 |
| 1370283_at          | 0.88  | 0.84  | 0.95 | 0.97 | 1.00 | 1.02 | 1.02 | 1.14 |

Supplementary Table 2: Mean Normalized Intensities of Individual Probe Sets Mined for Circadian Oscillations.

| <b>Time (Hr)</b>    | <b>11.75</b> | <b>12.25</b> | <b>13</b> | <b>14</b> | <b>16</b> | <b>18</b> | <b>20</b> | <b>22</b> |
|---------------------|--------------|--------------|-----------|-----------|-----------|-----------|-----------|-----------|
| <b>Probe set ID</b> |              |              |           |           |           |           |           |           |
| 1370266_at          | 1.05         | 0.89         | 0.83      | 0.75      | 0.77      | 0.72      | 0.84      | 0.98      |
| 1370209_at          | 1.65         | 1.63         | 1.33      | 1.41      | 1.07      | 1.07      | 1.10      | 0.80      |
| 1369919_at          | 1.98         | 1.85         | 1.51      | 1.08      | 1.38      | 0.44      | 0.45      | 0.59      |
| 1369433_at          | 1.09         | 1.15         | 1.14      | 1.10      | 0.97      | 0.59      | 0.34      | 0.59      |
| 1368882_at          | 1.07         | 0.81         | 0.88      | 0.76      | 0.70      | 0.70      | 0.88      | 1.01      |
| 1368862_at          | 0.92         | 1.02         | 1.07      | 1.19      | 1.17      | 1.07      | 1.23      | 1.07      |
| 1368852_at          | 0.84         | 0.80         | 1.00      | 0.90      | 1.34      | 1.32      | 1.10      | 1.30      |
| 1368681_at          | 0.85         | 0.95         | 1.42      | 1.58      | 1.61      | 1.31      | 1.09      | 1.10      |
| 1368571_at          | 0.81         | 0.77         | 0.67      | 0.63      | 0.65      | 0.82      | 1.09      | 1.15      |
| 1368527_at          | 1.40         | 1.66         | 2.07      | 1.59      | 1.50      | 1.15      | 0.76      | 0.88      |
| 1368488_at          | 0.54         | 0.59         | 0.43      | 0.75      | 0.75      | 1.06      | 1.73      | 1.75      |
| 1368486_at          | 0.79         | 0.68         | 0.67      | 0.51      | 1.13      | 1.20      | 1.09      | 1.45      |
| 1368304_at          | 1.48         | 1.40         | 1.46      | 1.33      | 1.28      | 1.22      | 1.04      | 1.06      |
| 1368303_at          | 1.24         | 1.44         | 1.82      | 1.85      | 1.90      | 1.45      | 1.26      | 1.08      |
| 1368249_at          | 1.49         | 1.30         | 1.16      | 1.32      | 1.40      | 1.12      | 0.81      | 0.81      |
| 1368200_at          | 0.60         | 0.63         | 0.74      | 0.76      | 0.73      | 0.97      | 0.88      | 1.38      |
| 1368189_at          | 0.94         | 0.82         | 0.85      | 0.65      | 0.64      | 0.79      | 0.82      | 1.01      |
| 1368177_at          | 0.57         | 0.94         | 0.80      | 1.14      | 1.05      | 1.44      | 1.35      | 1.20      |
| 1367857_at          | 0.91         | 0.66         | 0.86      | 0.75      | 0.97      | 0.99      | 1.26      | 1.23      |
| 1367850_at          | 0.42         | 0.34         | 0.41      | 0.47      | 0.80      | 1.01      | 1.30      | 1.65      |
| 1367771_at          | 0.88         | 0.99         | 1.08      | 1.24      | 1.32      | 1.26      | 1.39      | 1.14      |
| 1367568_a_at        | 1.07         | 0.99         | 1.20      | 1.26      | 1.08      | 1.18      | 1.39      | 1.20      |

Supplementary Table 2: Mean Normalized Intensities of Individual Probe Sets Mined for Circadian Oscillations.

| Time (Hr)           | 23   | 23.75 | 24.25 | 25   | 26   | 28   | 30   | 32   |
|---------------------|------|-------|-------|------|------|------|------|------|
| <b>Probe set ID</b> |      |       |       |      |      |      |      |      |
| 1398877_at          | 1.37 | 1.39  | 1.22  | 1.22 | 1.22 | 0.91 | 0.88 | 0.82 |
| 1398819_at          | 1.37 | 1.28  | 1.33  | 1.22 | 0.94 | 0.76 | 0.68 | 0.71 |
| 1398662_at          | 1.61 | 1.49  | 1.24  | 1.23 | 1.05 | 0.97 | 0.89 | 0.86 |
| 1398635_at          | 0.83 | 0.92  | 1.00  | 0.87 | 0.68 | 0.79 | 0.71 | 0.97 |
| 1398597_at          | 1.15 | 1.19  | 0.96  | 1.25 | 1.43 | 1.95 | 1.42 | 1.39 |
| 1398434_at          | 1.11 | 1.09  | 0.98  | 0.96 | 0.68 | 0.87 | 0.70 | 0.69 |
| 1398370_at          | 0.91 | 0.80  | 0.69  | 0.91 | 0.78 | 0.67 | 0.67 | 0.78 |
| 1398365_at          | 1.56 | 1.35  | 1.14  | 1.21 | 1.10 | 0.91 | 0.58 | 0.83 |
| 1398255_at          | 0.80 | 0.75  | 0.69  | 0.63 | 0.57 | 0.91 | 0.75 | 0.92 |
| 1398246_s_at        | 2.00 | 1.90  | 1.94  | 2.02 | 1.69 | 1.74 | 0.99 | 0.60 |
| 1397766_at          | 0.77 | 0.75  | 0.90  | 0.87 | 0.80 | 0.81 | 0.64 | 0.98 |
| 1397409_s_at        | 0.86 | 0.86  | 0.97  | 0.91 | 0.61 | 0.61 | 0.39 | 0.57 |
| 1397251_at          | 0.76 | 0.92  | 0.99  | 0.93 | 1.08 | 1.16 | 1.30 | 1.21 |
| 1397225_at          | 0.81 | 0.52  | 0.48  | 0.61 | 0.71 | 0.52 | 0.59 | 0.91 |
| 1396417_at          | 1.06 | 1.17  | 0.98  | 1.03 | 0.86 | 0.64 | 0.80 | 0.77 |
| 1396053_at          | 1.02 | 1.08  | 1.15  | 1.34 | 1.31 | 1.34 | 0.93 | 0.81 |
| 1395859_at          | 1.11 | 0.86  | 1.09  | 1.05 | 0.63 | 0.71 | 0.58 | 0.73 |
| 1395663_at          | 1.19 | 1.20  | 1.14  | 1.16 | 1.18 | 1.34 | 1.02 | 1.03 |
| 1395629_at          | 1.00 | 1.23  | 1.18  | 1.43 | 1.77 | 1.96 | 1.59 | 1.33 |
| 1395377_at          | 0.79 | 0.84  | 1.05  | 0.79 | 1.08 | 1.18 | 1.21 | 1.35 |
| 1394824_at          | 1.36 | 1.18  | 1.05  | 1.03 | 1.04 | 0.95 | 0.80 | 0.82 |
| 1393917_at          | 1.24 | 0.94  | 0.79  | 0.89 | 0.57 | 0.80 | 0.48 | 0.53 |
| 1393730_at          | 1.68 | 1.56  | 1.28  | 1.32 | 1.26 | 1.39 | 1.21 | 0.95 |
| 1393696_at          | 1.31 | 1.26  | 1.37  | 1.18 | 0.99 | 0.87 | 0.84 | 0.90 |
| 1393647_at          | 1.04 | 0.96  | 0.85  | 0.88 | 0.87 | 0.93 | 0.92 | 0.93 |
| 1393610_at          | 0.85 | 0.90  | 0.85  | 0.93 | 0.87 | 1.11 | 1.11 | 1.12 |
| 1393568_at          | 1.14 | 1.13  | 1.19  | 1.09 | 1.25 | 0.98 | 1.11 | 0.95 |
| 1393075_at          | 1.39 | 1.29  | 1.47  | 0.92 | 1.09 | 1.06 | 0.76 | 0.52 |
| 1392996_at          | 0.66 | 0.65  | 0.76  | 0.82 | 0.90 | 0.90 | 0.75 | 1.14 |
| 1392927_at          | 1.13 | 1.02  | 0.90  | 0.94 | 0.77 | 0.92 | 0.74 | 0.90 |
| 1392640_at          | 2.05 | 1.92  | 1.43  | 1.43 | 1.37 | 0.87 | 0.59 | 0.43 |
| 1392579_at          | 1.51 | 1.47  | 1.27  | 1.26 | 1.58 | 1.13 | 0.83 | 0.80 |
| 1392557_at          | 1.01 | 0.78  | 0.71  | 0.99 | 0.57 | 0.72 | 0.62 | 0.81 |
| 1392510_at          | 1.02 | 0.82  | 0.85  | 0.66 | 0.73 | 0.80 | 0.94 | 0.88 |
| 1392344_at          | 0.93 | 0.90  | 0.81  | 0.83 | 0.97 | 0.99 | 0.97 | 1.24 |
| 1392149_at          | 0.59 | 0.60  | 0.71  | 0.61 | 0.50 | 0.80 | 0.84 | 1.39 |
| 1391808_at          | 1.33 | 1.35  | 1.24  | 1.29 | 0.94 | 1.20 | 1.21 | 0.98 |
| 1391577_at          | 1.11 | 1.12  | 1.09  | 1.08 | 1.04 | 0.96 | 0.94 | 0.88 |
| 1391553_at          | 0.86 | 0.93  | 1.25  | 1.38 | 1.22 | 1.20 | 1.46 | 1.41 |
| 1391208_at          | 0.73 | 0.70  | 0.64  | 0.48 | 0.37 | 0.78 | 0.54 | 0.97 |
| 1391187_at          | 0.74 | 0.74  | 0.53  | 0.64 | 0.40 | 0.58 | 0.51 | 0.70 |
| 1390828_at          | 0.74 | 0.58  | 0.66  | 0.73 | 0.53 | 0.71 | 0.66 | 0.94 |

Supplementary Table 2: Mean Normalized Intensities of Individual Probe Sets Mined for Circadian Oscillations.

| Time (Hr)           | 23   | 23.75 | 24.25 | 25   | 26   | 28   | 30   | 32   |
|---------------------|------|-------|-------|------|------|------|------|------|
| <b>Probe set ID</b> |      |       |       |      |      |      |      |      |
| 1390819_at          | 0.72 | 0.75  | 0.69  | 0.54 | 0.62 | 0.52 | 0.63 | 1.04 |
| 1390628_at          | 1.44 | 1.42  | 1.14  | 1.21 | 1.82 | 1.27 | 1.10 | 0.97 |
| 1390430_at          | 0.34 | 0.33  | 0.26  | 0.34 | 0.41 | 0.55 | 0.95 | 2.02 |
| 1390010_at          | 1.00 | 0.97  | 0.97  | 0.93 | 0.80 | 0.82 | 0.86 | 0.95 |
| 1389911_at          | 0.89 | 0.85  | 0.75  | 0.78 | 0.72 | 0.94 | 0.88 | 1.22 |
| 1389844_at          | 1.28 | 1.37  | 1.15  | 1.16 | 1.03 | 0.87 | 0.72 | 0.87 |
| 1389456_at          | 1.13 | 1.31  | 1.29  | 1.10 | 1.17 | 1.15 | 1.07 | 1.15 |
| 1389284_at          | 1.53 | 1.92  | 0.97  | 1.59 | 1.36 | 1.89 | 1.20 | 1.26 |
| 1389199_at          | 1.50 | 1.27  | 1.63  | 1.46 | 0.99 | 1.12 | 1.04 | 0.89 |
| 1389020_at          | 1.42 | 1.24  | 0.84  | 0.88 | 0.84 | 0.93 | 0.66 | 0.72 |
| 1388949_at          | 0.80 | 0.84  | 0.64  | 0.97 | 0.75 | 0.88 | 0.80 | 0.99 |
| 1388945_at          | 1.02 | 1.04  | 0.98  | 0.96 | 0.81 | 0.82 | 0.77 | 0.93 |
| 1388901_at          | 0.98 | 0.74  | 0.65  | 0.79 | 0.77 | 0.64 | 0.64 | 0.72 |
| 1388898_at          | 1.47 | 1.41  | 1.39  | 1.48 | 1.25 | 0.78 | 0.65 | 0.64 |
| 1388674_at          | 1.16 | 1.21  | 1.34  | 1.09 | 1.21 | 1.20 | 1.00 | 0.83 |
| 1388525_at          | 0.82 | 0.73  | 0.52  | 0.69 | 0.70 | 0.61 | 0.75 | 1.32 |
| 1388064_a_at        | 0.85 | 0.90  | 0.90  | 1.10 | 1.23 | 1.25 | 1.27 | 1.42 |
| 1388002_at          | 0.86 | 1.08  | 1.18  | 1.05 | 1.34 | 1.38 | 1.48 | 1.46 |
| 1387874_at          | 0.43 | 0.35  | 0.31  | 0.28 | 0.27 | 0.27 | 0.56 | 1.79 |
| 1387631_at          | 1.33 | 1.10  | 1.18  | 1.52 | 1.12 | 1.09 | 1.07 | 1.02 |
| 1386833_at          | 0.90 | 1.01  | 1.18  | 1.20 | 1.04 | 1.46 | 1.18 | 1.09 |
| 1386832_a_at        | 0.89 | 1.07  | 1.18  | 1.11 | 1.05 | 1.46 | 1.24 | 1.20 |
| 1386641_at          | 0.86 | 0.83  | 0.52  | 0.53 | 0.97 | 0.54 | 0.65 | 0.89 |
| 1386566_at          | 0.80 | 0.95  | 1.06  | 1.19 | 1.03 | 1.16 | 1.08 | 1.14 |
| 1386097_at          | 0.76 | 0.67  | 0.83  | 0.91 | 0.93 | 1.12 | 1.15 | 1.28 |
| 1385973_at          | 0.53 | 0.43  | 0.32  | 0.21 | 0.18 | 0.08 | 0.17 | 0.11 |
| 1385904_at          | 0.78 | 0.64  | 0.77  | 0.72 | 0.91 | 1.18 | 1.26 | 1.31 |
| 1385585_at          | 0.91 | 0.96  | 0.51  | 0.64 | 0.80 | 0.47 | 0.55 | 0.84 |
| 1385382_at          | 1.23 | 1.04  | 1.15  | 1.61 | 1.52 | 2.08 | 2.21 | 1.72 |
| 1385374_at          | 0.87 | 0.89  | 0.74  | 0.79 | 0.75 | 0.61 | 0.66 | 0.98 |
| 1385229_at          | 0.79 | 0.73  | 0.59  | 0.46 | 0.46 | 0.89 | 0.54 | 1.10 |
| 1385149_at          | 1.31 | 1.10  | 1.11  | 0.89 | 0.92 | 0.75 | 0.74 | 0.94 |
| 1384386_at          | 0.84 | 0.79  | 0.97  | 0.99 | 0.92 | 1.45 | 1.59 | 1.61 |
| 1384209_at          | 0.41 | 0.70  | 0.86  | 0.57 | 0.49 | 0.59 | 0.87 | 0.73 |
| 1384110_at          | 0.79 | 0.91  | 0.73  | 0.83 | 0.61 | 0.63 | 0.51 | 1.10 |
| 1384106_at          | 0.94 | 0.95  | 0.95  | 0.92 | 0.85 | 0.78 | 0.77 | 0.98 |
| 1383610_at          | 1.03 | 0.94  | 0.79  | 0.93 | 0.60 | 0.76 | 0.78 | 0.89 |
| 1383533_at          | 0.88 | 0.98  | 0.86  | 0.90 | 0.89 | 0.93 | 0.96 | 1.20 |
| 1383518_at          | 1.29 | 1.50  | 1.27  | 1.36 | 1.45 | 1.30 | 1.08 | 1.01 |
| 1383439_at          | 1.30 | 1.76  | 2.45  | 1.58 | 2.12 | 2.06 | 2.04 | 1.20 |
| 1383263_at          | 0.94 | 0.97  | 0.72  | 0.96 | 1.10 | 1.21 | 1.21 | 1.16 |
| 1383004_at          | 0.73 | 0.98  | 1.15  | 1.08 | 1.14 | 1.20 | 1.31 | 1.12 |

Supplementary Table 2: Mean Normalized Intensities of Individual Probe Sets Mined for Circadian Oscillations.

| Time (Hr)           | 23   | 23.75 | 24.25 | 25   | 26   | 28   | 30   | 32   |
|---------------------|------|-------|-------|------|------|------|------|------|
| <b>Probe set ID</b> |      |       |       |      |      |      |      |      |
| 1382732_at          | 1.04 | 0.85  | 0.82  | 1.03 | 0.59 | 0.70 | 0.56 | 0.54 |
| 1382266_at          | 0.71 | 0.79  | 0.69  | 0.57 | 0.70 | 0.80 | 0.68 | 1.28 |
| 1382192_at          | 1.11 | 0.95  | 0.84  | 0.97 | 0.65 | 0.75 | 0.59 | 0.66 |
| 1382118_at          | 0.68 | 0.60  | 0.61  | 0.55 | 0.82 | 1.47 | 1.30 | 1.55 |
| 1382031_at          | 0.82 | 0.75  | 1.08  | 0.38 | 0.48 | 0.41 | 0.53 | 0.51 |
| 1381840_at          | 0.80 | 0.73  | 0.98  | 1.05 | 0.99 | 1.20 | 1.20 | 1.39 |
| 1381528_at          | 1.18 | 1.23  | 0.91  | 1.05 | 0.94 | 0.81 | 0.86 | 0.82 |
| 1381469_a_at        | 0.91 | 0.72  | 0.99  | 0.90 | 0.99 | 1.19 | 1.18 | 1.36 |
| 1381409_at          | 1.18 | 1.44  | 1.15  | 1.24 | 1.34 | 1.62 | 1.17 | 1.26 |
| 1381157_at          | 1.03 | 0.90  | 0.84  | 0.73 | 0.66 | 0.77 | 0.77 | 0.84 |
| 1380611_at          | 1.09 | 0.77  | 0.72  | 0.93 | 0.69 | 0.57 | 0.57 | 0.65 |
| 1380598_at          | 1.39 | 1.44  | 1.28  | 1.25 | 1.00 | 1.07 | 0.90 | 0.84 |
| 1380306_at          | 0.68 | 0.55  | 0.36  | 0.46 | 0.56 | 0.50 | 0.54 | 0.67 |
| 1379971_at          | 0.67 | 0.86  | 1.03  | 0.73 | 0.97 | 0.99 | 1.10 | 1.40 |
| 1379716_at          | 1.28 | 1.14  | 0.68  | 0.84 | 0.66 | 0.80 | 0.53 | 0.62 |
| 1379477_at          | 1.11 | 0.97  | 0.87  | 0.81 | 0.93 | 0.76 | 0.60 | 0.71 |
| 1379467_at          | 0.69 | 0.52  | 1.10  | 0.59 | 0.74 | 0.59 | 0.68 | 0.64 |
| 1379369_at          | 1.18 | 0.99  | 1.02  | 0.86 | 0.87 | 0.72 | 0.78 | 0.94 |
| 1379051_at          | 1.12 | 0.75  | 0.80  | 0.83 | 0.96 | 0.72 | 0.63 | 0.73 |
| 1378745_at          | 0.34 | 0.35  | 0.20  | 0.26 | 0.22 | 0.60 | 1.07 | 1.89 |
| 1378156_at          | 0.72 | 0.81  | 0.95  | 0.73 | 0.80 | 0.64 | 0.69 | 0.66 |
| 1378105_at          | 0.89 | 0.99  | 0.84  | 0.83 | 0.81 | 0.76 | 0.79 | 0.93 |
| 1378043_at          | 0.48 | 1.26  | 2.00  | 2.01 | 3.76 | 2.81 | 3.50 | 2.57 |
| 1378038_at          | 0.92 | 0.80  | 1.02  | 1.13 | 1.10 | 1.25 | 1.37 | 1.36 |
| 1377982_at          | 1.15 | 1.25  | 1.11  | 1.28 | 1.09 | 1.53 | 1.28 | 0.99 |
| 1377772_at          | 0.74 | 0.75  | 0.63  | 0.61 | 0.52 | 0.93 | 0.75 | 1.71 |
| 1377635_at          | 0.84 | 0.71  | 1.03  | 0.52 | 0.49 | 0.47 | 0.60 | 0.70 |
| 1377608_a_at        | 1.18 | 1.08  | 1.07  | 1.01 | 1.04 | 0.85 | 0.83 | 0.96 |
| 1376947_at          | 1.14 | 0.99  | 1.04  | 1.11 | 0.84 | 0.78 | 0.72 | 0.86 |
| 1376858_at          | 1.45 | 1.34  | 1.39  | 1.30 | 0.94 | 0.94 | 1.03 | 0.80 |
| 1376465_at          | 0.99 | 0.83  | 0.75  | 0.80 | 0.76 | 0.91 | 0.84 | 1.07 |
| 1376440_at          | 1.08 | 1.04  | 0.91  | 0.87 | 0.94 | 0.87 | 0.79 | 1.01 |
| 1376177_at          | 0.92 | 0.89  | 0.73  | 0.77 | 0.77 | 0.81 | 0.66 | 0.88 |
| 1376071_at          | 1.27 | 1.24  | 1.14  | 1.23 | 1.05 | 1.36 | 1.19 | 1.05 |
| 1375908_at          | 1.33 | 1.42  | 1.12  | 1.23 | 1.38 | 1.61 | 1.12 | 1.34 |
| 1375760_at          | 0.68 | 0.81  | 0.73  | 0.62 | 0.75 | 0.91 | 0.82 | 1.02 |
| 1375692_at          | 0.98 | 0.95  | 0.91  | 0.93 | 0.95 | 0.86 | 0.92 | 1.10 |
| 1375355_at          | 0.60 | 0.74  | 0.88  | 0.87 | 1.41 | 1.15 | 1.54 | 1.07 |
| 1375209_at          | 0.94 | 0.98  | 0.88  | 0.87 | 0.83 | 0.89 | 0.84 | 1.05 |
| 1374855_at          | 0.43 | 0.22  | 0.67  | 0.58 | 0.60 | 0.28 | 0.36 | 0.70 |
| 1374706_at          | 1.02 | 1.07  | 0.96  | 0.92 | 0.84 | 0.90 | 0.83 | 0.95 |
| 1374681_at          | 1.12 | 1.21  | 1.11  | 1.29 | 1.17 | 1.63 | 1.33 | 1.02 |

Supplementary Table 2: Mean Normalized Intensities of Individual Probe Sets Mined for Circadian Oscillations.

| Time (Hr)           | 23   | 23.75 | 24.25 | 25   | 26   | 28   | 30   | 32   |
|---------------------|------|-------|-------|------|------|------|------|------|
| <b>Probe set ID</b> |      |       |       |      |      |      |      |      |
| 1374531_at          | 0.99 | 0.82  | 0.97  | 0.87 | 0.80 | 0.71 | 0.72 | 0.82 |
| 1374307_at          | 1.23 | 0.97  | 0.81  | 0.88 | 0.79 | 0.79 | 0.72 | 0.87 |
| 1374036_at          | 1.07 | 0.94  | 0.76  | 0.98 | 0.72 | 0.84 | 0.84 | 0.82 |
| 1373960_at          | 0.92 | 0.83  | 0.78  | 0.76 | 0.74 | 0.86 | 0.83 | 1.21 |
| 1373950_at          | 0.93 | 1.00  | 0.88  | 0.81 | 0.92 | 0.81 | 0.90 | 0.97 |
| 1373816_at          | 1.05 | 1.13  | 1.05  | 1.04 | 0.99 | 0.87 | 0.87 | 0.86 |
| 1373718_at          | 1.34 | 1.33  | 1.29  | 1.34 | 1.55 | 1.59 | 1.17 | 0.81 |
| 1373708_at          | 1.55 | 1.52  | 1.15  | 1.06 | 1.08 | 0.82 | 0.71 | 0.73 |
| 1373566_at          | 1.28 | 1.09  | 1.05  | 1.16 | 1.00 | 0.91 | 0.79 | 0.76 |
| 1373542_at          | 1.41 | 1.29  | 1.21  | 1.21 | 1.19 | 1.24 | 1.08 | 0.79 |
| 1373403_at          | 1.09 | 1.06  | 0.80  | 0.83 | 0.83 | 0.80 | 0.74 | 1.02 |
| 1373399_at          | 1.08 | 1.10  | 1.01  | 1.07 | 1.03 | 1.41 | 1.26 | 1.17 |
| 1373239_at          | 0.80 | 0.88  | 1.05  | 0.85 | 0.84 | 1.05 | 1.09 | 1.30 |
| 1373158_at          | 0.80 | 0.74  | 0.82  | 0.72 | 0.62 | 0.76 | 0.79 | 1.20 |
| 1373139_at          | 0.94 | 0.85  | 0.87  | 0.88 | 0.88 | 0.79 | 0.70 | 0.87 |
| 1373114_at          | 1.38 | 1.33  | 1.29  | 1.82 | 1.42 | 1.79 | 1.45 | 1.38 |
| 1373093_at          | 1.01 | 0.84  | 0.83  | 0.87 | 0.55 | 0.64 | 0.73 | 0.86 |
| 1372590_at          | 0.85 | 0.73  | 0.96  | 0.87 | 0.84 | 1.14 | 1.20 | 1.08 |
| 1372491_at          | 1.16 | 1.07  | 0.95  | 1.00 | 0.91 | 0.82 | 0.79 | 0.94 |
| 1372426_at          | 1.09 | 1.12  | 0.71  | 0.84 | 0.80 | 0.83 | 0.64 | 0.84 |
| 1372390_at          | 0.80 | 0.66  | 0.65  | 0.79 | 0.59 | 0.91 | 0.99 | 1.42 |
| 1372091_at          | 1.68 | 1.49  | 0.99  | 1.16 | 1.59 | 1.18 | 0.95 | 0.59 |
| 1372086_at          | 1.03 | 1.34  | 1.29  | 1.14 | 1.22 | 1.49 | 0.97 | 0.71 |
| 1371913_at          | 1.04 | 0.88  | 0.69  | 0.87 | 0.64 | 0.81 | 0.61 | 0.84 |
| 1371864_at          | 0.89 | 0.80  | 0.64  | 0.76 | 0.70 | 0.73 | 0.70 | 1.15 |
| 1371832_at          | 1.39 | 1.42  | 1.16  | 1.20 | 1.34 | 1.10 | 1.02 | 0.78 |
| 1371583_at          | 0.86 | 0.78  | 0.66  | 0.89 | 0.77 | 1.07 | 0.91 | 1.02 |
| 1371505_at          | 1.25 | 1.23  | 1.26  | 1.25 | 1.01 | 1.03 | 0.91 | 0.86 |
| 1371367_at          | 1.37 | 1.22  | 1.20  | 1.31 | 0.92 | 0.89 | 0.84 | 0.78 |
| 1371090_at          | 0.84 | 0.91  | 1.24  | 1.30 | 1.26 | 1.24 | 1.07 | 1.08 |
| 1370991_at          | 1.33 | 0.98  | 0.63  | 0.79 | 0.93 | 0.17 | 0.12 | 0.56 |
| 1370963_at          | 1.27 | 1.06  | 1.08  | 1.12 | 0.94 | 1.01 | 0.64 | 0.74 |
| 1370954_at          | 1.54 | 1.34  | 1.14  | 1.22 | 1.08 | 0.86 | 0.73 | 0.65 |
| 1370912_at          | 1.27 | 1.20  | 1.38  | 1.06 | 0.99 | 0.38 | 0.45 | 0.46 |
| 1370847_at          | 2.04 | 1.48  | 1.19  | 1.37 | 1.39 | 1.63 | 1.11 | 1.15 |
| 1370816_at          | 0.17 | 0.14  | 0.25  | 0.16 | 0.55 | 0.72 | 2.00 | 4.60 |
| 1370570_at          | 0.81 | 0.78  | 1.07  | 1.11 | 1.29 | 1.39 | 1.33 | 1.19 |
| 1370541_at          | 0.35 | 0.41  | 0.39  | 0.41 | 0.44 | 0.57 | 0.85 | 1.93 |
| 1370540_at          | 0.72 | 0.24  | 0.27  | 0.43 | 0.30 | 0.69 | 0.95 | 2.25 |
| 1370510_a_at        | 1.83 | 1.91  | 2.18  | 1.76 | 1.77 | 1.53 | 1.38 | 0.89 |
| 1370445_at          | 1.03 | 1.03  | 0.94  | 1.02 | 0.95 | 0.82 | 0.82 | 0.85 |
| 1370283_at          | 1.22 | 1.26  | 1.07  | 1.23 | 1.07 | 1.08 | 0.79 | 0.80 |



Supplementary Table 2: Mean Normalized Intensities of Individual Probe Sets Mined for Circadian Oscillations.

| <b>Time (Hr)</b>    | <b>23</b> | <b>23.75</b> | <b>24.25</b> | <b>25</b> | <b>26</b> | <b>28</b> | <b>30</b> | <b>32</b> |
|---------------------|-----------|--------------|--------------|-----------|-----------|-----------|-----------|-----------|
| <b>Probe set ID</b> |           |              |              |           |           |           |           |           |
| 1370266_at          | 0.95      | 0.92         | 1.05         | 1.18      | 1.62      | 1.53      | 1.62      | 1.36      |
| 1370209_at          | 0.81      | 0.81         | 0.57         | 0.66      | 0.77      | 0.80      | 0.81      | 1.25      |
| 1369919_at          | 0.20      | 0.38         | 0.03         | 0.46      | 0.87      | 0.74      | 1.33      | 1.55      |
| 1369433_at          | 0.69      | 0.68         | 0.54         | 0.90      | 0.82      | 0.76      | 1.05      | 0.89      |
| 1368882_at          | 0.87      | 1.27         | 1.37         | 1.15      | 1.33      | 1.41      | 1.20      | 1.32      |
| 1368862_at          | 1.20      | 1.13         | 0.94         | 0.97      | 0.96      | 0.79      | 0.80      | 0.79      |
| 1368852_at          | 1.47      | 1.36         | 1.29         | 1.42      | 1.12      | 0.87      | 0.70      | 0.81      |
| 1368681_at          | 1.10      | 1.06         | 0.65         | 0.96      | 0.63      | 0.44      | 0.50      | 0.72      |
| 1368571_at          | 1.41      | 1.50         | 1.09         | 1.51      | 1.39      | 1.59      | 1.20      | 0.92      |
| 1368527_at          | 0.93      | 0.89         | 0.67         | 0.90      | 0.61      | 0.49      | 0.51      | 0.91      |
| 1368488_at          | 2.62      | 1.91         | 1.50         | 1.53      | 2.06      | 1.22      | 1.06      | 0.59      |
| 1368486_at          | 1.58      | 1.49         | 1.33         | 1.35      | 1.31      | 1.26      | 0.85      | 0.77      |
| 1368304_at          | 1.07      | 0.85         | 0.77         | 0.78      | 0.57      | 0.48      | 0.56      | 0.83      |
| 1368303_at          | 0.97      | 0.81         | 0.78         | 0.57      | 0.28      | 0.13      | 0.19      | 0.38      |
| 1368249_at          | 0.63      | 0.76         | 0.73         | 0.57      | 0.68      | 0.59      | 0.54      | 1.21      |
| 1368200_at          | 1.17      | 1.44         | 1.63         | 1.22      | 1.22      | 1.34      | 1.29      | 0.98      |
| 1368189_at          | 1.29      | 1.21         | 1.67         | 1.38      | 1.60      | 1.61      | 1.24      | 0.84      |
| 1368177_at          | 1.20      | 1.13         | 1.20         | 1.03      | 1.05      | 0.79      | 0.75      | 0.74      |
| 1367857_at          | 1.25      | 1.23         | 1.29         | 1.10      | 1.02      | 1.09      | 1.06      | 0.70      |
| 1367850_at          | 1.61      | 1.56         | 1.87         | 1.69      | 1.62      | 1.46      | 0.93      | 0.57      |
| 1367771_at          | 1.02      | 1.07         | 0.90         | 0.84      | 0.86      | 0.48      | 0.53      | 0.61      |
| 1367568_a_at        | 1.25      | 1.12         | 0.90         | 0.86      | 0.74      | 0.78      | 0.72      | 0.69      |

Supplementary Table 2: Mean Normalized Intensities of Individual Probe Sets Mined for Circadian Oscillations.

| <b>Time (Hr)</b>    | <b>34</b> | <b>35</b> | <b>35.75</b> | <b>36.25</b> | <b>37</b> | <b>38</b> | <b>40</b> | <b>42</b> |
|---------------------|-----------|-----------|--------------|--------------|-----------|-----------|-----------|-----------|
| <b>Probe set ID</b> |           |           |              |              |           |           |           |           |
| 1398877_at          | 0.69      | 0.88      | 0.77         | 0.88         | 0.83      | 0.90      | 1.05      | 1.13      |
| 1398819_at          | 0.79      | 0.93      | 0.87         | 0.79         | 1.08      | 0.95      | 1.26      | 1.31      |
| 1398662_at          | 0.85      | 0.64      | 0.67         | 0.69         | 0.86      | 1.26      | 1.11      | 1.30      |
| 1398635_at          | 1.34      | 1.31      | 1.79         | 1.42         | 1.78      | 1.44      | 1.20      | 1.30      |
| 1398597_at          | 1.07      | 0.90      | 1.03         | 0.68         | 0.67      | 0.53      | 0.58      | 0.68      |
| 1398434_at          | 0.71      | 0.79      | 0.83         | 0.97         | 1.06      | 0.97      | 1.11      | 1.16      |
| 1398370_at          | 0.89      | 1.20      | 1.31         | 1.20         | 1.40      | 1.28      | 1.50      | 1.24      |
| 1398365_at          | 0.61      | 0.89      | 0.80         | 0.75         | 0.80      | 1.10      | 1.33      | 1.41      |
| 1398255_at          | 1.15      | 1.48      | 1.49         | 1.29         | 1.31      | 1.20      | 1.17      | 1.06      |
| 1398246_s_at        | 0.61      | 0.68      | 0.55         | 0.42         | 0.49      | 0.55      | 0.85      | 1.26      |
| 1397766_at          | 1.15      | 1.18      | 1.29         | 1.16         | 1.40      | 1.15      | 1.36      | 1.05      |
| 1397409_s_at        | 0.80      | 1.15      | 1.10         | 1.19         | 1.45      | 1.34      | 1.16      | 1.16      |
| 1397251_at          | 1.15      | 1.20      | 1.16         | 0.92         | 0.97      | 0.88      | 0.85      | 0.92      |
| 1397225_at          | 0.92      | 1.46      | 1.84         | 1.48         | 1.06      | 1.42      | 1.30      | 1.49      |
| 1396417_at          | 0.85      | 0.84      | 0.92         | 0.98         | 1.09      | 0.95      | 1.12      | 1.26      |
| 1396053_at          | 0.91      | 0.86      | 0.83         | 0.70         | 0.80      | 0.84      | 0.77      | 1.01      |
| 1395859_at          | 0.87      | 1.01      | 1.04         | 1.07         | 1.25      | 1.30      | 1.40      | 1.14      |
| 1395663_at          | 0.94      | 0.90      | 0.92         | 0.73         | 0.65      | 0.64      | 0.78      | 1.09      |
| 1395629_at          | 1.09      | 0.70      | 0.87         | 0.64         | 0.68      | 0.73      | 0.61      | 0.70      |
| 1395377_at          | 1.13      | 1.20      | 1.03         | 1.10         | 0.98      | 1.04      | 0.88      | 0.83      |
| 1394824_at          | 0.69      | 0.86      | 0.82         | 0.82         | 0.77      | 1.00      | 1.42      | 1.47      |
| 1393917_at          | 0.73      | 0.98      | 1.25         | 0.84         | 1.21      | 1.30      | 1.63      | 1.54      |
| 1393730_at          | 0.75      | 0.54      | 0.48         | 0.40         | 0.34      | 0.38      | 0.47      | 0.87      |
| 1393696_at          | 0.77      | 0.87      | 0.75         | 0.82         | 0.82      | 1.10      | 1.07      | 1.33      |
| 1393647_at          | 0.95      | 1.09      | 1.12         | 1.06         | 1.13      | 1.10      | 1.09      | 1.10      |
| 1393610_at          | 1.26      | 1.16      | 1.45         | 1.31         | 1.09      | 1.17      | 0.95      | 0.81      |
| 1393568_at          | 0.86      | 0.90      | 0.85         | 0.89         | 0.90      | 0.88      | 0.81      | 0.85      |
| 1393075_at          | 0.50      | 0.28      | 0.29         | 0.56         | 0.51      | 0.96      | 0.89      | 1.40      |
| 1392996_at          | 1.28      | 1.59      | 1.61         | 1.42         | 1.68      | 1.17      | 1.50      | 0.90      |
| 1392927_at          | 0.92      | 0.91      | 1.12         | 1.10         | 1.27      | 1.26      | 1.28      | 1.20      |
| 1392640_at          | 0.45      | 0.50      | 0.54         | 0.66         | 0.86      | 0.95      | 1.03      | 1.34      |
| 1392579_at          | 0.61      | 0.61      | 0.56         | 0.70         | 0.67      | 0.66      | 1.00      | 1.27      |
| 1392557_at          | 0.89      | 1.07      | 1.02         | 1.26         | 1.48      | 1.24      | 1.33      | 1.26      |
| 1392510_at          | 1.16      | 1.13      | 0.98         | 1.54         | 1.36      | 1.39      | 1.22      | 1.32      |
| 1392344_at          | 1.30      | 1.33      | 1.31         | 1.06         | 1.05      | 1.12      | 1.09      | 1.05      |
| 1392149_at          | 1.70      | 2.32      | 2.49         | 1.92         | 1.48      | 1.45      | 1.49      | 1.08      |
| 1391808_at          | 0.98      | 0.86      | 0.68         | 0.68         | 0.81      | 0.78      | 0.87      | 1.14      |
| 1391577_at          | 0.82      | 0.94      | 0.91         | 0.95         | 1.03      | 1.01      | 0.97      | 1.05      |
| 1391553_at          | 1.37      | 1.20      | 1.05         | 1.19         | 0.82      | 0.98      | 0.93      | 0.82      |
| 1391208_at          | 1.17      | 0.89      | 1.13         | 1.21         | 1.50      | 1.55      | 1.33      | 1.28      |
| 1391187_at          | 1.21      | 1.64      | 1.46         | 1.36         | 1.59      | 2.17      | 1.36      | 1.19      |
| 1390828_at          | 0.93      | 1.37      | 1.41         | 1.15         | 1.22      | 1.14      | 1.07      | 1.04      |

Supplementary Table 2: Mean Normalized Intensities of Individual Probe Sets Mined for Circadian Oscillations.

| Time (Hr)           | 34   | 35   | 35.75 | 36.25 | 37   | 38   | 40   | 42   |
|---------------------|------|------|-------|-------|------|------|------|------|
| <b>Probe set ID</b> |      |      |       |       |      |      |      |      |
| 1390819_at          | 1.24 | 1.56 | 1.76  | 1.93  | 1.46 | 1.83 | 1.41 | 1.22 |
| 1390628_at          | 0.69 | 0.67 | 0.70  | 0.78  | 0.66 | 0.70 | 0.72 | 1.06 |
| 1390430_at          | 1.88 | 2.25 | 2.05  | 2.75  | 1.99 | 2.10 | 1.48 | 0.89 |
| 1390010_at          | 1.01 | 0.96 | 1.13  | 0.97  | 1.14 | 1.03 | 1.12 | 1.18 |
| 1389911_at          | 1.46 | 1.75 | 1.82  | 1.37  | 1.37 | 1.24 | 1.12 | 1.02 |
| 1389844_at          | 0.60 | 0.78 | 0.76  | 1.00  | 0.87 | 0.96 | 1.10 | 1.12 |
| 1389456_at          | 0.81 | 0.89 | 0.83  | 0.77  | 0.71 | 0.68 | 0.68 | 0.94 |
| 1389284_at          | 0.76 | 0.99 | 0.79  | 0.58  | 0.53 | 0.49 | 0.56 | 0.91 |
| 1389199_at          | 0.73 | 0.76 | 0.59  | 0.72  | 0.93 | 0.75 | 0.94 | 1.12 |
| 1389020_at          | 0.79 | 0.99 | 0.91  | 0.93  | 0.99 | 1.06 | 1.20 | 1.24 |
| 1388949_at          | 1.18 | 1.18 | 1.37  | 1.13  | 1.27 | 1.16 | 1.16 | 1.15 |
| 1388945_at          | 1.06 | 1.07 | 1.22  | 1.07  | 1.29 | 1.10 | 1.39 | 1.15 |
| 1388901_at          | 0.83 | 1.21 | 1.69  | 1.26  | 1.70 | 1.47 | 1.90 | 1.46 |
| 1388898_at          | 0.55 | 0.62 | 0.54  | 0.83  | 0.80 | 0.80 | 0.98 | 1.23 |
| 1388674_at          | 0.62 | 0.60 | 0.86  | 0.84  | 0.60 | 1.00 | 0.85 | 0.99 |
| 1388525_at          | 1.31 | 1.29 | 1.38  | 1.46  | 1.08 | 1.26 | 1.20 | 1.07 |
| 1388064_a_at        | 1.15 | 1.25 | 1.28  | 0.91  | 0.93 | 0.75 | 0.78 | 0.73 |
| 1388002_at          | 0.98 | 0.92 | 0.93  | 0.86  | 0.93 | 0.84 | 0.60 | 0.68 |
| 1387874_at          | 2.51 | 4.25 | 4.53  | 4.10  | 3.35 | 3.02 | 2.55 | 0.95 |
| 1387631_at          | 0.91 | 0.72 | 0.71  | 0.56  | 0.66 | 0.73 | 0.71 | 1.02 |
| 1386833_at          | 1.16 | 1.12 | 0.92  | 0.84  | 0.76 | 0.76 | 0.73 | 0.82 |
| 1386832_a_at        | 1.14 | 1.22 | 0.98  | 0.88  | 0.88 | 0.82 | 0.63 | 0.89 |
| 1386641_at          | 0.82 | 0.87 | 1.07  | 1.34  | 1.26 | 1.55 | 1.67 | 1.37 |
| 1386566_at          | 1.15 | 1.01 | 0.99  | 0.90  | 0.99 | 0.90 | 0.89 | 0.78 |
| 1386097_at          | 1.24 | 1.16 | 1.34  | 0.90  | 1.19 | 1.09 | 0.99 | 0.62 |
| 1385973_at          | 0.41 | 1.85 | 2.89  | 2.33  | 2.73 | 2.52 | 3.96 | 3.01 |
| 1385904_at          | 1.18 | 1.47 | 1.33  | 1.26  | 1.03 | 1.00 | 0.83 | 0.83 |
| 1385585_at          | 0.73 | 1.01 | 1.17  | 1.32  | 1.19 | 1.41 | 1.28 | 1.29 |
| 1385382_at          | 0.98 | 0.67 | 0.69  | 0.43  | 0.72 | 0.66 | 0.80 | 0.62 |
| 1385374_at          | 0.98 | 1.30 | 1.33  | 1.22  | 1.46 | 1.04 | 1.29 | 1.38 |
| 1385229_at          | 1.18 | 1.24 | 1.21  | 1.66  | 1.33 | 1.21 | 1.13 | 1.05 |
| 1385149_at          | 0.89 | 0.92 | 0.93  | 0.92  | 1.07 | 0.92 | 1.14 | 1.20 |
| 1384386_at          | 1.40 | 1.01 | 1.09  | 1.00  | 0.89 | 0.79 | 0.79 | 0.88 |
| 1384209_at          | 1.31 | 1.39 | 1.33  | 1.25  | 1.13 | 1.30 | 1.45 | 1.18 |
| 1384110_at          | 0.93 | 1.15 | 1.50  | 1.12  | 1.19 | 1.33 | 1.42 | 1.47 |
| 1384106_at          | 0.97 | 1.04 | 1.03  | 1.10  | 1.14 | 1.11 | 1.25 | 1.05 |
| 1383610_at          | 0.90 | 1.13 | 1.37  | 1.22  | 1.18 | 1.22 | 1.46 | 1.29 |
| 1383533_at          | 1.15 | 1.25 | 1.14  | 1.16  | 1.18 | 1.04 | 1.01 | 0.98 |
| 1383518_at          | 0.78 | 0.83 | 0.72  | 0.83  | 0.61 | 0.59 | 0.36 | 0.69 |
| 1383439_at          | 0.80 | 0.51 | 0.42  | 0.37  | 0.32 | 0.08 | 0.15 | 0.24 |
| 1383263_at          | 1.25 | 1.24 | 0.98  | 1.03  | 1.01 | 0.85 | 0.79 | 0.65 |
| 1383004_at          | 1.10 | 1.07 | 0.82  | 0.91  | 1.04 | 0.91 | 0.64 | 0.72 |

Supplementary Table 2: Mean Normalized Intensities of Individual Probe Sets Mined for Circadian Oscillations.

| Time (Hr)           | 34   | 35   | 35.75 | 36.25 | 37   | 38   | 40   | 42   |
|---------------------|------|------|-------|-------|------|------|------|------|
| <b>Probe set ID</b> |      |      |       |       |      |      |      |      |
| 1382732_at          | 0.75 | 1.15 | 1.04  | 0.93  | 1.33 | 1.28 | 1.52 | 1.26 |
| 1382266_at          | 1.40 | 1.72 | 1.73  | 1.65  | 1.98 | 1.40 | 1.96 | 1.18 |
| 1382192_at          | 0.80 | 1.16 | 1.12  | 1.01  | 1.23 | 1.22 | 1.61 | 1.41 |
| 1382118_at          | 1.69 | 1.53 | 1.73  | 1.08  | 1.27 | 0.94 | 1.15 | 0.79 |
| 1382031_at          | 0.94 | 1.35 | 2.11  | 1.76  | 1.86 | 2.04 | 1.93 | 1.57 |
| 1381840_at          | 1.24 | 1.03 | 1.24  | 0.96  | 1.01 | 0.81 | 0.90 | 0.83 |
| 1381528_at          | 0.75 | 0.92 | 0.89  | 0.87  | 1.05 | 0.97 | 1.14 | 1.14 |
| 1381469_a_at        | 1.28 | 1.23 | 1.20  | 1.01  | 1.10 | 1.01 | 0.87 | 0.86 |
| 1381409_at          | 0.76 | 0.68 | 0.73  | 0.71  | 0.47 | 0.75 | 0.86 | 1.09 |
| 1381157_at          | 0.94 | 1.12 | 0.89  | 0.95  | 1.10 | 1.12 | 1.16 | 1.26 |
| 1380611_at          | 0.73 | 1.13 | 1.54  | 1.08  | 2.11 | 1.64 | 2.14 | 1.87 |
| 1380598_at          | 0.80 | 0.94 | 0.95  | 0.84  | 0.95 | 0.93 | 1.14 | 1.20 |
| 1380306_at          | 0.95 | 1.38 | 1.75  | 1.50  | 1.32 | 1.75 | 1.11 | 1.55 |
| 1379971_at          | 1.31 | 1.28 | 1.24  | 1.23  | 1.12 | 0.95 | 1.08 | 0.86 |
| 1379716_at          | 0.78 | 1.00 | 1.31  | 1.09  | 1.03 | 1.06 | 2.31 | 1.86 |
| 1379477_at          | 0.78 | 1.11 | 1.12  | 1.03  | 1.03 | 1.01 | 1.55 | 1.41 |
| 1379467_at          | 0.74 | 0.99 | 1.56  | 1.27  | 1.27 | 1.50 | 1.49 | 1.35 |
| 1379369_at          | 0.87 | 0.99 | 0.92  | 1.16  | 1.06 | 1.26 | 1.27 | 1.36 |
| 1379051_at          | 0.98 | 1.01 | 0.87  | 1.12  | 1.06 | 1.18 | 1.34 | 1.39 |
| 1378745_at          | 2.20 | 3.04 | 3.03  | 3.05  | 2.68 | 2.23 | 2.09 | 1.04 |
| 1378156_at          | 0.99 | 0.94 | 1.20  | 1.35  | 1.26 | 1.47 | 1.46 | 1.37 |
| 1378105_at          | 0.99 | 1.24 | 1.12  | 1.14  | 1.19 | 1.02 | 1.19 | 1.01 |
| 1378043_at          | 1.57 | 1.01 | 1.43  | 0.80  | 0.56 | 0.73 | 0.60 | 0.82 |
| 1378038_at          | 1.22 | 1.24 | 1.22  | 0.94  | 0.99 | 0.93 | 0.98 | 0.93 |
| 1377982_at          | 0.78 | 0.83 | 0.75  | 0.63  | 0.59 | 0.50 | 0.94 | 0.55 |
| 1377772_at          | 1.30 | 1.34 | 1.47  | 1.34  | 1.37 | 0.98 | 1.36 | 0.94 |
| 1377635_at          | 0.99 | 1.18 | 1.51  | 1.47  | 1.61 | 1.42 | 1.51 | 1.53 |
| 1377608_a_at        | 0.80 | 0.87 | 0.82  | 0.98  | 0.99 | 0.99 | 1.03 | 1.11 |
| 1376947_at          | 0.87 | 0.98 | 1.02  | 1.10  | 1.21 | 1.09 | 1.31 | 1.13 |
| 1376858_at          | 0.85 | 0.81 | 0.75  | 0.66  | 0.83 | 1.02 | 1.23 | 1.42 |
| 1376465_at          | 1.09 | 1.21 | 1.14  | 1.20  | 1.22 | 1.06 | 1.10 | 1.19 |
| 1376440_at          | 0.92 | 0.98 | 0.94  | 1.04  | 1.13 | 1.17 | 1.19 | 1.24 |
| 1376177_at          | 1.06 | 1.26 | 1.28  | 1.09  | 1.37 | 1.11 | 1.24 | 1.24 |
| 1376071_at          | 0.93 | 0.88 | 0.81  | 0.70  | 0.65 | 0.70 | 0.69 | 1.00 |
| 1375908_at          | 0.99 | 0.84 | 0.78  | 0.71  | 0.64 | 0.52 | 0.59 | 1.09 |
| 1375760_at          | 0.95 | 1.25 | 1.54  | 1.07  | 1.16 | 1.23 | 1.18 | 1.12 |
| 1375692_at          | 0.99 | 1.02 | 1.10  | 1.11  | 1.15 | 1.10 | 1.12 | 1.07 |
| 1375355_at          | 1.52 | 1.20 | 1.04  | 1.05  | 1.01 | 0.94 | 0.78 | 0.66 |
| 1375209_at          | 1.18 | 1.33 | 1.41  | 1.29  | 1.37 | 1.17 | 1.06 | 1.03 |
| 1374855_at          | 2.29 | 3.81 | 4.28  | 3.78  | 3.76 | 3.04 | 1.83 | 1.36 |
| 1374706_at          | 0.90 | 0.91 | 0.96  | 1.03  | 1.03 | 1.06 | 1.15 | 1.08 |
| 1374681_at          | 0.91 | 0.76 | 0.76  | 0.63  | 0.64 | 0.58 | 0.56 | 0.92 |

Supplementary Table 2: Mean Normalized Intensities of Individual Probe Sets Mined for Circadian Oscillations.

| <b>Time (Hr)</b>    | <b>34</b> | <b>35</b> | <b>35.75</b> | <b>36.25</b> | <b>37</b> | <b>38</b> | <b>40</b> | <b>42</b> |
|---------------------|-----------|-----------|--------------|--------------|-----------|-----------|-----------|-----------|
| <b>Probe set ID</b> |           |           |              |              |           |           |           |           |
| <b>1374531_at</b>   | 0.98      | 1.25      | 1.36         | 1.05         | 1.37      | 1.17      | 1.64      | 1.35      |
| <b>1374307_at</b>   | 0.87      | 1.07      | 1.07         | 0.99         | 1.07      | 1.02      | 1.26      | 1.28      |
| <b>1374036_at</b>   | 0.83      | 0.95      | 1.01         | 0.94         | 1.17      | 1.15      | 1.16      | 1.20      |
| <b>1373960_at</b>   | 1.27      | 1.62      | 1.73         | 1.51         | 1.50      | 1.02      | 1.29      | 1.11      |
| <b>1373950_at</b>   | 0.96      | 1.00      | 1.09         | 1.19         | 1.09      | 1.13      | 1.26      | 1.23      |
| <b>1373816_at</b>   | 0.83      | 1.01      | 0.96         | 0.87         | 1.05      | 1.02      | 1.04      | 1.10      |
| <b>1373718_at</b>   | 0.74      | 0.89      | 0.91         | 0.70         | 0.84      | 0.79      | 0.79      | 0.92      |
| <b>1373708_at</b>   | 0.65      | 0.79      | 0.82         | 0.75         | 0.95      | 0.91      | 1.29      | 1.88      |
| <b>1373566_at</b>   | 0.86      | 0.83      | 0.89         | 0.81         | 1.07      | 0.81      | 1.14      | 1.08      |
| <b>1373542_at</b>   | 0.70      | 0.72      | 0.73         | 0.57         | 0.65      | 0.67      | 0.80      | 1.05      |
| <b>1373403_at</b>   | 1.02      | 0.92      | 1.09         | 1.04         | 1.07      | 1.03      | 1.41      | 1.37      |
| <b>1373399_at</b>   | 0.99      | 0.96      | 1.00         | 0.87         | 1.05      | 0.79      | 0.73      | 0.85      |
| <b>1373239_at</b>   | 1.51      | 1.45      | 1.54         | 1.21         | 1.19      | 0.93      | 0.95      | 0.96      |
| <b>1373158_at</b>   | 1.42      | 1.76      | 2.17         | 1.66         | 1.69      | 1.18      | 1.80      | 1.23      |
| <b>1373139_at</b>   | 0.96      | 1.10      | 1.17         | 1.14         | 1.30      | 1.06      | 1.24      | 1.05      |
| <b>1373114_at</b>   | 0.92      | 0.83      | 0.75         | 0.71         | 0.68      | 0.55      | 0.52      | 0.73      |
| <b>1373093_at</b>   | 1.11      | 1.33      | 1.67         | 1.46         | 1.61      | 1.44      | 1.19      | 1.06      |
| <b>1372590_at</b>   | 1.25      | 1.20      | 1.51         | 1.19         | 1.17      | 1.25      | 1.05      | 0.78      |
| <b>1372491_at</b>   | 0.84      | 0.90      | 0.92         | 1.01         | 1.05      | 1.01      | 1.02      | 1.16      |
| <b>1372426_at</b>   | 0.86      | 1.10      | 1.14         | 1.01         | 0.93      | 1.14      | 1.26      | 1.29      |
| <b>1372390_at</b>   | 1.65      | 1.85      | 1.85         | 1.58         | 1.44      | 1.06      | 1.23      | 0.80      |
| <b>1372091_at</b>   | 0.53      | 0.68      | 0.70         | 0.68         | 0.72      | 0.68      | 1.05      | 1.39      |
| <b>1372086_at</b>   | 0.70      | 0.66      | 0.85         | 0.55         | 0.67      | 0.83      | 0.87      | 1.05      |
| <b>1371913_at</b>   | 1.00      | 1.26      | 1.21         | 1.13         | 1.28      | 1.30      | 1.29      | 1.16      |
| <b>1371864_at</b>   | 1.08      | 1.43      | 1.79         | 1.60         | 1.34      | 1.40      | 1.15      | 1.02      |
| <b>1371832_at</b>   | 0.61      | 0.85      | 0.76         | 0.66         | 0.78      | 0.85      | 0.84      | 1.00      |
| <b>1371583_at</b>   | 1.25      | 1.32      | 1.40         | 1.15         | 1.42      | 1.25      | 1.26      | 1.06      |
| <b>1371505_at</b>   | 0.84      | 0.92      | 0.91         | 0.82         | 0.96      | 0.94      | 1.11      | 1.16      |
| <b>1371367_at</b>   | 0.77      | 0.87      | 0.83         | 0.86         | 1.08      | 0.98      | 1.08      | 1.25      |
| <b>1371090_at</b>   | 1.10      | 1.00      | 0.75         | 0.98         | 0.93      | 0.84      | 0.69      | 0.61      |
| <b>1370991_at</b>   | 0.89      | 0.99      | 1.16         | 1.09         | 1.64      | 1.13      | 1.85      | 1.79      |
| <b>1370963_at</b>   | 0.71      | 1.01      | 0.86         | 0.89         | 0.96      | 1.20      | 1.43      | 1.32      |
| <b>1370954_at</b>   | 0.74      | 0.93      | 0.82         | 0.79         | 0.83      | 0.77      | 1.40      | 1.37      |
| <b>1370912_at</b>   | 0.44      | 0.43      | 0.48         | 0.61         | 0.68      | 1.23      | 1.56      | 1.99      |
| <b>1370847_at</b>   | 0.96      | 0.99      | 0.68         | 0.74         | 0.52      | 0.56      | 0.54      | 0.73      |
| <b>1370816_at</b>   | 4.44      | 4.20      | 4.21         | 3.33         | 2.31      | 1.61      | 1.02      | 0.31      |
| <b>1370570_at</b>   | 1.32      | 1.14      | 1.04         | 0.87         | 0.84      | 0.70      | 0.67      | 0.70      |
| <b>1370541_at</b>   | 2.01      | 2.64      | 2.04         | 2.95         | 2.38      | 2.48      | 1.66      | 1.02      |
| <b>1370540_at</b>   | 1.76      | 1.86      | 1.65         | 2.25         | 2.47      | 2.27      | 0.50      | 0.64      |
| <b>1370510_a_at</b> | 0.46      | 0.35      | 0.26         | 0.34         | 0.27      | 0.37      | 0.34      | 0.73      |
| <b>1370445_at</b>   | 0.93      | 1.00      | 0.96         | 1.01         | 1.02      | 1.15      | 1.13      | 1.22      |
| <b>1370283_at</b>   | 0.78      | 0.92      | 0.88         | 0.84         | 0.95      | 0.97      | 1.00      | 1.02      |

Supplementary Table 2: Mean Normalized Intensities of Individual Probe Sets Mined for Circadian Oscillations.

| <b>Time (Hr)</b>    | <b>34</b> | <b>35</b> | <b>35.75</b> | <b>36.25</b> | <b>37</b> | <b>38</b> | <b>40</b> | <b>42</b> |
|---------------------|-----------|-----------|--------------|--------------|-----------|-----------|-----------|-----------|
| <b>Probe set ID</b> |           |           |              |              |           |           |           |           |
| <b>1370266_at</b>   | 1.33      | 1.01      | 1.05         | 0.89         | 0.83      | 0.75      | 0.77      | 0.72      |
| <b>1370209_at</b>   | 1.21      | 1.59      | 1.65         | 1.63         | 1.33      | 1.41      | 1.07      | 1.07      |
| <b>1369919_at</b>   | 1.91      | 1.78      | 1.98         | 1.85         | 1.51      | 1.08      | 1.38      | 0.44      |
| <b>1369433_at</b>   | 1.32      | 1.18      | 1.09         | 1.15         | 1.14      | 1.10      | 0.97      | 0.59      |
| <b>1368882_at</b>   | 1.08      | 0.93      | 1.07         | 0.81         | 0.88      | 0.76      | 0.70      | 0.70      |
| <b>1368862_at</b>   | 0.80      | 0.90      | 0.92         | 1.02         | 1.07      | 1.19      | 1.17      | 1.07      |
| <b>1368852_at</b>   | 0.86      | 0.91      | 0.84         | 0.80         | 1.00      | 0.90      | 1.34      | 1.32      |
| <b>1368681_at</b>   | 0.58      | 1.03      | 0.85         | 0.95         | 1.42      | 1.58      | 1.61      | 1.31      |
| <b>1368571_at</b>   | 0.85      | 0.89      | 0.81         | 0.77         | 0.67      | 0.63      | 0.65      | 0.82      |
| <b>1368527_at</b>   | 1.20      | 1.19      | 1.40         | 1.66         | 2.07      | 1.59      | 1.50      | 1.15      |
| <b>1368488_at</b>   | 0.32      | 0.47      | 0.54         | 0.59         | 0.43      | 0.75      | 0.75      | 1.06      |
| <b>1368486_at</b>   | 0.67      | 0.74      | 0.79         | 0.68         | 0.67      | 0.51      | 1.13      | 1.20      |
| <b>1368304_at</b>   | 1.05      | 1.26      | 1.48         | 1.40         | 1.46      | 1.33      | 1.28      | 1.22      |
| <b>1368303_at</b>   | 0.69      | 1.05      | 1.24         | 1.44         | 1.82      | 1.85      | 1.90      | 1.45      |
| <b>1368249_at</b>   | 1.02      | 1.56      | 1.49         | 1.30         | 1.16      | 1.32      | 1.40      | 1.12      |
| <b>1368200_at</b>   | 0.84      | 0.40      | 0.60         | 0.63         | 0.74      | 0.76      | 0.73      | 0.97      |
| <b>1368189_at</b>   | 0.78      | 0.90      | 0.94         | 0.82         | 0.85      | 0.65      | 0.64      | 0.79      |
| <b>1368177_at</b>   | 0.60      | 0.70      | 0.57         | 0.94         | 0.80      | 1.14      | 1.05      | 1.44      |
| <b>1367857_at</b>   | 0.72      | 0.94      | 0.91         | 0.66         | 0.86      | 0.75      | 0.97      | 0.99      |
| <b>1367850_at</b>   | 0.58      | 0.66      | 0.42         | 0.34         | 0.41      | 0.47      | 0.80      | 1.01      |
| <b>1367771_at</b>   | 0.56      | 0.82      | 0.88         | 0.99         | 1.08      | 1.24      | 1.32      | 1.26      |
| <b>1367568_a_at</b> | 0.69      | 0.96      | 1.07         | 0.99         | 1.20      | 1.26      | 1.08      | 1.18      |

Supplementary Table 2: Mean Normalized Intensities of Individual Probe Sets Mined for Circadian Oscillations.

| Time (Hr)           | 44   | 46   | 47   | 47.75 |
|---------------------|------|------|------|-------|
| <b>Probe set ID</b> |      |      |      |       |
| 1398877_at          | 1.21 | 1.21 | 1.37 | 1.39  |
| 1398819_at          | 1.15 | 1.22 | 1.37 | 1.28  |
| 1398662_at          | 1.36 | 1.40 | 1.61 | 1.49  |
| 1398635_at          | 0.88 | 0.98 | 0.83 | 0.92  |
| 1398597_at          | 0.76 | 0.90 | 1.15 | 1.19  |
| 1398434_at          | 1.10 | 1.07 | 1.11 | 1.09  |
| 1398370_at          | 1.08 | 1.06 | 0.91 | 0.80  |
| 1398365_at          | 1.41 | 1.53 | 1.56 | 1.35  |
| 1398255_at          | 0.89 | 0.87 | 0.80 | 0.75  |
| 1398246_s_at        | 1.33 | 1.80 | 2.00 | 1.90  |
| 1397766_at          | 1.02 | 0.83 | 0.77 | 0.75  |
| 1397409_s_at        | 1.06 | 0.94 | 0.86 | 0.86  |
| 1397251_at          | 0.88 | 0.91 | 0.76 | 0.92  |
| 1397225_at          | 1.44 | 1.08 | 0.81 | 0.52  |
| 1396417_at          | 1.26 | 1.08 | 1.06 | 1.17  |
| 1396053_at          | 0.97 | 1.14 | 1.02 | 1.08  |
| 1395859_at          | 1.28 | 1.05 | 1.11 | 0.86  |
| 1395663_at          | 1.05 | 1.26 | 1.19 | 1.20  |
| 1395629_at          | 0.93 | 0.94 | 1.00 | 1.23  |
| 1395377_at          | 0.82 | 0.82 | 0.79 | 0.84  |
| 1394824_at          | 1.50 | 1.21 | 1.36 | 1.18  |
| 1393917_at          | 1.52 | 1.26 | 1.24 | 0.94  |
| 1393730_at          | 1.10 | 1.38 | 1.68 | 1.56  |
| 1393696_at          | 1.41 | 1.20 | 1.31 | 1.26  |
| 1393647_at          | 1.02 | 0.91 | 1.04 | 0.96  |
| 1393610_at          | 0.88 | 0.83 | 0.85 | 0.90  |
| 1393568_at          | 1.12 | 0.99 | 1.14 | 1.13  |
| 1393075_at          | 1.26 | 1.68 | 1.39 | 1.29  |
| 1392996_at          | 0.54 | 0.71 | 0.66 | 0.65  |
| 1392927_at          | 1.22 | 1.23 | 1.13 | 1.02  |
| 1392640_at          | 1.50 | 1.67 | 2.05 | 1.92  |
| 1392579_at          | 1.24 | 1.62 | 1.51 | 1.47  |
| 1392557_at          | 1.03 | 0.91 | 1.01 | 0.78  |
| 1392510_at          | 1.19 | 0.96 | 1.02 | 0.82  |
| 1392344_at          | 0.89 | 0.82 | 0.93 | 0.90  |
| 1392149_at          | 0.74 | 0.80 | 0.59 | 0.60  |
| 1391808_at          | 1.09 | 1.22 | 1.33 | 1.35  |
| 1391577_at          | 1.05 | 1.08 | 1.11 | 1.12  |
| 1391553_at          | 0.81 | 0.83 | 0.86 | 0.93  |
| 1391208_at          | 1.11 | 0.91 | 0.73 | 0.70  |
| 1391187_at          | 0.77 | 0.75 | 0.74 | 0.74  |
| 1390828_at          | 1.23 | 1.00 | 0.74 | 0.58  |

Supplementary Table 2: Mean Normalized Intensities of Individual Probe Sets Mined for Circadian Oscillations.

| <b>Time (Hr)</b>    | <b>44</b> | <b>46</b> | <b>47</b> | <b>47.75</b> |
|---------------------|-----------|-----------|-----------|--------------|
| <b>Probe set ID</b> |           |           |           |              |
| 1390819_at          | 0.93      | 0.83      | 0.72      | 0.75         |
| 1390628_at          | 1.18      | 1.32      | 1.44      | 1.42         |
| 1390430_at          | 0.69      | 0.37      | 0.34      | 0.33         |
| 1390010_at          | 1.04      | 1.02      | 1.00      | 0.97         |
| 1389911_at          | 0.79      | 0.93      | 0.89      | 0.85         |
| 1389844_at          | 1.21      | 1.18      | 1.28      | 1.37         |
| 1389456_at          | 1.00      | 1.18      | 1.13      | 1.31         |
| 1389284_at          | 0.96      | 1.23      | 1.53      | 1.92         |
| 1389199_at          | 1.13      | 1.19      | 1.50      | 1.27         |
| 1389020_at          | 1.37      | 1.34      | 1.42      | 1.24         |
| 1388949_at          | 0.98      | 0.87      | 0.80      | 0.84         |
| 1388945_at          | 1.05      | 1.01      | 1.02      | 1.04         |
| 1388901_at          | 1.44      | 0.94      | 0.98      | 0.74         |
| 1388898_at          | 1.19      | 1.20      | 1.47      | 1.41         |
| 1388674_at          | 1.36      | 1.35      | 1.16      | 1.21         |
| 1388525_at          | 1.02      | 0.79      | 0.82      | 0.73         |
| 1388064_a_at        | 0.76      | 0.88      | 0.85      | 0.90         |
| 1388002_at          | 0.62      | 0.79      | 0.86      | 1.08         |
| 1387874_at          | 0.65      | 0.44      | 0.43      | 0.35         |
| 1387631_at          | 1.12      | 1.22      | 1.33      | 1.10         |
| 1386833_at          | 0.90      | 0.94      | 0.90      | 1.01         |
| 1386832_a_at        | 0.62      | 0.97      | 0.89      | 1.07         |
| 1386641_at          | 1.15      | 0.85      | 0.86      | 0.83         |
| 1386566_at          | 0.72      | 0.83      | 0.80      | 0.95         |
| 1386097_at          | 0.71      | 0.91      | 0.76      | 0.67         |
| 1385973_at          | 1.61      | 0.35      | 0.53      | 0.43         |
| 1385904_at          | 0.93      | 0.86      | 0.78      | 0.64         |
| 1385585_at          | 1.20      | 0.97      | 0.91      | 0.96         |
| 1385382_at          | 0.84      | 0.95      | 1.23      | 1.04         |
| 1385374_at          | 0.99      | 1.06      | 0.87      | 0.89         |
| 1385229_at          | 0.98      | 0.85      | 0.79      | 0.73         |
| 1385149_at          | 1.22      | 1.25      | 1.31      | 1.10         |
| 1384386_at          | 0.73      | 0.88      | 0.84      | 0.79         |
| 1384209_at          | 0.83      | 0.84      | 0.41      | 0.70         |
| 1384110_at          | 1.10      | 0.99      | 0.79      | 0.91         |
| 1384106_at          | 1.20      | 1.00      | 0.94      | 0.95         |
| 1383610_at          | 0.93      | 0.94      | 1.03      | 0.94         |
| 1383533_at          | 1.02      | 0.95      | 0.88      | 0.98         |
| 1383518_at          | 0.99      | 1.21      | 1.29      | 1.50         |
| 1383439_at          | 0.45      | 1.08      | 1.30      | 1.76         |
| 1383263_at          | 0.70      | 0.79      | 0.94      | 0.97         |
| 1383004_at          | 0.66      | 0.89      | 0.73      | 0.98         |



Supplementary Table 2: Mean Normalized Intensities of Individual Probe Sets Mined for Circadian Oscillations.

| Time (Hr)           | 44   | 46   | 47   | 47.75 |
|---------------------|------|------|------|-------|
| <b>Probe set ID</b> |      |      |      |       |
| 1382732_at          | 1.14 | 0.98 | 1.04 | 0.85  |
| 1382266_at          | 0.98 | 0.81 | 0.71 | 0.79  |
| 1382192_at          | 1.21 | 1.07 | 1.11 | 0.95  |
| 1382118_at          | 0.65 | 0.78 | 0.68 | 0.60  |
| 1382031_at          | 1.51 | 1.00 | 0.82 | 0.75  |
| 1381840_at          | 0.82 | 0.74 | 0.80 | 0.73  |
| 1381528_at          | 1.13 | 1.19 | 1.18 | 1.23  |
| 1381469_a_at        | 0.71 | 0.77 | 0.91 | 0.72  |
| 1381409_at          | 1.06 | 1.35 | 1.18 | 1.44  |
| 1381157_at          | 1.08 | 1.11 | 1.03 | 0.90  |
| 1380611_at          | 1.53 | 1.19 | 1.09 | 0.77  |
| 1380598_at          | 1.16 | 1.20 | 1.39 | 1.44  |
| 1380306_at          | 1.44 | 0.90 | 0.68 | 0.55  |
| 1379971_at          | 0.87 | 0.82 | 0.67 | 0.86  |
| 1379716_at          | 1.71 | 1.51 | 1.28 | 1.14  |
| 1379477_at          | 1.17 | 1.08 | 1.11 | 0.97  |
| 1379467_at          | 1.28 | 0.94 | 0.69 | 0.52  |
| 1379369_at          | 1.06 | 1.30 | 1.18 | 0.99  |
| 1379051_at          | 1.31 | 1.00 | 1.12 | 0.75  |
| 1378745_at          | 0.83 | 0.51 | 0.34 | 0.35  |
| 1378156_at          | 1.34 | 1.09 | 0.72 | 0.81  |
| 1378105_at          | 1.13 | 0.93 | 0.89 | 0.99  |
| 1378043_at          | 0.81 | 0.59 | 0.48 | 1.26  |
| 1378038_at          | 0.83 | 0.89 | 0.92 | 0.80  |
| 1377982_at          | 0.85 | 1.06 | 1.15 | 1.25  |
| 1377772_at          | 0.53 | 0.64 | 0.74 | 0.75  |
| 1377635_at          | 1.25 | 0.99 | 0.84 | 0.71  |
| 1377608_a_at        | 1.16 | 1.07 | 1.18 | 1.08  |
| 1376947_at          | 1.24 | 1.05 | 1.14 | 0.99  |
| 1376858_at          | 1.38 | 1.28 | 1.45 | 1.34  |
| 1376465_at          | 1.08 | 0.99 | 0.99 | 0.83  |
| 1376440_at          | 1.19 | 1.02 | 1.08 | 1.04  |
| 1376177_at          | 0.91 | 0.89 | 0.92 | 0.89  |
| 1376071_at          | 1.06 | 1.18 | 1.27 | 1.24  |
| 1375908_at          | 0.88 | 1.24 | 1.33 | 1.42  |
| 1375760_at          | 1.09 | 0.79 | 0.68 | 0.81  |
| 1375692_at          | 1.00 | 0.90 | 0.98 | 0.95  |
| 1375355_at          | 0.60 | 0.72 | 0.60 | 0.74  |
| 1375209_at          | 0.99 | 0.94 | 0.94 | 0.98  |
| 1374855_at          | 0.93 | 0.48 | 0.43 | 0.22  |
| 1374706_at          | 1.08 | 1.10 | 1.02 | 1.07  |
| 1374681_at          | 0.77 | 1.13 | 1.12 | 1.21  |

Supplementary Table 2: Mean Normalized Intensities of Individual Probe Sets Mined for Circadian Oscillations.

| <b>Time (Hr)</b>    | <b>44</b> | <b>46</b> | <b>47</b> | <b>47.75</b> |
|---------------------|-----------|-----------|-----------|--------------|
| <b>Probe set ID</b> |           |           |           |              |
| 1374531_at          | 1.06      | 0.93      | 0.99      | 0.82         |
| 1374307_at          | 1.15      | 1.05      | 1.23      | 0.97         |
| 1374036_at          | 1.21      | 1.01      | 1.07      | 0.94         |
| 1373960_at          | 0.80      | 0.85      | 0.92      | 0.83         |
| 1373950_at          | 1.29      | 0.86      | 0.93      | 1.00         |
| 1373816_at          | 1.08      | 1.07      | 1.05      | 1.13         |
| 1373718_at          | 0.98      | 1.23      | 1.34      | 1.33         |
| 1373708_at          | 1.38      | 1.68      | 1.55      | 1.52         |
| 1373566_at          | 1.19      | 1.14      | 1.28      | 1.09         |
| 1373542_at          | 1.14      | 1.14      | 1.41      | 1.29         |
| 1373403_at          | 1.39      | 1.07      | 1.09      | 1.06         |
| 1373399_at          | 0.77      | 0.99      | 1.08      | 1.10         |
| 1373239_at          | 0.79      | 0.77      | 0.80      | 0.88         |
| 1373158_at          | 0.96      | 0.84      | 0.80      | 0.74         |
| 1373139_at          | 0.89      | 0.92      | 0.94      | 0.85         |
| 1373114_at          | 0.70      | 1.20      | 1.38      | 1.33         |
| 1373093_at          | 1.07      | 0.99      | 1.01      | 0.84         |
| 1372590_at          | 0.79      | 0.92      | 0.85      | 0.73         |
| 1372491_at          | 1.16      | 1.21      | 1.16      | 1.07         |
| 1372426_at          | 1.23      | 1.10      | 1.09      | 1.12         |
| 1372390_at          | 0.60      | 0.84      | 0.80      | 0.66         |
| 1372091_at          | 1.59      | 1.42      | 1.68      | 1.49         |
| 1372086_at          | 1.34      | 1.20      | 1.03      | 1.34         |
| 1371913_at          | 1.13      | 1.03      | 1.04      | 0.88         |
| 1371864_at          | 1.12      | 0.86      | 0.89      | 0.80         |
| 1371832_at          | 1.10      | 1.14      | 1.39      | 1.42         |
| 1371583_at          | 0.98      | 0.85      | 0.86      | 0.78         |
| 1371505_at          | 1.07      | 1.19      | 1.25      | 1.23         |
| 1371367_at          | 1.20      | 1.21      | 1.37      | 1.22         |
| 1371090_at          | 0.65      | 0.93      | 0.84      | 0.91         |
| 1370991_at          | 1.79      | 1.21      | 1.33      | 0.98         |
| 1370963_at          | 1.21      | 1.34      | 1.27      | 1.06         |
| 1370954_at          | 1.33      | 1.25      | 1.54      | 1.34         |
| 1370912_at          | 1.33      | 1.38      | 1.27      | 1.20         |
| 1370847_at          | 0.97      | 1.42      | 2.04      | 1.48         |
| 1370816_at          | 0.22      | 0.24      | 0.17      | 0.14         |
| 1370570_at          | 0.80      | 0.79      | 0.81      | 0.78         |
| 1370541_at          | 0.69      | 0.40      | 0.35      | 0.41         |
| 1370540_at          | 1.02      | 0.14      | 0.72      | 0.24         |
| 1370510_a_at        | 1.13      | 1.31      | 1.83      | 1.91         |
| 1370445_at          | 1.09      | 1.09      | 1.03      | 1.03         |
| 1370283_at          | 1.02      | 1.14      | 1.22      | 1.26         |

Supplementary Table 2: Mean Normalized Intensities of Individual Probe Sets Mined for Circadian Oscillations.

| <b>Time (Hr)</b>    | <b>44</b> | <b>46</b> | <b>47</b> | <b>47.75</b> |
|---------------------|-----------|-----------|-----------|--------------|
| <b>Probe set ID</b> |           |           |           |              |
| 1370266_at          | 0.84      | 0.98      | 0.95      | 0.92         |
| 1370209_at          | 1.10      | 0.80      | 0.81      | 0.81         |
| 1369919_at          | 0.45      | 0.59      | 0.20      | 0.38         |
| 1369433_at          | 0.34      | 0.59      | 0.69      | 0.68         |
| 1368882_at          | 0.88      | 1.01      | 0.87      | 1.27         |
| 1368862_at          | 1.23      | 1.07      | 1.20      | 1.13         |
| 1368852_at          | 1.10      | 1.30      | 1.47      | 1.36         |
| 1368681_at          | 1.09      | 1.10      | 1.10      | 1.06         |
| 1368571_at          | 1.09      | 1.15      | 1.41      | 1.50         |
| 1368527_at          | 0.76      | 0.88      | 0.93      | 0.89         |
| 1368488_at          | 1.73      | 1.75      | 2.62      | 1.91         |
| 1368486_at          | 1.09      | 1.45      | 1.58      | 1.49         |
| 1368304_at          | 1.04      | 1.06      | 1.07      | 0.85         |
| 1368303_at          | 1.26      | 1.08      | 0.97      | 0.81         |
| 1368249_at          | 0.81      | 0.81      | 0.63      | 0.76         |
| 1368200_at          | 0.88      | 1.38      | 1.17      | 1.44         |
| 1368189_at          | 0.82      | 1.01      | 1.29      | 1.21         |
| 1368177_at          | 1.35      | 1.20      | 1.20      | 1.13         |
| 1367857_at          | 1.26      | 1.23      | 1.25      | 1.23         |
| 1367850_at          | 1.30      | 1.65      | 1.61      | 1.56         |
| 1367771_at          | 1.39      | 1.14      | 1.02      | 1.07         |
| 1367568_a_at        | 1.39      | 1.20      | 1.25      | 1.12         |

**Supplementary Table 4: Probe Sets Exhibiting A Non-sinusoidal Circadian Expression Pattern**

| <b>Probe set ID</b> | <b>Accession number</b> | <b>Gene Symbol</b> | <b>Gene name</b>                                               |
|---------------------|-------------------------|--------------------|----------------------------------------------------------------|
| 1391758_at          | BE109438                | Ablim1             | Actin-binding LIM protein 1 long isoform                       |
| 1369526_at          | NM_013084               | Acadsb             | Acyl-Coenzyme A dehydrogenase, short/branched chain            |
| 1373347_at          | BF419134                | Acbd3              | Acyl-Coenzyme A binding domain containing 3                    |
| 1390549_at          | AA859796                | Adipor2            | Adiponectin receptor 2                                         |
| 1375444_at          | BF409829                | Ap3d               | Adaptor-related protein complex 3, delta subunit               |
| 1381100_at          | BE108751                | Arhgef12           | Rho guanine nucleotide exchange factor (GEF) 12                |
| 1392738_at          | AI602954                | Bat2d1             | BAT2 domain containing 1                                       |
| 1394964_at          | BM389840                | Bat2d2             | BAT2 domain containing 2                                       |
| 1374283_at          | BF419505                | Bptf               | bromodomain PHD finger transcription factor                    |
| 1371173_a_at        | Y13591                  | Cast               | calpastatin                                                    |
| 1395105_at          | AW527267                | Cwf19l2            | CWF19-like 2                                                   |
| 1376524_at          | BG378747                | Dd25               | Hypothetical protein Dd25                                      |
| 1393615_at          | AI059603                | Depdc6             | DEP domain containing 6                                        |
| 1388101_at          | AF389425                | Dpysl3             | Dihydropyrimidinase-like 3                                     |
| 1394985_at          | BI294752                | Eea1               | Early endosome antigen 1                                       |
| 1379485_at          | BF389640                | Eif3s10            | Eukaryotic translation initiation factor 3, subunit 10 (theta) |
| 1382040_at          | AI234919                | Eprs               | Glutamyl-prolyl-tRNA synthetase                                |
| 1384890_at          | AA998678                | Ezh1               | Enhancer of zeste homolog 1                                    |
| 1395535_at          | BF548555                | Fam98a             | Family with sequence similarity 98, member A                   |
| 1392633_at          | AI045724                | Fbxo32             | F-box protein 32                                               |
| 1384182_at          | BE128738                | Fermt2             | Fermitin family homolog 2                                      |
| 1384728_at          | BE112826                | Foxn3              | Forkhead box N3                                                |
| 1394347_at          | BF568007                | Golga4             | Golgi autoantigen, golgin subfamily a, 4                       |
| 1392309_at          | BI300426                | Jam2               | Junctional adhesion molecule 2                                 |
| 1393324_at          | BF542552                | Jam2               | Junctional adhesion molecule 2                                 |
| 1379194_at          | BF407258                | Klhdc5             | Kelch domain containing 5                                      |
| 1384146_at          | AI236895                | Luc7l2             | LUC7-like 2                                                    |
| 1389986_at          | AI008409                | Malat1             | Metastasis associated lung adenocarcinoma transcript 1         |
| 1385091_at          | AW530801                | Med13              | Mediator complex subunit 13                                    |
| 1380144_at          | BE103512                | Mobk1a             | Mps One Binder kinase activator-like 1A                        |
| 1385209_at          | BE105313                | Myst3              | MYST histone acetyltransferase 3                               |
| 1393576_at          | AA963989                | Nfia               | Nuclear factor I/A                                             |
| 1380371_at          | BE117361                | NIPBL              | Nipped-B homolog, Delangin                                     |
| 1395100_at          | BI286690                | Pbrm1              | Similar to polybromo-1                                         |
| 1393692_at          | AA965160                | Pcf11              | PCF11, cleavage and polyadenylation factor subunit             |
| 1382103_at          | AI549036                | Pgm3               | phosphoglucomutase 3                                           |
| 1384792_at          | BE107114                | Prpf40a            | pre-mRNA processing factor 40 homolog A                        |
| 1383266_at          | AW144660                | Sfrp1              | Secreted frizzled-related protein 1                            |
| 1379822_at          | BI294801                | Sfrs18             | Splicing factor, arginine/serine-rich 18                       |
| 1373303_at          | BM383325                | Sfrs2ip            | Splicing factor, arginine/serine-rich 2, interacting protein   |

**Supplementary Table 3: Probe Sets Exhibiting A Non-sinusoidal Circadian Expression Pattern**

| <b>Probe set ID</b> | <b>Accession number</b> | <b>Gene Symbol</b> | <b>Gene name</b>                             |
|---------------------|-------------------------|--------------------|----------------------------------------------|
| 1390345_at          | BG375523                | Snrnp70            | Small nuclear ribonucleoprotein 70           |
| 1394436_at          | BF560163                | Spag9              | Sperm associated antigen 9                   |
| 1390706_at          | BF392456                | Spnb2              | Spectrin beta 2                              |
| 1369628_at          | BG672437                | Sv2b               | Synaptic vesicle glycoprotein 2b             |
| 1393491_at          | BF398496                | Tbl1x              | Similar to transducin (beta)-like 1 X-linked |
| 1390871_at          | BF286230                | Tcerg1             | Transcription elongation regulator 1         |
| 1397286_at          | AW435211                | Tcf4               | Transcription factor 4                       |
| 1376096_a_at        | BE108246                | Tcf4               | Transcription factor 4                       |
| 1383827_at          | AI059119                | Tlk1               | tousled-like kinase 1                        |
| 1382939_at          | BE118639                | Tpr                | translocated promoter region                 |
| 1394814_at          | BF398127                | Tpr                | translocated promoter region                 |
| 1385527_at          | AA955194                | Usp7               | ubiquitin specific protease 7                |
| 1394935_at          | AI175684                | Wasf2              | WAS protein family, member 2                 |
| 1385240_at          | AW523099                | Wdr33              | WD repeat domain 33                          |
| 1394849_at          | BF402012                | Zbtb20             | Zinc finger and BTB domain containing 20     |
| 1385087_at          | BF406606                | Zbtb20             | Zinc finger and BTB domain containing 20     |
| 1393795_at          | BG377397                | Zeb2               | Zinc finger E-box binding homeobox 2         |
| 1392441_at          | BF415891                | Zeb2               | Zinc finger E-box binding homeobox 2         |
| 1381829_at          | AI227744                | Zfp318             | Zinc finger protein 318                      |
| 1375622_at          | BF402692                | Zfyve20            | Zinc finger, FYVE domain containing 20       |
| 1397302_at          | BF543495                | Zmynd11            | Zinc finger, MYND domain containing 11       |
| 1396654_at          | BF403645                | EST                |                                              |
| 1395650_at          | BF543766                | EST                |                                              |
| 1394682_at          | BF290030                | EST                |                                              |
| 1384854_at          | AI072679                | EST                |                                              |
| 1381650_at          | BM389433                | EST                |                                              |
| 1380701_at          | BF400722                | EST                |                                              |
| 1375453_at          | BM392052                | EST                |                                              |
| 1385350_at          | BF398122                | EST                |                                              |
| 1378347_at          | AW252020                | EST                |                                              |
| 1379733_at          | BF396474                | EST                |                                              |
| 1380644_at          | AI178542                | EST                |                                              |
| 1382368_at          | AA943075                | EST                |                                              |
| 1377396_at          | BF413101                | EST                |                                              |
| 1393811_at          | BF397269                | EST                |                                              |
| 1380503_at          | BI290590                | EST                |                                              |

Supplementary Table 5: Mean Normalized Intensities of Individual Probe Sets Exhibiting Non-sinusoidal Circadian Expression.

| Time (Hr)           | 0.25 | 1    | 2    | 4    | 6    | 8    | 10   | 11   |
|---------------------|------|------|------|------|------|------|------|------|
| <b>Probe set ID</b> |      |      |      |      |      |      |      |      |
| 1384728_at          | 0.71 | 1.07 | 1.89 | 1.57 | 2.15 | 2.18 | 1.26 | 1.08 |
| 1384182_at          | 0.50 | 0.74 | 1.91 | 2.22 | 2.58 | 1.68 | 1.43 | 0.87 |
| 1393491_at          | 1.07 | 0.94 | 2.08 | 2.65 | 1.95 | 1.53 | 1.18 | 1.01 |
| 1379485_at          | 0.57 | 0.61 | 2.01 | 1.99 | 2.15 | 1.55 | 1.16 | 0.98 |
| 1380371_at          | 0.98 | 0.94 | 1.69 | 2.26 | 2.56 | 1.68 | 1.33 | 1.26 |
| 1383827_at          | 0.68 | 0.74 | 1.80 | 2.42 | 2.54 | 1.75 | 1.52 | 1.27 |
| 1379194_at          | 0.90 | 1.10 | 2.42 | 2.01 | 2.09 | 1.14 | 1.17 | 0.81 |
| 1382040_at          | 1.02 | 1.07 | 2.18 | 2.04 | 2.38 | 1.62 | 1.20 | 1.04 |
| 1395535_at          | 0.92 | 0.89 | 2.09 | 2.19 | 2.06 | 1.52 | 1.24 | 1.05 |
| 1394849_at          | 0.67 | 0.64 | 1.83 | 2.19 | 2.63 | 1.57 | 1.12 | 0.93 |
| 1394935_at          | 0.77 | 0.90 | 1.49 | 2.02 | 2.21 | 1.27 | 1.29 | 0.86 |
| 1375453_at          | 0.89 | 0.90 | 1.52 | 1.62 | 2.14 | 1.39 | 1.02 | 0.53 |
| 1373303_at          | 0.77 | 0.66 | 1.80 | 1.91 | 2.23 | 1.39 | 1.22 | 1.16 |
| 1397286_at          | 0.92 | 0.83 | 1.82 | 1.78 | 2.22 | 1.60 | 1.18 | 0.86 |
| 1373347_at          | 0.78 | 0.98 | 1.61 | 2.14 | 1.97 | 1.61 | 1.42 | 1.19 |
| 1393795_at          | 1.01 | 0.99 | 1.59 | 2.01 | 1.48 | 1.32 | 1.17 | 1.02 |
| 1380503_at          | 0.85 | 0.83 | 1.63 | 1.75 | 2.03 | 1.25 | 1.26 | 1.21 |
| 1390345_at          | 1.17 | 0.89 | 1.48 | 1.97 | 2.04 | 1.23 | 1.22 | 1.03 |
| 1390706_at          | 0.71 | 0.76 | 1.62 | 2.12 | 2.01 | 1.09 | 1.09 | 0.81 |
| 1369628_at          | 0.83 | 0.63 | 3.57 | 3.24 | 3.31 | 1.58 | 1.36 | 1.01 |
| 1384792_at          | 1.07 | 0.89 | 1.64 | 1.96 | 2.11 | 1.16 | 1.05 | 0.88 |
| 1384146_at          | 0.86 | 0.92 | 1.31 | 2.01 | 1.90 | 1.37 | 1.30 | 0.81 |
| 1385350_at          | 0.72 | 0.80 | 1.64 | 2.26 | 1.77 | 1.42 | 1.16 | 0.98 |
| 1392309_at          | 0.72 | 0.77 | 2.15 | 3.08 | 2.65 | 2.14 | 1.64 | 0.87 |
| 1394436_at          | 0.83 | 0.71 | 2.54 | 2.27 | 2.77 | 2.14 | 1.35 | 1.34 |
| 1382939_at          | 1.00 | 1.05 | 2.10 | 2.11 | 2.33 | 1.57 | 1.38 | 1.25 |
| 1385087_at          | 0.81 | 0.92 | 2.31 | 2.93 | 3.44 | 2.45 | 1.97 | 1.39 |
| 1389986_at          | 0.88 | 0.73 | 2.37 | 3.18 | 3.19 | 2.02 | 1.71 | 1.69 |
| 1384854_at          | 0.82 | 0.83 | 2.86 | 2.57 | 3.52 | 2.33 | 1.81 | 1.45 |
| 1390549_at          | 0.91 | 0.96 | 2.19 | 2.03 | 2.00 | 1.75 | 1.25 | 0.77 |
| 1395105_at          | 0.55 | 0.83 | 2.15 | 2.24 | 2.71 | 1.84 | 1.24 | 0.95 |
| 1393615_at          | 0.74 | 1.14 | 4.94 | 4.49 | 5.43 | 3.87 | 2.51 | 1.97 |
| 1378347_at          | 0.87 | 0.95 | 1.40 | 1.48 | 2.06 | 1.38 | 1.00 | 1.06 |
| 1384890_at          | 0.85 | 0.86 | 1.83 | 1.80 | 2.67 | 1.53 | 1.27 | 0.78 |
| 1379733_at          | 1.19 | 1.25 | 2.16 | 2.10 | 2.03 | 1.42 | 1.35 | 0.89 |
| 1380144_at          | 1.14 | 0.89 | 1.73 | 2.23 | 2.39 | 1.96 | 1.53 | 0.74 |
| 1379822_at          | 1.12 | 0.88 | 1.71 | 1.56 | 2.31 | 1.66 | 1.02 | 0.96 |
| 1381100_at          | 0.73 | 0.82 | 1.56 | 2.05 | 1.83 | 1.42 | 1.21 | 1.00 |
| 1383266_at          | 1.02 | 0.84 | 1.72 | 1.54 | 2.42 | 1.23 | 1.27 | 0.73 |
| 1371173_a_at        | 0.83 | 1.11 | 2.51 | 2.22 | 3.92 | 2.59 | 2.00 | 1.54 |

Supplementary Table 4: Mean Normalized Intensities of Individual Probe Sets Exhibiting Non-sinusoidal Circadian Expression.

| Time (Hr)           | 0.25 | 1    | 2    | 4    | 6    | 8    | 10   | 11   |
|---------------------|------|------|------|------|------|------|------|------|
| <b>Probe set ID</b> |      |      |      |      |      |      |      |      |
| 1394682_at          | 1.06 | 1.16 | 1.58 | 2.10 | 1.90 | 1.48 | 1.35 | 1.20 |
| 1385091_at          | 0.79 | 0.63 | 1.86 | 1.52 | 2.17 | 2.17 | 1.23 | 0.83 |
| 1394347_at          | 0.71 | 0.78 | 2.88 | 2.28 | 3.11 | 1.55 | 1.19 | 0.52 |
| 1394814_at          | 0.55 | 0.75 | 3.66 | 3.95 | 4.91 | 2.65 | 1.30 | 0.77 |
| 1390871_at          | 0.87 | 0.74 | 1.60 | 1.70 | 2.06 | 1.28 | 0.97 | 0.84 |
| 1394985_at          | 0.70 | 0.76 | 2.23 | 3.24 | 3.09 | 2.79 | 1.57 | 1.23 |
| 1375622_at          | 0.85 | 0.77 | 2.20 | 2.72 | 2.67 | 1.97 | 1.56 | 1.35 |
| 1392441_at          | 0.73 | 1.08 | 1.90 | 2.18 | 2.34 | 1.71 | 1.38 | 1.21 |
| 1376524_at          | 0.97 | 0.80 | 1.56 | 2.11 | 2.75 | 1.23 | 1.09 | 0.94 |
| 1392738_at          | 1.01 | 1.11 | 1.98 | 2.51 | 3.57 | 1.34 | 1.37 | 0.96 |
| 1395100_at          | 1.04 | 0.95 | 1.53 | 1.84 | 2.20 | 1.59 | 1.19 | 0.97 |
| 1393811_at          | 1.18 | 0.88 | 1.64 | 1.87 | 2.26 | 1.35 | 1.17 | 0.94 |
| 1369526_at          | 0.73 | 1.19 | 2.61 | 1.99 | 2.65 | 2.69 | 1.89 | 1.28 |
| 1392633_at          | 0.60 | 0.65 | 1.77 | 1.17 | 2.98 | 2.94 | 1.46 | 0.91 |
| 1382103_at          | 0.92 | 0.95 | 2.35 | 2.18 | 2.47 | 1.76 | 1.38 | 0.97 |
| 1380701_at          | 0.71 | 0.82 | 1.74 | 1.94 | 2.08 | 1.62 | 1.30 | 1.11 |
| 1396654_at          | 0.88 | 0.92 | 2.01 | 2.64 | 1.76 | 1.63 | 0.85 | 0.61 |
| 1385209_at          | 0.83 | 0.82 | 1.62 | 1.88 | 2.34 | 1.39 | 1.27 | 0.86 |
| 1380644_at          | 0.94 | 0.82 | 1.93 | 1.48 | 2.50 | 1.17 | 1.13 | 0.67 |
| 1393324_at          | 0.89 | 0.69 | 1.73 | 3.05 | 2.50 | 2.12 | 1.51 | 0.71 |
| 1381829_at          | 0.57 | 0.78 | 1.66 | 1.97 | 2.12 | 1.77 | 1.18 | 0.80 |
| 1385240_at          | 0.85 | 0.80 | 1.53 | 2.30 | 2.66 | 2.03 | 1.13 | 0.34 |
| 1385527_at          | 0.80 | 0.84 | 2.98 | 2.64 | 4.61 | 2.38 | 1.35 | 0.48 |
| 1391758_at          | 0.94 | 0.86 | 1.91 | 1.65 | 2.48 | 1.34 | 1.12 | 0.73 |
| 1381650_at          | 0.96 | 0.59 | 1.74 | 1.92 | 2.30 | 1.88 | 1.50 | 1.19 |
| 1382368_at          | 0.86 | 0.85 | 2.57 | 2.45 | 1.85 | 2.06 | 1.32 | 1.00 |
| 1377396_at          | 0.67 | 0.76 | 1.75 | 1.62 | 2.42 | 1.66 | 1.13 | 0.97 |
| 1393692_at          | 0.65 | 0.57 | 2.11 | 2.87 | 2.81 | 1.73 | 1.31 | 1.47 |
| 1393576_at          | 0.92 | 1.05 | 2.45 | 1.80 | 3.65 | 1.91 | 1.73 | 0.55 |
| 1394964_at          | 1.11 | 0.92 | 1.49 | 2.54 | 3.36 | 1.47 | 1.07 | 0.38 |
| 1397302_at          | 1.05 | 0.79 | 1.75 | 2.70 | 2.25 | 1.46 | 1.01 | 0.96 |
| 1374283_at          | 1.07 | 1.37 | 2.62 | 2.83 | 4.82 | 2.45 | 1.57 | 0.75 |
| 1376096_a_at        | 0.89 | 1.30 | 2.75 | 3.39 | 3.03 | 1.44 | 1.61 | 1.17 |
| 1375444_at          | 0.99 | 0.94 | 2.43 | 2.03 | 2.36 | 1.54 | 1.56 | 0.91 |
| 1388101_at          | 0.72 | 0.33 | 2.35 | 2.56 | 2.86 | 1.49 | 1.35 | 0.78 |
| 1395650_at          | 0.32 | 0.88 | 1.38 | 2.02 | 1.91 | 1.44 | 1.11 | 0.32 |

Supplementary Table 4: Mean Normalized Intensities of Individual Probe Sets Exhibiting Non-sinusoidal Circadian Expression.

| Time (Hr)           | 11.75 | 12.25 | 13   | 14   | 16   | 18   | 20   | 22   |
|---------------------|-------|-------|------|------|------|------|------|------|
| <b>Probe set ID</b> |       |       |      |      |      |      |      |      |
| 1384728_at          | 0.81  | 0.84  | 0.76 | 1.02 | 0.96 | 0.87 | 0.97 | 0.94 |
| 1384182_at          | 0.81  | 0.78  | 0.63 | 0.63 | 1.14 | 0.91 | 1.07 | 1.02 |
| 1393491_at          | 1.08  | 0.83  | 0.95 | 0.94 | 0.85 | 0.65 | 0.69 | 0.65 |
| 1379485_at          | 0.95  | 0.67  | 0.72 | 0.77 | 1.17 | 0.89 | 0.91 | 0.89 |
| 1380371_at          | 1.30  | 0.78  | 0.78 | 0.76 | 1.22 | 0.84 | 0.73 | 0.86 |
| 1383827_at          | 1.12  | 0.77  | 0.87 | 0.91 | 1.22 | 0.79 | 0.81 | 0.88 |
| 1379194_at          | 0.87  | 0.76  | 1.13 | 1.14 | 1.11 | 0.97 | 0.87 | 0.95 |
| 1382040_at          | 0.68  | 0.79  | 1.16 | 0.91 | 1.00 | 0.77 | 0.80 | 1.03 |
| 1395535_at          | 0.87  | 0.78  | 0.75 | 0.90 | 1.09 | 0.89 | 0.91 | 0.94 |
| 1394849_at          | 1.04  | 0.78  | 0.84 | 0.96 | 0.93 | 0.63 | 1.00 | 0.99 |
| 1394935_at          | 0.87  | 0.58  | 0.93 | 0.88 | 1.24 | 0.87 | 0.96 | 1.01 |
| 1375453_at          | 0.46  | 0.70  | 1.05 | 1.15 | 1.07 | 0.85 | 0.98 | 0.84 |
| 1373303_at          | 0.95  | 0.73  | 0.65 | 0.87 | 1.13 | 0.81 | 0.87 | 0.88 |
| 1397286_at          | 1.04  | 0.95  | 0.86 | 0.86 | 0.90 | 0.84 | 0.86 | 0.86 |
| 1373347_at          | 1.05  | 0.87  | 0.99 | 0.88 | 1.05 | 0.81 | 0.92 | 0.92 |
| 1393795_at          | 0.71  | 0.88  | 1.04 | 0.99 | 0.95 | 0.81 | 0.74 | 0.88 |
| 1380503_at          | 0.98  | 0.82  | 0.87 | 0.96 | 1.11 | 0.83 | 0.75 | 0.96 |
| 1390345_at          | 0.98  | 0.84  | 0.97 | 0.82 | 1.01 | 0.74 | 0.91 | 0.89 |
| 1390706_at          | 0.95  | 0.74  | 0.83 | 0.73 | 1.18 | 0.84 | 0.82 | 0.94 |
| 1369628_at          | 0.95  | 0.63  | 0.64 | 0.52 | 1.56 | 0.81 | 0.78 | 1.02 |
| 1384792_at          | 0.87  | 0.76  | 0.83 | 0.94 | 1.17 | 0.88 | 0.80 | 0.82 |
| 1384146_at          | 1.04  | 1.03  | 0.82 | 0.78 | 1.21 | 0.77 | 0.80 | 0.83 |
| 1385350_at          | 1.21  | 0.82  | 0.73 | 0.67 | 1.22 | 0.91 | 0.90 | 1.10 |
| 1392309_at          | 0.66  | 0.74  | 0.90 | 0.97 | 1.19 | 1.06 | 0.86 | 1.04 |
| 1394436_at          | 1.20  | 0.88  | 0.77 | 0.79 | 1.22 | 0.73 | 0.86 | 0.72 |
| 1382939_at          | 1.22  | 0.80  | 0.87 | 0.90 | 1.14 | 0.84 | 0.85 | 0.87 |
| 1385087_at          | 1.66  | 0.99  | 0.74 | 0.93 | 0.96 | 0.76 | 0.80 | 0.86 |
| 1389986_at          | 1.21  | 0.66  | 0.62 | 0.68 | 1.05 | 0.76 | 0.93 | 0.98 |
| 1384854_at          | 1.41  | 0.87  | 0.70 | 0.81 | 0.90 | 0.70 | 0.90 | 0.77 |
| 1390549_at          | 0.82  | 0.86  | 0.90 | 0.84 | 0.94 | 1.05 | 0.94 | 0.97 |
| 1395105_at          | 0.93  | 0.84  | 0.82 | 0.88 | 1.13 | 0.76 | 0.84 | 0.86 |
| 1393615_at          | 1.79  | 0.88  | 0.64 | 0.50 | 0.92 | 0.52 | 0.65 | 0.71 |
| 1378347_at          | 0.82  | 0.84  | 0.96 | 1.07 | 0.99 | 0.93 | 0.79 | 0.92 |
| 1384890_at          | 0.78  | 0.76  | 0.85 | 0.65 | 1.15 | 0.81 | 0.93 | 0.94 |
| 1379733_at          | 0.82  | 0.64  | 0.71 | 0.55 | 0.78 | 0.81 | 1.03 | 0.88 |
| 1380144_at          | 0.61  | 0.71  | 0.95 | 0.97 | 0.78 | 1.03 | 1.05 | 0.93 |
| 1379822_at          | 0.70  | 0.67  | 0.82 | 0.90 | 1.17 | 1.05 | 0.87 | 0.87 |
| 1381100_at          | 1.12  | 0.85  | 0.83 | 0.83 | 1.05 | 1.07 | 0.86 | 0.93 |
| 1383266_at          | 0.90  | 0.88  | 0.77 | 0.80 | 0.87 | 0.90 | 1.03 | 1.10 |
| 1371173_a_at        | 0.99  | 0.95  | 0.82 | 0.71 | 0.95 | 0.79 | 0.81 | 0.98 |



Supplementary Table 4: Mean Normalized Intensities of Individual Probe Sets Exhibiting Non-sinusoidal Circadian Expression.

| Time (Hr)           | 11.75 | 12.25 | 13   | 14   | 16   | 18   | 20   | 22   |
|---------------------|-------|-------|------|------|------|------|------|------|
| <b>Probe set ID</b> |       |       |      |      |      |      |      |      |
| 1394682_at          | 0.74  | 0.80  | 0.80 | 0.86 | 1.14 | 0.83 | 0.78 | 1.24 |
| 1385091_at          | 1.00  | 0.71  | 0.92 | 0.88 | 1.07 | 0.80 | 0.69 | 0.97 |
| 1394347_at          | 0.67  | 0.94  | 0.66 | 1.18 | 1.34 | 0.86 | 1.27 | 0.76 |
| 1394814_at          | 0.79  | 0.72  | 0.70 | 0.84 | 1.54 | 0.79 | 0.83 | 0.97 |
| 1390871_at          | 1.01  | 0.84  | 0.85 | 0.96 | 1.16 | 0.90 | 0.95 | 1.00 |
| 1394985_at          | 1.01  | 0.75  | 0.69 | 0.54 | 1.41 | 0.85 | 0.86 | 0.75 |
| 1375622_at          | 0.81  | 0.70  | 0.61 | 0.65 | 1.28 | 0.94 | 0.74 | 0.94 |
| 1392441_at          | 0.95  | 0.74  | 0.64 | 0.68 | 0.96 | 0.68 | 0.59 | 1.18 |
| 1376524_at          | 0.82  | 0.54  | 1.07 | 0.88 | 1.11 | 0.66 | 0.72 | 0.75 |
| 1392738_at          | 0.91  | 0.75  | 0.90 | 1.09 | 1.04 | 0.78 | 0.91 | 0.81 |
| 1395100_at          | 0.83  | 0.94  | 0.96 | 1.07 | 0.98 | 0.73 | 0.80 | 0.95 |
| 1393811_at          | 0.80  | 0.71  | 0.89 | 0.80 | 0.95 | 0.76 | 0.92 | 0.94 |
| 1369526_at          | 0.60  | 0.98  | 0.97 | 0.82 | 0.73 | 0.52 | 0.76 | 0.84 |
| 1392633_at          | 0.80  | 0.81  | 0.71 | 0.67 | 1.04 | 0.86 | 0.85 | 0.89 |
| 1382103_at          | 1.06  | 0.90  | 0.76 | 0.87 | 1.16 | 0.84 | 0.85 | 0.68 |
| 1380701_at          | 0.83  | 0.80  | 0.80 | 0.40 | 0.99 | 0.88 | 1.09 | 1.03 |
| 1396654_at          | 0.82  | 1.02  | 0.90 | 0.90 | 1.22 | 0.90 | 0.57 | 0.68 |
| 1385209_at          | 0.92  | 0.78  | 0.57 | 0.73 | 1.15 | 1.00 | 1.17 | 0.97 |
| 1380644_at          | 0.62  | 0.60  | 0.97 | 0.96 | 1.11 | 0.68 | 0.83 | 0.86 |
| 1393324_at          | 0.81  | 0.79  | 0.93 | 0.98 | 1.14 | 0.82 | 0.92 | 1.02 |
| 1381829_at          | 1.26  | 0.53  | 0.62 | 0.66 | 0.98 | 0.48 | 0.78 | 0.67 |
| 1385240_at          | 0.65  | 0.61  | 0.72 | 0.84 | 1.41 | 1.00 | 0.93 | 0.89 |
| 1385527_at          | 0.53  | 0.88  | 0.73 | 0.78 | 1.21 | 0.52 | 0.74 | 1.15 |
| 1391758_at          | 0.79  | 0.77  | 0.99 | 0.96 | 1.08 | 1.00 | 1.00 | 0.87 |
| 1381650_at          | 0.63  | 0.76  | 0.94 | 0.99 | 0.84 | 0.82 | 0.68 | 0.79 |
| 1382368_at          | 0.57  | 0.49  | 0.91 | 0.37 | 0.69 | 0.38 | 0.68 | 0.98 |
| 1377396_at          | 0.69  | 0.71  | 0.56 | 0.96 | 1.21 | 0.71 | 1.40 | 1.00 |
| 1393692_at          | 1.00  | 0.54  | 0.65 | 0.64 | 1.24 | 0.86 | 0.90 | 0.71 |
| 1393576_at          | 0.61  | 1.07  | 0.71 | 1.22 | 0.85 | 0.92 | 0.82 | 1.11 |
| 1394964_at          | 0.42  | 0.39  | 1.06 | 0.81 | 1.25 | 0.65 | 0.76 | 0.83 |
| 1397302_at          | 1.07  | 0.87  | 0.74 | 0.90 | 1.31 | 0.73 | 1.02 | 0.78 |
| 1374283_at          | 0.38  | 0.71  | 0.96 | 1.22 | 1.55 | 0.61 | 0.91 | 0.84 |
| 1376096_a_at        | 1.11  | 0.84  | 0.95 | 0.70 | 1.03 | 1.01 | 0.91 | 0.89 |
| 1375444_at          | 0.53  | 0.45  | 0.83 | 0.44 | 1.05 | 0.77 | 0.39 | 0.81 |
| 1388101_at          | 1.02  | 0.70  | 0.68 | 0.92 | 0.99 | 0.84 | 0.94 | 1.33 |
| 1395650_at          | 0.92  | 0.69  | 0.52 | 0.53 | 0.85 | 0.70 | 0.92 | 0.53 |

Supplementary Table 4: Mean Normalized Intensities of Individual Probe Sets Exhibiting Non-sinusoidal Circadian Expression.

| Time (Hr)           | 23   | 23.75 | 24.25 | 25   | 26   | 28   | 30   | 32   |
|---------------------|------|-------|-------|------|------|------|------|------|
| <b>Probe set ID</b> |      |       |       |      |      |      |      |      |
| 1384728_at          | 0.73 | 0.99  | 0.71  | 1.07 | 1.89 | 1.57 | 2.15 | 2.18 |
| 1384182_at          | 0.75 | 1.06  | 0.50  | 0.74 | 1.91 | 2.22 | 2.58 | 1.68 |
| 1393491_at          | 0.77 | 0.78  | 1.07  | 0.94 | 2.08 | 2.65 | 1.95 | 1.53 |
| 1379485_at          | 0.81 | 0.88  | 0.57  | 0.61 | 2.01 | 1.99 | 2.15 | 1.55 |
| 1380371_at          | 0.83 | 0.83  | 0.98  | 0.94 | 1.69 | 2.26 | 2.56 | 1.68 |
| 1383827_at          | 0.78 | 0.78  | 0.68  | 0.74 | 1.80 | 2.42 | 2.54 | 1.75 |
| 1379194_at          | 0.94 | 0.81  | 0.90  | 1.10 | 2.42 | 2.01 | 2.09 | 1.14 |
| 1382040_at          | 0.97 | 1.17  | 1.02  | 1.07 | 2.18 | 2.04 | 2.38 | 1.62 |
| 1395535_at          | 0.96 | 1.33  | 0.92  | 0.89 | 2.09 | 2.19 | 2.06 | 1.52 |
| 1394849_at          | 0.68 | 0.72  | 0.67  | 0.64 | 1.83 | 2.19 | 2.63 | 1.57 |
| 1394935_at          | 0.83 | 0.77  | 0.77  | 0.90 | 1.49 | 2.02 | 2.21 | 1.27 |
| 1375453_at          | 0.71 | 0.90  | 0.89  | 0.90 | 1.52 | 1.62 | 2.14 | 1.39 |
| 1373303_at          | 0.82 | 1.00  | 0.77  | 0.66 | 1.80 | 1.91 | 2.23 | 1.39 |
| 1397286_at          | 0.59 | 0.99  | 0.92  | 0.83 | 1.82 | 1.78 | 2.22 | 1.60 |
| 1373347_at          | 0.86 | 0.93  | 0.78  | 0.98 | 1.61 | 2.14 | 1.97 | 1.61 |
| 1393795_at          | 0.78 | 0.96  | 1.01  | 0.99 | 1.59 | 2.01 | 1.48 | 1.32 |
| 1380503_at          | 0.94 | 0.97  | 0.85  | 0.83 | 1.63 | 1.75 | 2.03 | 1.25 |
| 1390345_at          | 0.89 | 0.83  | 1.17  | 0.89 | 1.48 | 1.97 | 2.04 | 1.23 |
| 1390706_at          | 0.74 | 0.85  | 0.71  | 0.76 | 1.62 | 2.12 | 2.01 | 1.09 |
| 1369628_at          | 0.53 | 0.87  | 0.83  | 0.63 | 3.57 | 3.24 | 3.31 | 1.58 |
| 1384792_at          | 0.96 | 0.82  | 1.07  | 0.89 | 1.64 | 1.96 | 2.11 | 1.16 |
| 1384146_at          | 0.90 | 0.79  | 0.86  | 0.92 | 1.31 | 2.01 | 1.90 | 1.37 |
| 1385350_at          | 0.86 | 0.79  | 0.72  | 0.80 | 1.64 | 2.26 | 1.77 | 1.42 |
| 1392309_at          | 0.72 | 1.02  | 0.72  | 0.77 | 2.15 | 3.08 | 2.65 | 2.14 |
| 1394436_at          | 0.72 | 0.78  | 0.83  | 0.71 | 2.54 | 2.27 | 2.77 | 2.14 |
| 1382939_at          | 0.86 | 0.90  | 1.00  | 1.05 | 2.10 | 2.11 | 2.33 | 1.57 |
| 1385087_at          | 0.76 | 0.92  | 0.81  | 0.92 | 2.31 | 2.93 | 3.44 | 2.45 |
| 1389986_at          | 0.73 | 0.85  | 0.88  | 0.73 | 2.37 | 3.18 | 3.19 | 2.02 |
| 1384854_at          | 0.73 | 0.91  | 0.82  | 0.83 | 2.86 | 2.57 | 3.52 | 2.33 |
| 1390549_at          | 0.93 | 1.09  | 0.91  | 0.96 | 2.19 | 2.03 | 2.00 | 1.75 |
| 1395105_at          | 0.82 | 0.83  | 0.55  | 0.83 | 2.15 | 2.24 | 2.71 | 1.84 |
| 1393615_at          | 0.74 | 0.93  | 0.74  | 1.14 | 4.94 | 4.49 | 5.43 | 3.87 |
| 1378347_at          | 0.93 | 1.00  | 0.87  | 0.95 | 1.40 | 1.48 | 2.06 | 1.38 |
| 1384890_at          | 0.80 | 0.99  | 0.85  | 0.86 | 1.83 | 1.80 | 2.67 | 1.53 |
| 1379733_at          | 1.15 | 1.07  | 1.19  | 1.25 | 2.16 | 2.10 | 2.03 | 1.42 |
| 1380144_at          | 0.80 | 1.02  | 1.14  | 0.89 | 1.73 | 2.23 | 2.39 | 1.96 |
| 1379822_at          | 0.96 | 0.96  | 1.12  | 0.88 | 1.71 | 1.56 | 2.31 | 1.66 |
| 1381100_at          | 0.87 | 0.99  | 0.73  | 0.82 | 1.56 | 2.05 | 1.83 | 1.42 |
| 1383266_at          | 1.12 | 1.13  | 1.02  | 0.84 | 1.72 | 1.54 | 2.42 | 1.23 |
| 1371173_a_at        | 0.86 | 1.00  | 0.83  | 1.11 | 2.51 | 2.22 | 3.92 | 2.59 |

Supplementary Table 4: Mean Normalized Intensities of Individual Probe Sets Exhibiting Non-sinusoidal Circadian Expression.

| Time (Hr)           | 23   | 23.75 | 24.25 | 25   | 26   | 28   | 30   | 32   |
|---------------------|------|-------|-------|------|------|------|------|------|
| <b>Probe set ID</b> |      |       |       |      |      |      |      |      |
| 1394682_at          | 0.79 | 1.13  | 1.06  | 1.16 | 1.58 | 2.10 | 1.90 | 1.48 |
| 1385091_at          | 1.04 | 0.73  | 0.79  | 0.63 | 1.86 | 1.52 | 2.17 | 2.17 |
| 1394347_at          | 0.58 | 0.78  | 0.71  | 0.78 | 2.88 | 2.28 | 3.11 | 1.55 |
| 1394814_at          | 0.81 | 0.94  | 0.55  | 0.75 | 3.66 | 3.95 | 4.91 | 2.65 |
| 1390871_at          | 0.85 | 0.99  | 0.87  | 0.74 | 1.60 | 1.70 | 2.06 | 1.28 |
| 1394985_at          | 0.69 | 0.56  | 0.70  | 0.76 | 2.23 | 3.24 | 3.09 | 2.79 |
| 1375622_at          | 0.72 | 0.98  | 0.85  | 0.77 | 2.20 | 2.72 | 2.67 | 1.97 |
| 1392441_at          | 0.75 | 0.98  | 0.73  | 1.08 | 1.90 | 2.18 | 2.34 | 1.71 |
| 1376524_at          | 0.74 | 0.75  | 0.97  | 0.80 | 1.56 | 2.11 | 2.75 | 1.23 |
| 1392738_at          | 0.94 | 0.84  | 1.01  | 1.11 | 1.98 | 2.51 | 3.57 | 1.34 |
| 1395100_at          | 0.68 | 0.96  | 1.04  | 0.95 | 1.53 | 1.84 | 2.20 | 1.59 |
| 1393811_at          | 0.79 | 1.18  | 1.18  | 0.88 | 1.64 | 1.87 | 2.26 | 1.35 |
| 1369526_at          | 0.87 | 0.98  | 0.73  | 1.19 | 2.61 | 1.99 | 2.65 | 2.69 |
| 1392633_at          | 0.63 | 1.21  | 0.60  | 0.65 | 1.77 | 1.17 | 2.98 | 2.94 |
| 1382103_at          | 0.84 | 1.11  | 0.92  | 0.95 | 2.35 | 2.18 | 2.47 | 1.76 |
| 1380701_at          | 0.90 | 0.78  | 0.71  | 0.82 | 1.74 | 1.94 | 2.08 | 1.62 |
| 1396654_at          | 0.69 | 0.76  | 0.88  | 0.92 | 2.01 | 2.64 | 1.76 | 1.63 |
| 1385209_at          | 0.81 | 1.08  | 0.83  | 0.82 | 1.62 | 1.88 | 2.34 | 1.39 |
| 1380644_at          | 0.75 | 0.89  | 0.94  | 0.82 | 1.93 | 1.48 | 2.50 | 1.17 |
| 1393324_at          | 0.62 | 0.88  | 0.89  | 0.69 | 1.73 | 3.05 | 2.50 | 2.12 |
| 1381829_at          | 0.84 | 1.06  | 0.57  | 0.78 | 1.66 | 1.97 | 2.12 | 1.77 |
| 1385240_at          | 0.80 | 1.46  | 0.85  | 0.80 | 1.53 | 2.30 | 2.66 | 2.03 |
| 1385527_at          | 0.37 | 0.78  | 0.80  | 0.84 | 2.98 | 2.64 | 4.61 | 2.38 |
| 1391758_at          | 0.76 | 1.09  | 0.94  | 0.86 | 1.91 | 1.65 | 2.48 | 1.34 |
| 1381650_at          | 0.64 | 0.93  | 0.96  | 0.59 | 1.74 | 1.92 | 2.30 | 1.88 |
| 1382368_at          | 0.60 | 0.46  | 0.86  | 0.85 | 2.57 | 2.45 | 1.85 | 2.06 |
| 1377396_at          | 0.77 | 1.08  | 0.67  | 0.76 | 1.75 | 1.62 | 2.42 | 1.66 |
| 1393692_at          | 0.67 | 0.77  | 0.65  | 0.57 | 2.11 | 2.87 | 2.81 | 1.73 |
| 1393576_at          | 0.50 | 0.54  | 0.92  | 1.05 | 2.45 | 1.80 | 3.65 | 1.91 |
| 1394964_at          | 0.88 | 1.02  | 1.11  | 0.92 | 1.49 | 2.54 | 3.36 | 1.47 |
| 1397302_at          | 0.91 | 0.83  | 1.05  | 0.79 | 1.75 | 2.70 | 2.25 | 1.46 |
| 1374283_at          | 0.67 | 0.87  | 1.07  | 1.37 | 2.62 | 2.83 | 4.82 | 2.45 |
| 1376096_a_at        | 0.81 | 0.97  | 0.89  | 1.30 | 2.75 | 3.39 | 3.03 | 1.44 |
| 1375444_at          | 0.55 | 1.32  | 0.99  | 0.94 | 2.43 | 2.03 | 2.36 | 1.54 |
| 1388101_at          | 0.82 | 0.99  | 0.72  | 0.33 | 2.35 | 2.56 | 2.86 | 1.49 |
| 1395650_at          | 0.52 | 0.89  | 0.32  | 0.88 | 1.38 | 2.02 | 1.91 | 1.44 |

Supplementary Table 4: Mean Normalized Intensities of Individual Probe Sets Exhibiting Non-sinusoidal Circadian Expression.

| Time (Hr)           | 34   | 35   | 35.75 | 36.25 | 37   | 38   | 40   | 42   |
|---------------------|------|------|-------|-------|------|------|------|------|
| <b>Probe set ID</b> |      |      |       |       |      |      |      |      |
| 1384728_at          | 1.26 | 1.08 | 0.81  | 0.84  | 0.76 | 1.02 | 0.96 | 0.87 |
| 1384182_at          | 1.43 | 0.87 | 0.81  | 0.78  | 0.63 | 0.63 | 1.14 | 0.91 |
| 1393491_at          | 1.18 | 1.01 | 1.08  | 0.83  | 0.95 | 0.94 | 0.85 | 0.65 |
| 1379485_at          | 1.16 | 0.98 | 0.95  | 0.67  | 0.72 | 0.77 | 1.17 | 0.89 |
| 1380371_at          | 1.33 | 1.26 | 1.30  | 0.78  | 0.78 | 0.76 | 1.22 | 0.84 |
| 1383827_at          | 1.52 | 1.27 | 1.12  | 0.77  | 0.87 | 0.91 | 1.22 | 0.79 |
| 1379194_at          | 1.17 | 0.81 | 0.87  | 0.76  | 1.13 | 1.14 | 1.11 | 0.97 |
| 1382040_at          | 1.20 | 1.04 | 0.68  | 0.79  | 1.16 | 0.91 | 1.00 | 0.77 |
| 1395535_at          | 1.24 | 1.05 | 0.87  | 0.78  | 0.75 | 0.90 | 1.09 | 0.89 |
| 1394849_at          | 1.12 | 0.93 | 1.04  | 0.78  | 0.84 | 0.96 | 0.93 | 0.63 |
| 1394935_at          | 1.29 | 0.86 | 0.87  | 0.58  | 0.93 | 0.88 | 1.24 | 0.87 |
| 1375453_at          | 1.02 | 0.53 | 0.46  | 0.70  | 1.05 | 1.15 | 1.07 | 0.85 |
| 1373303_at          | 1.22 | 1.16 | 0.95  | 0.73  | 0.65 | 0.87 | 1.13 | 0.81 |
| 1397286_at          | 1.18 | 0.86 | 1.04  | 0.95  | 0.86 | 0.86 | 0.90 | 0.84 |
| 1373347_at          | 1.42 | 1.19 | 1.05  | 0.87  | 0.99 | 0.88 | 1.05 | 0.81 |
| 1393795_at          | 1.17 | 1.02 | 0.71  | 0.88  | 1.04 | 0.99 | 0.95 | 0.81 |
| 1380503_at          | 1.26 | 1.21 | 0.98  | 0.82  | 0.87 | 0.96 | 1.11 | 0.83 |
| 1390345_at          | 1.22 | 1.03 | 0.98  | 0.84  | 0.97 | 0.82 | 1.01 | 0.74 |
| 1390706_at          | 1.09 | 0.81 | 0.95  | 0.74  | 0.83 | 0.73 | 1.18 | 0.84 |
| 1369628_at          | 1.36 | 1.01 | 0.95  | 0.63  | 0.64 | 0.52 | 1.56 | 0.81 |
| 1384792_at          | 1.05 | 0.88 | 0.87  | 0.76  | 0.83 | 0.94 | 1.17 | 0.88 |
| 1384146_at          | 1.30 | 0.81 | 1.04  | 1.03  | 0.82 | 0.78 | 1.21 | 0.77 |
| 1385350_at          | 1.16 | 0.98 | 1.21  | 0.82  | 0.73 | 0.67 | 1.22 | 0.91 |
| 1392309_at          | 1.64 | 0.87 | 0.66  | 0.74  | 0.90 | 0.97 | 1.19 | 1.06 |
| 1394436_at          | 1.35 | 1.34 | 1.20  | 0.88  | 0.77 | 0.79 | 1.22 | 0.73 |
| 1382939_at          | 1.38 | 1.25 | 1.22  | 0.80  | 0.87 | 0.90 | 1.14 | 0.84 |
| 1385087_at          | 1.97 | 1.39 | 1.66  | 0.99  | 0.74 | 0.93 | 0.96 | 0.76 |
| 1389986_at          | 1.71 | 1.69 | 1.21  | 0.66  | 0.62 | 0.68 | 1.05 | 0.76 |
| 1384854_at          | 1.81 | 1.45 | 1.41  | 0.87  | 0.70 | 0.81 | 0.90 | 0.70 |
| 1390549_at          | 1.25 | 0.77 | 0.82  | 0.86  | 0.90 | 0.84 | 0.94 | 1.05 |
| 1395105_at          | 1.24 | 0.95 | 0.93  | 0.84  | 0.82 | 0.88 | 1.13 | 0.76 |
| 1393615_at          | 2.51 | 1.97 | 1.79  | 0.88  | 0.64 | 0.50 | 0.92 | 0.52 |
| 1378347_at          | 1.00 | 1.06 | 0.82  | 0.84  | 0.96 | 1.07 | 0.99 | 0.93 |
| 1384890_at          | 1.27 | 0.78 | 0.78  | 0.76  | 0.85 | 0.65 | 1.15 | 0.81 |
| 1379733_at          | 1.35 | 0.89 | 0.82  | 0.64  | 0.71 | 0.55 | 0.78 | 0.81 |
| 1380144_at          | 1.53 | 0.74 | 0.61  | 0.71  | 0.95 | 0.97 | 0.78 | 1.03 |
| 1379822_at          | 1.02 | 0.96 | 0.70  | 0.67  | 0.82 | 0.90 | 1.17 | 1.05 |
| 1381100_at          | 1.21 | 1.00 | 1.12  | 0.85  | 0.83 | 0.83 | 1.05 | 1.07 |
| 1383266_at          | 1.27 | 0.73 | 0.90  | 0.88  | 0.77 | 0.80 | 0.87 | 0.90 |
| 1371173_a_at        | 2.00 | 1.54 | 0.99  | 0.95  | 0.82 | 0.71 | 0.95 | 0.79 |

Supplementary Table 4: Mean Normalized Intensities of Individual Probe Sets Exhibiting Non-sinusoidal Circadian Expression.

| Time (Hr)           | 34   | 35   | 35.75 | 36.25 | 37   | 38   | 40   | 42   |
|---------------------|------|------|-------|-------|------|------|------|------|
| <b>Probe set ID</b> |      |      |       |       |      |      |      |      |
| 1394682_at          | 1.35 | 1.20 | 0.74  | 0.80  | 0.80 | 0.86 | 1.14 | 0.83 |
| 1385091_at          | 1.23 | 0.83 | 1.00  | 0.71  | 0.92 | 0.88 | 1.07 | 0.80 |
| 1394347_at          | 1.19 | 0.52 | 0.67  | 0.94  | 0.66 | 1.18 | 1.34 | 0.86 |
| 1394814_at          | 1.30 | 0.77 | 0.79  | 0.72  | 0.70 | 0.84 | 1.54 | 0.79 |
| 1390871_at          | 0.97 | 0.84 | 1.01  | 0.84  | 0.85 | 0.96 | 1.16 | 0.90 |
| 1394985_at          | 1.57 | 1.23 | 1.01  | 0.75  | 0.69 | 0.54 | 1.41 | 0.85 |
| 1375622_at          | 1.56 | 1.35 | 0.81  | 0.70  | 0.61 | 0.65 | 1.28 | 0.94 |
| 1392441_at          | 1.38 | 1.21 | 0.95  | 0.74  | 0.64 | 0.68 | 0.96 | 0.68 |
| 1376524_at          | 1.09 | 0.94 | 0.82  | 0.54  | 1.07 | 0.88 | 1.11 | 0.66 |
| 1392738_at          | 1.37 | 0.96 | 0.91  | 0.75  | 0.90 | 1.09 | 1.04 | 0.78 |
| 1395100_at          | 1.19 | 0.97 | 0.83  | 0.94  | 0.96 | 1.07 | 0.98 | 0.73 |
| 1393811_at          | 1.17 | 0.94 | 0.80  | 0.71  | 0.89 | 0.80 | 0.95 | 0.76 |
| 1369526_at          | 1.89 | 1.28 | 0.60  | 0.98  | 0.97 | 0.82 | 0.73 | 0.52 |
| 1392633_at          | 1.46 | 0.91 | 0.80  | 0.81  | 0.71 | 0.67 | 1.04 | 0.86 |
| 1382103_at          | 1.38 | 0.97 | 1.06  | 0.90  | 0.76 | 0.87 | 1.16 | 0.84 |
| 1380701_at          | 1.30 | 1.11 | 0.83  | 0.80  | 0.80 | 0.40 | 0.99 | 0.88 |
| 1396654_at          | 0.85 | 0.61 | 0.82  | 1.02  | 0.90 | 0.90 | 1.22 | 0.90 |
| 1385209_at          | 1.27 | 0.86 | 0.92  | 0.78  | 0.57 | 0.73 | 1.15 | 1.00 |
| 1380644_at          | 1.13 | 0.67 | 0.62  | 0.60  | 0.97 | 0.96 | 1.11 | 0.68 |
| 1393324_at          | 1.51 | 0.71 | 0.81  | 0.79  | 0.93 | 0.98 | 1.14 | 0.82 |
| 1381829_at          | 1.18 | 0.80 | 1.26  | 0.53  | 0.62 | 0.66 | 0.98 | 0.48 |
| 1385240_at          | 1.13 | 0.34 | 0.65  | 0.61  | 0.72 | 0.84 | 1.41 | 1.00 |
| 1385527_at          | 1.35 | 0.48 | 0.53  | 0.88  | 0.73 | 0.78 | 1.21 | 0.52 |
| 1391758_at          | 1.12 | 0.73 | 0.79  | 0.77  | 0.99 | 0.96 | 1.08 | 1.00 |
| 1381650_at          | 1.50 | 1.19 | 0.63  | 0.76  | 0.94 | 0.99 | 0.84 | 0.82 |
| 1382368_at          | 1.32 | 1.00 | 0.57  | 0.49  | 0.91 | 0.37 | 0.69 | 0.38 |
| 1377396_at          | 1.13 | 0.97 | 0.69  | 0.71  | 0.56 | 0.96 | 1.21 | 0.71 |
| 1393692_at          | 1.31 | 1.47 | 1.00  | 0.54  | 0.65 | 0.64 | 1.24 | 0.86 |
| 1393576_at          | 1.73 | 0.55 | 0.61  | 1.07  | 0.71 | 1.22 | 0.85 | 0.92 |
| 1394964_at          | 1.07 | 0.38 | 0.42  | 0.39  | 1.06 | 0.81 | 1.25 | 0.65 |
| 1397302_at          | 1.01 | 0.96 | 1.07  | 0.87  | 0.74 | 0.90 | 1.31 | 0.73 |
| 1374283_at          | 1.57 | 0.75 | 0.38  | 0.71  | 0.96 | 1.22 | 1.55 | 0.61 |
| 1376096_a_at        | 1.61 | 1.17 | 1.11  | 0.84  | 0.95 | 0.70 | 1.03 | 1.01 |
| 1375444_at          | 1.56 | 0.91 | 0.53  | 0.45  | 0.83 | 0.44 | 1.05 | 0.77 |
| 1388101_at          | 1.35 | 0.78 | 1.02  | 0.70  | 0.68 | 0.92 | 0.99 | 0.84 |
| 1395650_at          | 1.11 | 0.32 | 0.92  | 0.69  | 0.52 | 0.53 | 0.85 | 0.70 |

Supplementary Table 4: Mean Normalized Intensities of Individual Probe Sets Exhibiting Non-sinusoidal Circadian Expression.

| Time (Hr)           | 44   | 46   | 47   | 47.75 |
|---------------------|------|------|------|-------|
| <b>Probe set ID</b> |      |      |      |       |
| 1384728_at          | 0.97 | 0.94 | 0.73 | 0.99  |
| 1384182_at          | 1.07 | 1.02 | 0.75 | 1.06  |
| 1393491_at          | 0.69 | 0.65 | 0.77 | 0.78  |
| 1379485_at          | 0.91 | 0.89 | 0.81 | 0.88  |
| 1380371_at          | 0.73 | 0.86 | 0.83 | 0.83  |
| 1383827_at          | 0.81 | 0.88 | 0.78 | 0.78  |
| 1379194_at          | 0.87 | 0.95 | 0.94 | 0.81  |
| 1382040_at          | 0.80 | 1.03 | 0.97 | 1.17  |
| 1395535_at          | 0.91 | 0.94 | 0.96 | 1.33  |
| 1394849_at          | 1.00 | 0.99 | 0.68 | 0.72  |
| 1394935_at          | 0.96 | 1.01 | 0.83 | 0.77  |
| 1375453_at          | 0.98 | 0.84 | 0.71 | 0.90  |
| 1373303_at          | 0.87 | 0.88 | 0.82 | 1.00  |
| 1397286_at          | 0.86 | 0.86 | 0.59 | 0.99  |
| 1373347_at          | 0.92 | 0.92 | 0.86 | 0.93  |
| 1393795_at          | 0.74 | 0.88 | 0.78 | 0.96  |
| 1380503_at          | 0.75 | 0.96 | 0.94 | 0.97  |
| 1390345_at          | 0.91 | 0.89 | 0.89 | 0.83  |
| 1390706_at          | 0.82 | 0.94 | 0.74 | 0.85  |
| 1369628_at          | 0.78 | 1.02 | 0.53 | 0.87  |
| 1384792_at          | 0.80 | 0.82 | 0.96 | 0.82  |
| 1384146_at          | 0.80 | 0.83 | 0.90 | 0.79  |
| 1385350_at          | 0.90 | 1.10 | 0.86 | 0.79  |
| 1392309_at          | 0.86 | 1.04 | 0.72 | 1.02  |
| 1394436_at          | 0.86 | 0.72 | 0.72 | 0.78  |
| 1382939_at          | 0.85 | 0.87 | 0.86 | 0.90  |
| 1385087_at          | 0.80 | 0.86 | 0.76 | 0.92  |
| 1389986_at          | 0.93 | 0.98 | 0.73 | 0.85  |
| 1384854_at          | 0.90 | 0.77 | 0.73 | 0.91  |
| 1390549_at          | 0.94 | 0.97 | 0.93 | 1.09  |
| 1395105_at          | 0.84 | 0.86 | 0.82 | 0.83  |
| 1393615_at          | 0.65 | 0.71 | 0.74 | 0.93  |
| 1378347_at          | 0.79 | 0.92 | 0.93 | 1.00  |
| 1384890_at          | 0.93 | 0.94 | 0.80 | 0.99  |
| 1379733_at          | 1.03 | 0.88 | 1.15 | 1.07  |
| 1380144_at          | 1.05 | 0.93 | 0.80 | 1.02  |
| 1379822_at          | 0.87 | 0.87 | 0.96 | 0.96  |
| 1381100_at          | 0.86 | 0.93 | 0.87 | 0.99  |
| 1383266_at          | 1.03 | 1.10 | 1.12 | 1.13  |
| 1371173_a_at        | 0.81 | 0.98 | 0.86 | 1.00  |

Supplementary Table 4: Mean Normalized Intensities of Individual Probe Sets Exhibiting Non-sinusoidal Circadian Expression.

| Time (Hr)           | 44   | 46   | 47   | 47.75 |
|---------------------|------|------|------|-------|
| <b>Probe set ID</b> |      |      |      |       |
| 1394682_at          | 0.78 | 1.24 | 0.79 | 1.13  |
| 1385091_at          | 0.69 | 0.97 | 1.04 | 0.73  |
| 1394347_at          | 1.27 | 0.76 | 0.58 | 0.78  |
| 1394814_at          | 0.83 | 0.97 | 0.81 | 0.94  |
| 1390871_at          | 0.95 | 1.00 | 0.85 | 0.99  |
| 1394985_at          | 0.86 | 0.75 | 0.69 | 0.56  |
| 1375622_at          | 0.74 | 0.94 | 0.72 | 0.98  |
| 1392441_at          | 0.59 | 1.18 | 0.75 | 0.98  |
| 1376524_at          | 0.72 | 0.75 | 0.74 | 0.75  |
| 1392738_at          | 0.91 | 0.81 | 0.94 | 0.84  |
| 1395100_at          | 0.80 | 0.95 | 0.68 | 0.96  |
| 1393811_at          | 0.92 | 0.94 | 0.79 | 1.18  |
| 1369526_at          | 0.76 | 0.84 | 0.87 | 0.98  |
| 1392633_at          | 0.85 | 0.89 | 0.63 | 1.21  |
| 1382103_at          | 0.85 | 0.68 | 0.84 | 1.11  |
| 1380701_at          | 1.09 | 1.03 | 0.90 | 0.78  |
| 1396654_at          | 0.57 | 0.68 | 0.69 | 0.76  |
| 1385209_at          | 1.17 | 0.97 | 0.81 | 1.08  |
| 1380644_at          | 0.83 | 0.86 | 0.75 | 0.89  |
| 1393324_at          | 0.92 | 1.02 | 0.62 | 0.88  |
| 1381829_at          | 0.78 | 0.67 | 0.84 | 1.06  |
| 1385240_at          | 0.93 | 0.89 | 0.80 | 1.46  |
| 1385527_at          | 0.74 | 1.15 | 0.37 | 0.78  |
| 1391758_at          | 1.00 | 0.87 | 0.76 | 1.09  |
| 1381650_at          | 0.68 | 0.79 | 0.64 | 0.93  |
| 1382368_at          | 0.68 | 0.98 | 0.60 | 0.46  |
| 1377396_at          | 1.40 | 1.00 | 0.77 | 1.08  |
| 1393692_at          | 0.90 | 0.71 | 0.67 | 0.77  |
| 1393576_at          | 0.82 | 1.11 | 0.50 | 0.54  |
| 1394964_at          | 0.76 | 0.83 | 0.88 | 1.02  |
| 1397302_at          | 1.02 | 0.78 | 0.91 | 0.83  |
| 1374283_at          | 0.91 | 0.84 | 0.67 | 0.87  |
| 1376096_a_at        | 0.91 | 0.89 | 0.81 | 0.97  |
| 1375444_at          | 0.39 | 0.81 | 0.55 | 1.32  |
| 1388101_at          | 0.94 | 1.33 | 0.82 | 0.99  |
| 1395650_at          | 0.92 | 0.53 | 0.52 | 0.89  |

**Supplementary Table 6: Probe Sets Showing Circadian Oscillations in Expression Involved in Adipogenesis/Adipocyte Differentiation**

| <b>Probe set ID</b> | <b>Cluster</b> | <b>Accession number</b> | <b>Gene Symbol</b>  | <b>Gene name</b>                                    | <b>Function category</b> |
|---------------------|----------------|-------------------------|---------------------|-----------------------------------------------------|--------------------------|
| 1370510_at          | 1              | AB012600                | <i>Arntl, Bmal1</i> | Aryl hydrocarbon receptor nuclear translocator-like | Transcription regulation |
| 1370816_at          | 4              | M25804                  | <i>Nr1d1</i>        | Nuclear receptor subfamily 1, group D, member 1     | Transcription regulation |
| 1370209_at          | 4              | BE101336                | <i>Bteb1, Klf9*</i> | Basic transcription element binding protein 1       | Transcription regulation |
| 1371864_at          | 5              | AW524563                | <i>Bteb1, Klf9*</i> | basic transcription element binding protein 1       | Transcription regulation |
| 1368249_at          | 5              | NM_053536               | <i>Klf15</i>        | Kruppel-like factor 15                              | Transcription regulation |
| 1390010_at          | 5              | AI454081                | <i>Ncoal</i>        | Nuclear receptor coactivator 1                      | Transcription regulation |
| 1367771_at          | 6              | NM_031345               | <i>Dsipi, Gilz</i>  | Delta sleep inducing peptide, immunoreact           | Transcription regulation |
| 1388674_at          | 1              | AI010427                | <i>Cdkn1a, p21</i>  | Cyclin-dependent kinase inhibitor 1A                | Cell Cycle/ Apoptosis    |
| 1397409_s_at        | 5              | BE113999                | <i>Wee1*</i>        | Wee 1 homolog                                       | Cell Cycle/ Apoptosis    |
| 1385973_at          | 5              | AI717265                | <i>Wee1*</i>        | Wee 1 homolog                                       | Cell Cycle/ Apoptosis    |
| 1375692_at          | 5              | AI229025                | <i>Mapk1</i>        | Mitogen activated protein kinase 1                  | Signal Transduction      |
| 1368681_at          | 6              | NM_012636               | <i>Pthlh</i>        | Parathyroid hormone-like peptide                    | Signal Transduction      |
| 1368862_at          | 6              | NM_033230               | <i>Akt1</i>         | v-akt murine thymoma viral oncogene homolog 1       | Signal Transduction      |
