# Supplementary material
Source: PubMed Central journal article supplement (PMC2957797)
Supplement: c7731d57ab95fa1f3a8d3df1f445d677_figS1-S3.pdf [file c7731d57ab95fa1f3a8d3df1f445d677_figS1-S3.pdf]

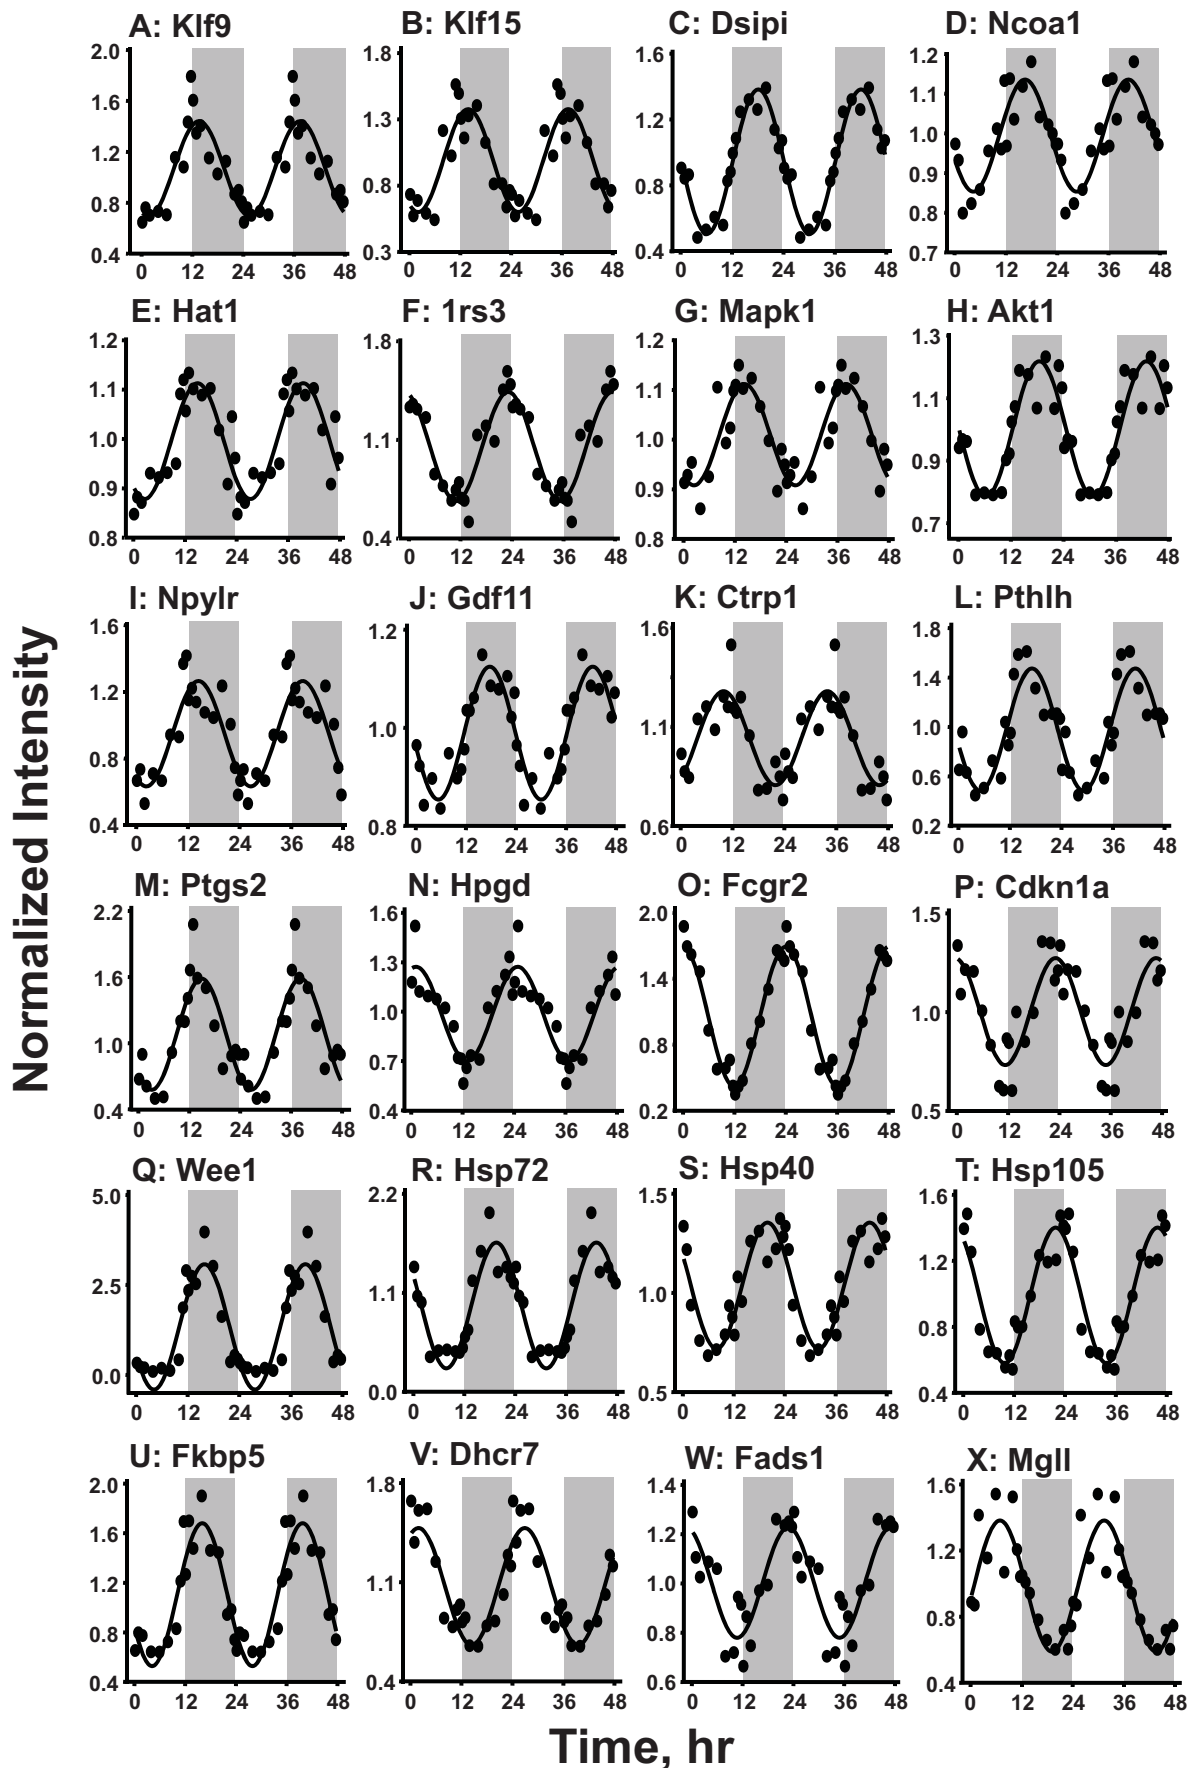

**Supplementary Figure 1.** Examples of genes showing circadian oscillation in expression in adipose tissue. Shaded areas indicate dark periods and unshaded areas indicate light periods. Circles represent the original data and solid lines represent the curve fitted to a sine function.

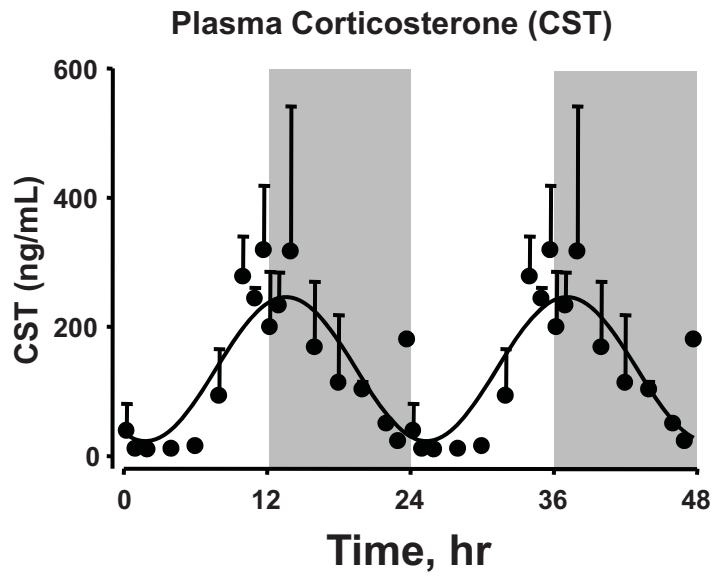

**Supplementary Figure 2.** Plasma corticosterone as a function of circadian time. Shaded areas indicate dark periods and unshaded areas indicate light periods. Circles represent the original data and solid lines represent the curve fitted to a sine function.

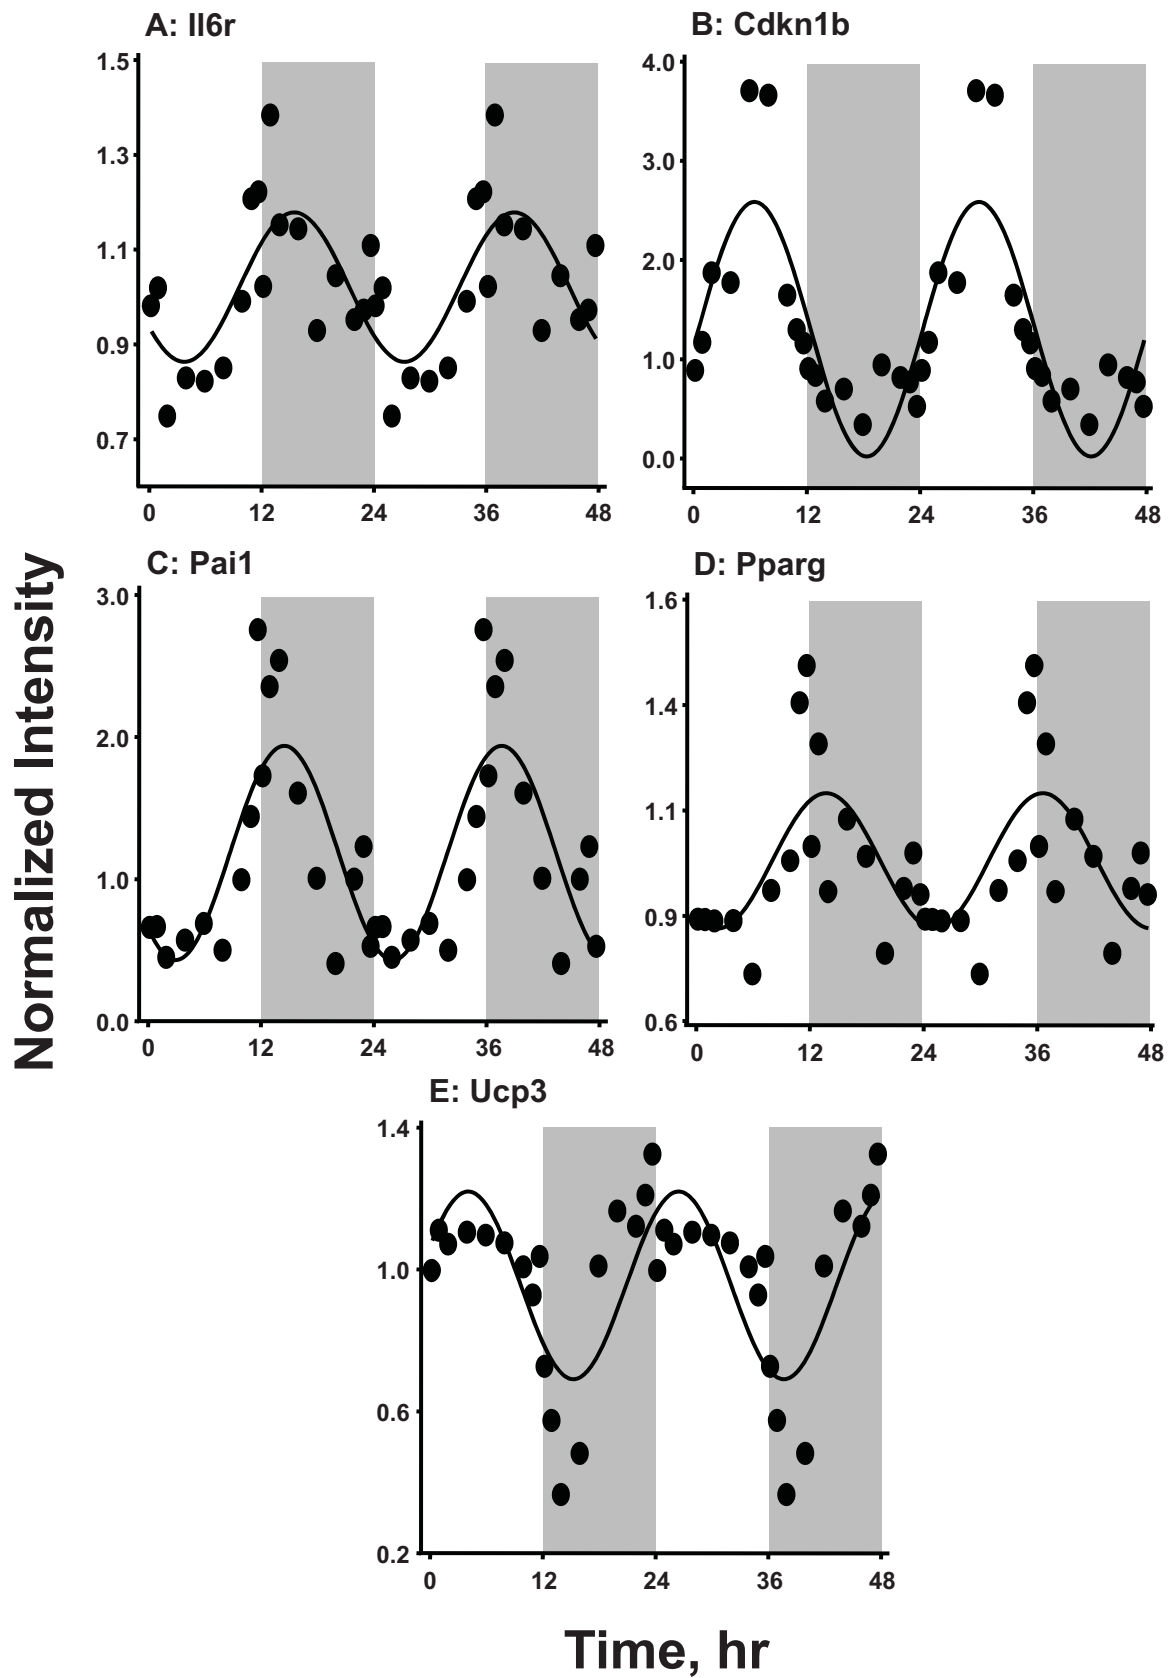

**Supplementary Figure 3.** Expression patterns of genes showing circadian oscillation in expression but did not pass goodness-of-fit cutoff. Shaded areas indicate dark periods and unshaded areas indicate light periods. Circles represent the original data and solid lines represent the curve fitted to a sine function.
